# Supplementary material for: Low Neonatal Plasma n-6/n-3 PUFA Ratios Regulate Offspring Adipogenic Potential and Condition Adult Obesity Resistance
Source: Oxford University Press journal article supplement (doi:10.2337/db17-0890), 2017-11-14
Supplement: db170890supplementarydata2.xlsx [file db170890supplementarydata2.xlsx]

## Sheet: Significant_FDR 0.1
Column #	Transcript ID	gene_assignment	Gene Symbol	RefSeq	GeneID	p-value(n-6/n-3 Exposure)	Mean(HIGH n-6/n-3)	Std(HIGH n-6/n-3)	StdErr(HIGH n-6/n-3)	Mean(Low n-6n-3)	Std(Low n-6n-3)	StdErr(Low n-6n-3)	p-value(HIGH n-6/n-3 vs. Low n-6n-3)	Ratio(HIGH n-6/n-3 vs. Low n-6n-3)	Fold-Change(HIGH n-6/n-3 vs. Low n-6n-3)	Fold-Change(HIGH n-6/n-3 vs. Low n-6n-3) (Description)
5340	17210850	ENSMUST00000082908 // Gm26206 // predicted gene, 26206 // --- // ---	Gm26206	ENSMUST00000082908		0.0228684	3.10666	0.154895	0.0774476	3.41607	0.13231	0.0661549	0.0228684	0.806969	-1.2392	HIGH n-6/n-3 down vs Low n-6n-3
5342	17210855	NM_008866 // Lypla1 // lysophospholipase 1 // 1 A1|1 // 18777 /// XM_006495471 // Lypla	Lypla1	NM_008866		0.0329152	7.01145	0.186626	0.0933131	6.72071	0.0979888	0.0489944	0.0329152	1.22327	1.22327	HIGH n-6/n-3 up vs Low n-6n-3
5378	17211280	NM_026392 // Tmem70 // transmembrane protein 70 // 1 A3|1 // 70397 /// NM_027415 // Tme	Tmem70	NM_026392		0.0366258	6.18679	0.18776	0.0938798	5.85481	0.161889	0.0809446	0.0366258	1.25874	1.25874	HIGH n-6/n-3 up vs Low n-6n-3
5379	17211286	NM_001159711 // Ly96 // lymphocyte antigen 96 // 1 A3|1 // 17087 /// NM_016923 // Ly96	Ly96	NM_001159711		0.0388495	4.92647	0.246125	0.123062	4.53976	0.160124	0.0800619	0.0388495	1.30741	1.30741	HIGH n-6/n-3 up vs Low n-6n-3
5404	17211517	ENSMUST00000122791 // Gm25294 // predicted gene, 25294 // --- // ---	Gm25294	ENSMUST00000122791		0.00502028	2.09601	0.145464	0.0727322	2.63021	0.200502	0.100251	0.00502028	0.69054	-1.44814	HIGH n-6/n-3 down vs Low n-6n-3
5422	17211700	NM_178601 // Imp4 // IMP4, U3 small nucleolar ribonucleoprotein, homolog (yeast) // 1 B	Imp4	NM_178601		0.01775	5.34208	0.0323629	0.0161815	4.84469	0.305591	0.152796	0.01775	1.41166	1.41166	HIGH n-6/n-3 up vs Low n-6n-3
5430	17211790	NM_015818 // Hs6st1 // heparan sulfate 6-O-sulfotransferase 1 // 1 B|1 // 50785 /// ENS	Hs6st1	NM_015818		0.0036315	4.40559	0.13927	0.0696348	4.04918	0.0667327	0.0333663	0.0036315	1.28024	1.28024	HIGH n-6/n-3 up vs Low n-6n-3
5446	17211987	XM_006496175 // Lipt1 // lipoyltransferase 1 // 1 B|1 // 623661 /// ENSMUST00000181885	Lipt1	XM_006496175		0.0260014	2.22562	0.0343205	0.0171602	2.31987	0.0541938	0.0270969	0.0260014	0.936762	-1.06751	HIGH n-6/n-3 down vs Low n-6n-3
5461	17212123	NM_028043 // Cnot11 // CCR4-NOT transcription complex, subunit 11 // 1 B|1 18.31 cM //	Cnot11	NM_028043		0.0191696	4.77871	0.174859	0.0874297	4.41808	0.144892	0.072446	0.0191696	1.28399	1.28399	HIGH n-6/n-3 up vs Low n-6n-3
5467	17212211	NM_001025602 // Il1rl1 // interleukin 1 receptor-like 1 // 1 B|1 19.19 cM // 17082 ///	Il1rl1	NM_001025602		0.0259697	3.37717	0.18974	0.09487	3.0699	0.0878102	0.0439051	0.0259697	1.23736	1.23736	HIGH n-6/n-3 up vs Low n-6n-3
5525	17212970	NM_001177867 // Sgol2 // shugoshin-like 2 (S. pombe) // 1 C1.3|1 28.86 cM // 68549 ///	Sgol2	NM_001177867		0.0119551	2.71653	0.0974484	0.0487242	2.44066	0.120626	0.060313	0.0119551	1.21073	1.21073	HIGH n-6/n-3 up vs Low n-6n-3
5534	17213185	ENSMUST00000081455 // Gm6917 // predicted gene 6917 // 13 B3|13 // 628794 /// ENSMUST00	Gm6917	ENSMUST00000081455		0.0209695	7.4319	0.171511	0.0857555	7.04541	0.180391	0.0901956	0.0209695	1.30721	1.30721	HIGH n-6/n-3 up vs Low n-6n-3
5541	17213265	NM_008057 // Fzd7 // frizzled homolog 7 (Drosophila) // 1 C1.3|1 30.08 cM // 14369 ///	Fzd7	NM_008057		0.022214	4.47768	0.120558	0.0602788	4.14223	0.183091	0.0915454	0.022214	1.26177	1.26177	HIGH n-6/n-3 up vs Low n-6n-3																							0	0	0
5575	17213645	NM_172422 // Fastkd2 // FAST kinase domains 2 // 1 C2|1 // 75619 /// XM_006496312 // Fa	Fastkd2	NM_172422		0.0183378	3.64491	0.102356	0.051178	3.30853	0.182794	0.0913972	0.0183378	1.26259	1.26259	HIGH n-6/n-3 up vs Low n-6n-3																							0	0	0
5587	17213806	ENSMUST00000083760 // Gm25411 // predicted gene, 25411 // --- // ---	Gm25411	ENSMUST00000083760		0.00188748	2.26112	0.0734458	0.0367229	2.65477	0.130165	0.0650824	0.00188748	0.761206	-1.31371	HIGH n-6/n-3 down vs Low n-6n-3
5589	17213880	NM_025683 // Rpe // ribulose-5-phosphate-3-epimerase // 1 C3|1 // 66646 /// XM_00649619	Rpe	NM_025683		0.0241094	6.53061	0.214509	0.107255	6.19854	0.0557065	0.0278533	0.0241094	1.25882	1.25882	HIGH n-6/n-3 up vs Low n-6n-3
5635	17214387	NM_009518 // Wnt10a // wingless-type MMTV integration site family, member 10A // 1 C3|1	Wnt10a	NM_009518		0.0316841	2.11812	0.106876	0.0534382	1.95453	0.0485207	0.0242603	0.0316841	1.12007	1.12007	HIGH n-6/n-3 up vs Low n-6n-3
5670	17214841	NM_010472 // Agfg1 // ArfGAP with FG repeats 1 // 1 C5|1 // 15463 /// ENSMUST0000006338	Agfg1	NM_010472		0.042847	7.18802	0.102954	0.0514769	6.91326	0.18825	0.0941251	0.042847	1.20979	1.20979	HIGH n-6/n-3 up vs Low n-6n-3
5723	17215539	NM_029269 // Spp2 // secreted phosphoprotein 2 // 1|1 C5 // 75396 /// XM_006529918 // S	Spp2	NM_029269		0.0339239	1.96903	0.0911082	0.0455541	2.17713	0.12183	0.0609152	0.0339239	0.865678	-1.15516	HIGH n-6/n-3 down vs Low n-6n-3
5749	17215807	NM_147037 // Olfr1413 // olfactory receptor 1413 // 1 D-E1|1 // 259039 /// ENSMUST00000	Olfr1413	NM_147037		0.0299502	2.36437	0.243621	0.121811	2.74307	0.110757	0.0553785	0.0299502	0.769129	-1.30017	HIGH n-6/n-3 down vs Low n-6n-3
5757	17215839	NM_181405 // Rnpepl1 // arginyl aminopeptidase (aminopeptidase B)-like 1 // 1 D|1 // 10	Rnpepl1	NM_181405		0.022105	6.79844	0.21896	0.10948	6.2896	0.24972	0.12486	0.022105	1.42291	1.42291	HIGH n-6/n-3 up vs Low n-6n-3
5771	17216063	NM_016778 // Bok // BCL2-related ovarian killer // 1 D|1 // 51800 /// ENSMUST0000002749	Bok	NM_016778		0.00803045	4.23007	0.114799	0.0573994	3.95824	0.0793901	0.0396951	0.00803045	1.20733	1.20733	HIGH n-6/n-3 up vs Low n-6n-3
5871	17217127	NM_001145804 // Nucks1 // nuclear casein kinase and cyclin-dependent kinase substrate 1	Nucks1	NM_001145804		0.0177757	7.15408	0.168794	0.0843969	6.87685	0.0294303	0.0147151	0.0177757	1.21187	1.21187	HIGH n-6/n-3 up vs Low n-6n-3
5932	17217789	NM_001287179 // Kif14 // kinesin family member 14 // 1 F|1 59.8 cM // 381293 /// XM_006	Kif14	NM_001287179		0.0491906	3.01157	0.185134	0.0925669	2.68461	0.190918	0.0954588	0.0491906	1.25437	1.25437	HIGH n-6/n-3 up vs Low n-6n-3
5946	17217914	NM_009791 // Aspm // asp (abnormal spindle)-like, microcephaly associated (Drosophila)	Aspm	NM_009791		0.0351426	3.01552	0.155972	0.0779859	2.74203	0.1282	0.0641002	0.0351426	1.20873	1.20873	HIGH n-6/n-3 up vs Low n-6n-3
5947	17217946	NM_031164 // F13b // coagulation factor XIII, beta subunit // 1 F|1 61.57 cM // 14060 /	F13b	NM_031164		0.00097785	2.10109	0.0713399	0.0356699	2.38088	0.0604501	0.0302251	0.00097785	0.823711	-1.21402	HIGH n-6/n-3 down vs Low n-6n-3																							0	0	0
5977	17218321	NM_011267 // Rgs16 // regulator of G-protein signaling 16 // 1 G3|1 65.43 cM // 19734 /	Rgs16	NM_011267		0.00148239	4.52759	0.0893874	0.0446937	4.0949	0.128676	0.0643382	0.00148239	1.34974	1.34974	HIGH n-6/n-3 up vs Low n-6n-3
5993	17218449	NM_028333 // Angptl1 // angiopoietin-like 1 // 1 H1|1 // 72713 /// ENSMUST00000027885 /	Angptl1	NM_028333		0.0102917	4.4592	0.1874	0.0936998	4.02909	0.139386	0.069693	0.0102917	1.34734	1.34734	HIGH n-6/n-3 up vs Low n-6n-3
6000	17218565	NR_028518 // Scarna3a // small Cajal body-specific RNA 3A // 1|1 // 100217414 /// NR_03	Scarna3a	NR_028518		0.034802	5.02881	0.0905719	0.045286	5.32976	0.202215	0.101108	0.034802	0.811714	-1.23196	HIGH n-6/n-3 down vs Low n-6n-3
6009	17218653	NR_002840 // Gas5 // growth arrest specific 5 // 1 H2.1|1 // 14455 /// ENSMUST000001591	Gas5	NR_002840		0.0331351	6.5665	0.153444	0.076722	6.20905	0.209432	0.104716	0.0331351	1.28116	1.28116	HIGH n-6/n-3 up vs Low n-6n-3
6053	17219139	NM_009063 // Rgs5 // regulator of G-protein signaling 5 // 1 H2|1 76.84 cM // 19737 ///	Rgs5	NM_009063		0.00866767	8.95677	0.0838061	0.0419031	8.406	0.275195	0.137598	0.00866767	1.46487	1.46487	HIGH n-6/n-3 up vs Low n-6n-3
6070	17219264	NM_020579 // B4galt3 // UDP-Gal:betaGlcNAc beta 1,4-galactosyltransferase, polypeptide	B4galt3	NM_020579		0.0127969	3.85835	0.193604	0.096802	3.47332	0.10427	0.0521348	0.0127969	1.30588	1.30588	HIGH n-6/n-3 up vs Low n-6n-3
6077	17219339	NM_009480 // Usf1 // upstream transcription factor 1 // 1 H|1 79.4 cM // 22278 /// XM_0	Usf1	NM_009480		0.0309165	4.35221	0.0545933	0.0272966	4.2229	0.0742559	0.0371279	0.0309165	1.09377	1.09377	HIGH n-6/n-3 up vs Low n-6n-3
6173	17219978	NM_025511 // Cox20 // COX20 Cox2 chaperone // 1|1 H3 // 66359 /// ENSMUST00000027781 //	Cox20	NM_025511		0.0171256	6.97241	0.229339	0.114669	6.30642	0.337276	0.168638	0.0171256	1.58665	1.58665	HIGH n-6/n-3 up vs Low n-6n-3
6178	17220016	ENSMUST00000083033 // Gm24405 // predicted gene, 24405 // --- // ---	Gm24405	ENSMUST00000083033		0.0317919	5.35361	0.392065	0.196032	6.05831	0.320015	0.160007	0.0317919	0.613573	-1.6298	HIGH n-6/n-3 down vs Low n-6n-3
6181	17220051	XR_373767 // Gm10518 // predicted gene 10518 // 1 H4|1 // 100040914 /// ENSMUST00000097	Gm10518	XR_373767		0.0277028	2.65893	0.145869	0.0729346	2.95427	0.143196	0.0715979	0.0277028	0.814878	-1.22718	HIGH n-6/n-3 down vs Low n-6n-3
6192	17220197	NM_177099 // Lefty2 // left-right determination factor 2 // 1 H4|1 // 320202 /// ENSMUS	Lefty2	NM_177099		0.0156581	1.88873	0.0879444	0.0439722	2.15535	0.133388	0.0666942	0.0156581	0.831261	-1.20299	HIGH n-6/n-3 down vs Low n-6n-3
6206	17220432	NM_016928 // Tlr5 // toll-like receptor 5 // 1 H5|1 86.12 cM // 53791 /// ENSMUST000001	Tlr5	NM_016928		0.0210625	4.42073	0.269056	0.134528	3.88284	0.218817	0.109409	0.0210625	1.45185	1.45185	HIGH n-6/n-3 up vs Low n-6n-3
6213	17220526	NR_034044 // Snora36b // small nucleolar RNA, H/ACA box 36B // 1|1 // 100217449 /// ENS	Snora36b	NR_034044		0.0224821	4.94402	0.715563	0.357781	6.40637	0.637875	0.318937	0.0224821	0.362899	-2.75559	HIGH n-6/n-3 down vs Low n-6n-3
6299	17221186	NR_024067 // Snhg6 // small nucleolar RNA host gene 6 // 1 A2|1 // 73824 /// ENSMUST000	Snhg6	NR_024067		0.00200168	7.0622	0.13971	0.0698551	6.64847	0.0757377	0.0378689	0.00200168	1.33212	1.33212	HIGH n-6/n-3 up vs Low n-6n-3
6349	17221360	NM_145381 // Lactb2 // lactamase, beta 2 // 1 A3|1 // 212442 /// XM_006495490 // Lactb2	Lactb2	NM_145381		0.0102862	6.56296	0.1149	0.0574498	6.14769	0.193999	0.0969995	0.0102862	1.33356	1.33356	HIGH n-6/n-3 up vs Low n-6n-3
6376	17221627	NM_145856 // Il17f // interleukin 17F // 1 A4|1 // 257630 /// ENSMUST00000039046 // Il1	Il17f	NM_145856		0.0470237	2.39824	0.119767	0.0598835	2.70175	0.212093	0.106046	0.0470237	0.810277	-1.23415	HIGH n-6/n-3 down vs Low n-6n-3
6391	17221792	NM_026604 // Fam135a // family with sequence similarity 135, member A // 1 A5|1 // 6818	Fam135a	NM_026604		0.00478999	4.94405	0.13016	0.0650799	4.44801	0.18688	0.0934398	0.00478999	1.41034	1.41034	HIGH n-6/n-3 up vs Low n-6n-3
6399	17221918	NM_001033764 // 4931408C20Rik // RIKEN cDNA 4931408C20 gene // 1 A5|1 // 210940 /// ENS	4931408C20Rik	NM_001033764		0.0466267	1.85286	0.0303933	0.0151967	2.11692	0.209183	0.104592	0.0466267	0.832741	-1.20085	HIGH n-6/n-3 down vs Low n-6n-3
6406	17221960	ENSMUST00000124445 // Ptp4a1 // protein tyrosine phosphatase 4a1 // 1 B|1 // 19243	Ptp4a1	ENSMUST00000124445		0.0307842	5.30241	0.243934	0.121967	4.82965	0.231887	0.115943	0.0307842	1.38776	1.38776	HIGH n-6/n-3 up vs Low n-6n-3
6431	17222149	NM_153408 // Neurl3 // neuralized homolog 3 homolog (Drosophila) // 1 B|1 // 214854 ///	Neurl3	NM_153408		0.0478908	5.7408	0.0952027	0.0476013	5.23042	0.400668	0.200334	0.0478908	1.42443	1.42443	HIGH n-6/n-3 up vs Low n-6n-3
6471	17222650	NM_026430 // Uxs1 // UDP-glucuronate decarboxylase 1 // 1 C1.1|1 // 67883 /// XM_006496	Uxs1	NM_026430		6.94431e-06	4.30759	0.02633	0.013165	3.95845	0.0406072	0.0203036	6.94431e-06	1.2738	1.2738	HIGH n-6/n-3 up vs Low n-6n-3
6475	17222694	NM_023645 // Kdelc1 // KDEL (Lys-Asp-Glu-Leu) containing 1 // 1|1 C1 // 72050 /// XM_00	Kdelc1	NM_023645		0.0326058	5.00049	0.315571	0.157786	4.54479	0.0948846	0.0474423	0.0326058	1.37144	1.37144	HIGH n-6/n-3 up vs Low n-6n-3
6518	17223313	NM_001037742 // Tyw5 // tRNA-yW synthesizing protein 5 // 1 C1.3|1 // 68736 /// NM_0011	Tyw5	NM_001037742		0.0381413	4.59026	0.194503	0.0972514	4.16901	0.251821	0.125911	0.0381413	1.33909	1.33909	HIGH n-6/n-3 up vs Low n-6n-3
6561	17223793	NM_001042659 // Fzd5 // frizzled homolog 5 (Drosophila) // 1 C2|1 32.74 cM // 14367 ///	Fzd5	NM_001042659		0.0368547	3.18668	0.240222	0.120111	2.79936	0.162019	0.0810094	0.0368547	1.30797	1.30797	HIGH n-6/n-3 up vs Low n-6n-3
6596	17224251	NM_178241 // Cxcr1 // chemokine (C-X-C motif) receptor 1 // 1 C3|1 38.44 cM // 227288 /	Cxcr1	NM_178241		0.0220315	2.29877	0.174056	0.0870278	2.62988	0.127797	0.0638987	0.0220315	0.794921	-1.25799	HIGH n-6/n-3 down vs Low n-6n-3
6603	17224342	NM_021313 // Rnf25 // ring finger protein 25 // 1 C3|1 // 57751 /// XM_006496168 // Rnf	Rnf25	NM_021313		0.00263069	4.88316	0.0831515	0.0415757	4.57658	0.0924962	0.0462481	0.00263069	1.23677	1.23677	HIGH n-6/n-3 up vs Low n-6n-3
6614	17224500	NM_001003917 // Atg9a // autophagy related 9A // 1 C3|1 // 245860 /// NM_001288612 // A	Atg9a	NM_001003917		0.0486649	4.58899	0.204096	0.102048	4.31227	0.093141	0.0465705	0.0486649	1.21143	1.21143	HIGH n-6/n-3 up vs Low n-6n-3
6686	17225329	NM_198652 // Hjurp // Holliday junction recognition protein // 1 D|1 // 381280 /// ENSM	Hjurp	NM_198652		0.00729859	6.13295	0.0758972	0.0379486	5.71983	0.193328	0.0966642	0.00729859	1.33156	1.33156	HIGH n-6/n-3 up vs Low n-6n-3
6720	17225775	NM_025920 // Thap4 // THAP domain containing 4 // 1 D|1 // 67026 /// XM_006529801 // Th	Thap4	NM_025920		0.00639449	3.64864	0.106924	0.0534618	3.36804	0.0857402	0.0428701	0.00639449	1.21471	1.21471	HIGH n-6/n-3 up vs Low n-6n-3
6858	17227320	NM_153774 // Ipo9 // importin 9 // 1 E4|1 // 226432 /// ENSMUST00000041023 // Ipo9 // i	Ipo9	NM_153774		0.0297362	6.42805	0.075814	0.037907	6.05014	0.255532	0.127766	0.0297362	1.29946	1.29946	HIGH n-6/n-3 up vs Low n-6n-3
6877	17227570	NM_021605 // Nek7 // NIMA (never in mitosis gene a)-related expressed kinase 7 // 1 E4|	Nek7	NM_021605		0.0483093	7.5529	0.116132	0.0580658	7.19687	0.263572	0.131786	0.0483093	1.2799	1.2799	HIGH n-6/n-3 up vs Low n-6n-3
6914	17228021	ENSMUST00000157873 // Gm24402 // predicted gene, 24402 // --- // ---	Gm24402	ENSMUST00000157873		0.0349457	2.6252	0.239715	0.119858	3.07907	0.233351	0.116676	0.0349457	0.730078	-1.36972	HIGH n-6/n-3 down vs Low n-6n-3
6916	17228046	NM_011277 // Rnf2 // ring finger protein 2 // 1 G2|1 // 19821 /// ENSMUST00000076110 //	Rnf2	NM_011277		0.00898183	7.31034	0.155754	0.077877	6.7903	0.225184	0.112592	0.00898183	1.43399	1.43399	HIGH n-6/n-3 up vs Low n-6n-3
6918	17228057	NM_197990 // 1700025G04Rik // RIKEN cDNA 1700025G04 gene // 1 G2|1 // 69399 /// ENSMUST	1700025G04Rik	NM_197990		0.0487483	6.59435	0.237693	0.118847	6.18287	0.234329	0.117165	0.0487483	1.33005	1.33005	HIGH n-6/n-3 up vs Low n-6n-3
6981	17228958	ENSMUST00000066241 // Gm5705 // predicted gene 5705 // --- // ---	Gm5705	ENSMUST00000066241		0.047055	2.11705	0.234383	0.117192	2.55957	0.266891	0.133446	0.047055	0.735847	-1.35898	HIGH n-6/n-3 down vs Low n-6n-3
6999	17229178	NM_009721 // Atp1b1 // ATPase, Na+/K+ transporting, beta 1 polypeptide // 1 H2.2|1 71.7	Atp1b1	NM_009721		0.0422401	6.74173	0.300031	0.150015	6.31217	0.146915	0.0734577	0.0422401	1.34682	1.34682	HIGH n-6/n-3 up vs Low n-6n-3
7048	17229658	NM_010185 // Fcer1g // Fc receptor, IgE, high affinity I, gamma polypeptide // 1 H3|1 7	Fcer1g	NM_010185		0.0398171	6.8468	0.223945	0.111973	6.16877	0.467574	0.233787	0.0398171	1.59995	1.59995	HIGH n-6/n-3 up vs Low n-6n-3																							0	0	0
7126	17230451	NR_003623 // Gm5069 // glyceraldehyde-3-phosphate dehydrogenase pseudogene // 1 H4|1 //	Gm5069	NR_003623		0.00797572	2.36142	0.0736196	0.0368098	2.65827	0.133205	0.0666024	0.00797572	0.814029	-1.22846	HIGH n-6/n-3 down vs Low n-6n-3
7132	17230484	NM_010145 // Ephx1 // epoxide hydrolase 1, microsomal // 1 H4|1 84.48 cM // 13849 /// E	Ephx1	NM_010145		0.0224038	5.43054	0.117606	0.0588029	5.80187	0.212866	0.106433	0.0224038	0.773071	-1.29354	HIGH n-6/n-3 down vs Low n-6n-3
7136	17230550	NM_133815 // Lbr // lamin B receptor // 1 H5|1 84.89 cM // 98386 /// ENSMUST00000005003	Lbr	NM_133815		0.0188022	6.7221	0.107667	0.0538334	6.26937	0.262488	0.131244	0.0188022	1.36862	1.36862	HIGH n-6/n-3 up vs Low n-6n-3
7139	17230573	NM_001083120 // Enah // enabled homolog (Drosophila) // 1 H5|1 84.93 cM // 13800 /// NM	Enah	NM_001083120		0.00354179	3.65848	0.0698973	0.0349487	3.37935	0.0979389	0.0489694	0.00354179	1.21346	1.21346	HIGH n-6/n-3 up vs Low n-6n-3
7181	17231003	NM_001081259 // Mfsd7b // major facilitator superfamily domain containing 7B // 1 H6|1	Mfsd7b	NM_001081259		0.0198211	4.2991	0.121263	0.0606317	4.02865	0.121596	0.0607978	0.0198211	1.20618	1.20618	HIGH n-6/n-3 up vs Low n-6n-3
7216	17231366	NM_001033253 // Plekhg1 // pleckstrin homology domain containing, family G (with RhoGef	Plekhg1	NM_001033253		0.000603842	4.64849	0.0302538	0.0151269	4.32024	0.0954861	0.047743	0.000603842	1.25548	1.25548	HIGH n-6/n-3 up vs Low n-6n-3
7224	17231459	ENSMUST00000083437 // Gm22739 // predicted gene, 22739 // --- // ---	Gm22739	ENSMUST00000083437		0.0242557	2.09272	0.0590156	0.0295078	2.42127	0.211539	0.10577	0.0242557	0.796335	-1.25575	HIGH n-6/n-3 down vs Low n-6n-3
7233	17231532	NR_030698 // A630066F11Rik // RIKEN cDNA A630066F11 gene // 10|10 // 320642	A630066F11Rik	NR_030698		0.00173573	3.25073	0.0858016	0.0429008	2.9726	0.0585415	0.0292707	0.00173573	1.21262	1.21262	HIGH n-6/n-3 up vs Low n-6n-3
7234	17231534	NM_145706 // Nup43 // nucleoporin 43 // 10 A1|10 // 69912 /// ENSMUST00000040135 // Nup	Nup43	NM_145706		0.035833	3.99868	0.081071	0.0405355	3.71891	0.191174	0.0955868	0.035833	1.214	1.214	HIGH n-6/n-3 up vs Low n-6n-3
7236	17231558	NM_011835 // Katna1 // katanin p60 (ATPase-containing) subunit A1 // 10 A1|10 // 23924	Katna1	NM_011835		0.0408973	5.21585	0.30698	0.15349	4.68703	0.267933	0.133967	0.0408973	1.44275	1.44275	HIGH n-6/n-3 up vs Low n-6n-3
7289	17231999	ENSMUST00000180680 // Gm26577 // predicted gene, 26577 // --- // --- /// AK138601 // LO	Gm26577	ENSMUST00000180680		0.0426151	2.66672	0.152903	0.0764517	3.01928	0.228435	0.114217	0.0426151	0.783196	-1.27682	HIGH n-6/n-3 down vs Low n-6n-3
7312	17232187	NM_001010827 // Taar7b // trace amine-associated receptor 7B // 10 A4|10 // 209517 ///	Taar7b	NM_001010827		0.0102401	1.89849	0.116546	0.058273	2.24182	0.145236	0.0726182	0.0102401	0.788221	-1.26868	HIGH n-6/n-3 down vs Low n-6n-3
7313	17232189	NM_001010838 // Taar7d // trace amine-associated receptor 7D // 10 A4|10 // 435206 ///	Taar7d	NM_001010838		0.0340568	1.71188	0.115138	0.0575692	2.01383	0.188606	0.0943032	0.0340568	0.811159	-1.2328	HIGH n-6/n-3 down vs Low n-6n-3
7328	17232332	NM_176837 // Arhgap18 // Rho GTPase activating protein 18 // 10 A4|10 // 73910 /// XM_0	Arhgap18	NM_176837		0.0117771	5.82262	0.111871	0.0559353	5.48769	0.15061	0.0753049	0.0117771	1.26132	1.26132	HIGH n-6/n-3 up vs Low n-6n-3
7335	17232426	NM_001110195 // Echdc1 // enoyl Coenzyme A hydratase domain containing 1 // 10 A4|10 16	Echdc1	NM_001110195		0.048842	6.6519	0.27784	0.13892	6.22964	0.200643	0.100321	0.048842	1.34002	1.34002	HIGH n-6/n-3 up vs Low n-6n-3
7369	17232778	NM_177793 // Mettl24 // methyltransferase like 24 // 10 B1|10 // 327747 /// ENSMUST0000	Mettl24	NM_177793		0.021419	2.99529	0.180635	0.0903173	2.62103	0.161541	0.0807707	0.021419	1.29618	1.29618	HIGH n-6/n-3 up vs Low n-6n-3
7435	17233331	NM_025541 // Asf1a // anti-silencing function 1A histone chaperone // 10 B3|10 // 66403	Asf1a	NM_025541		0.002362	6.47472	0.113914	0.0569568	6.11384	0.0868875	0.0434437	0.002362	1.28421	1.28421	HIGH n-6/n-3 up vs Low n-6n-3
7441	17233357	NM_008297 // Hsf2 // heat shock factor 2 // 10|10 B3-B4 // 15500 /// XM_006512565 // Hs	Hsf2	NM_008297		0.000814179	4.44792	0.159334	0.0796669	3.8409	0.114029	0.0570145	0.000814179	1.52311	1.52311	HIGH n-6/n-3 up vs Low n-6n-3
7522	17233993	NM_010118 // Egr2 // early growth response 2 // 10 B5|10 34.96 cM // 13654 /// XM_00651	Egr2	NM_010118		0.0151833	2.78442	0.144357	0.0721785	3.15194	0.164157	0.0820784	0.0151833	0.775114	-1.29013	HIGH n-6/n-3 down vs Low n-6n-3
7571	17234552	XM_006513283 // Lss // lanosterol synthase // 10 C1|10 39.1 cM // 16987 /// NM_146006 /	Lss	XM_006513283		0.00750936	3.42795	0.172796	0.0863979	2.98369	0.143731	0.0718653	0.00750936	1.36062	1.36062	HIGH n-6/n-3 up vs Low n-6n-3
7594	17234742	NM_001101631 // Gm3285 // predicted gene 3285 // 10 C1|10 // 100041351	Gm3285	NM_001101631		0.0475085	3.68318	0.349147	0.174574	3.1041	0.30883	0.154415	0.0475085	1.49389	1.49389	HIGH n-6/n-3 up vs Low n-6n-3
7602	17234803	NM_007793 // Cstb // cystatin B // 10 C1|10 39.72 cM // 13014 /// ENSMUST00000005185 //	Cstb	NM_007793		0.0297437	5.1881	0.0999471	0.0499736	4.77546	0.273363	0.136681	0.0297437	1.33113	1.33113	HIGH n-6/n-3 up vs Low n-6n-3
7616	17234881	NM_001101572 // Vmn2r82 // vomeronasal 2, receptor 82 // 10 C1|10 // 624845 /// ENSMUST	Vmn2r82	NM_001101572		0.00157049	2.08709	0.0395133	0.0197566	2.39055	0.103865	0.0519326	0.00157049	0.810309	-1.2341	HIGH n-6/n-3 down vs Low n-6n-3
7645	17235227	NM_007705 // Cirbp // cold inducible RNA binding protein // 10 C1|10 39.72 cM // 12696	Cirbp	NM_007705		0.0205462	3.78603	0.108523	0.0542617	3.50115	0.146762	0.0733809	0.0205462	1.21831	1.21831	HIGH n-6/n-3 up vs Low n-6n-3
7653	17235320	NM_139292 // Reep6 // receptor accessory protein 6 // 10 C1|10 // 70335 /// XM_00651407	Reep6	NM_139292		0.0030764	7.07615	0.195582	0.097791	6.52002	0.126458	0.063229	0.0030764	1.47033	1.47033	HIGH n-6/n-3 up vs Low n-6n-3
7713	17235990	NM_001145198 // 1500009L16Rik // RIKEN cDNA 1500009L16 gene // 10 C1|10 // 69784 /// EN	1500009L16Rik	NM_001145198		0.032877	4.22813	0.155115	0.0775575	3.89807	0.182109	0.0910546	0.032877	1.25706	1.25706	HIGH n-6/n-3 up vs Low n-6n-3
7815	17237004	ENSMUST00000157098 // Gm26278 // predicted gene, 26278 // --- // ---	Gm26278	ENSMUST00000157098		0.0228794	3.69114	0.352171	0.176086	4.64368	0.519003	0.259502	0.0228794	0.516723	-1.93527	HIGH n-6/n-3 down vs Low n-6n-3
7943	17238210	NM_008921 // Prim1 // DNA primase, p49 subunit // 10 D3|10 76.39 cM // 19075 /// ENSMUS	Prim1	NM_008921		0.0230283	4.11248	0.241534	0.120767	3.63438	0.202725	0.101362	0.0230283	1.39291	1.39291	HIGH n-6/n-3 up vs Low n-6n-3
7956	17238394	NM_001252326 // Pan2 // PAN2 polyA specific ribonuclease subunit homolog (S. cerevisiae	Pan2	NM_001252326		0.0248452	5.56909	0.160432	0.0802161	5.16904	0.216023	0.108011	0.0248452	1.31956	1.31956	HIGH n-6/n-3 up vs Low n-6n-3
7992	17238679	NM_146378 // Olfr794 // olfactory receptor 794 // 10 D3|10 // 258375 /// ENSMUST0000005	Olfr794	NM_146378		0.0113037	2.53461	0.0722246	0.0361123	2.89812	0.188313	0.0941566	0.0113037	0.777274	-1.28655	HIGH n-6/n-3 down vs Low n-6n-3
8002	17238703	NM_146671 // Olfr822 // olfactory receptor 822 // 10 D3|10 // 258666 /// ENSMUST0000008	Olfr822	NM_146671		0.0114205	2.60103	0.0943033	0.0471516	2.27668	0.153779	0.0768896	0.0114205	1.2521	1.2521	HIGH n-6/n-3 up vs Low n-6n-3
8080	17239054	XM_006512596 // Pcmt1 // protein-L-isoaspartate (D-aspartate) O-methyltransferase 1 //	Pcmt1	XM_006512596		0.0109795	5.89265	0.0777154	0.0388577	5.61749	0.130226	0.065113	0.0109795	1.21013	1.21013	HIGH n-6/n-3 up vs Low n-6n-3
8081	17239070	NR_033219 // BC020402 // cDNA sequence BC020402 // --- // 407824	BC020402	NR_033219		0.0411486	3.27103	0.0958069	0.0479034	2.72	0.414387	0.207194	0.0411486	1.46513	1.46513	HIGH n-6/n-3 up vs Low n-6n-3
8137	17239616	NM_001161825 // Pex7 // peroxisomal biogenesis factor 7 // 10 A3|10 // 18634 /// NM_008	Pex7	NM_001161825		0.0452941	5.20494	0.124684	0.0623418	4.97388	0.134481	0.0672403	0.0452941	1.1737	1.1737	HIGH n-6/n-3 up vs Low n-6n-3
8175	17239985	ENSMUST00000102422 // Gm22370 // predicted gene, 22370 // --- // ---	Gm22370	ENSMUST00000102422		0.0243187	5.33501	0.189793	0.0948967	5.77492	0.224863	0.112432	0.0243187	0.737178	-1.35652	HIGH n-6/n-3 down vs Low n-6n-3																							0	0	0
8186	17240045	NM_025798 // Hint3 // histidine triad nucleotide binding protein 3 // 10 A4|10 // 66847	Hint3	NM_025798		0.0289968	5.08533	0.194236	0.0971182	4.71979	0.166888	0.0834442	0.0289968	1.28837	1.28837	HIGH n-6/n-3 up vs Low n-6n-3
8194	17240100	NM_001146349 // Rnf217 // ring finger protein 217 // 10 A4|10 // 268291 /// ENSMUST0000	Rnf217	NM_001146349		0.0477651	4.0782	0.167259	0.0836296	3.80023	0.149171	0.0745856	0.0477651	1.21249	1.21249	HIGH n-6/n-3 up vs Low n-6n-3
8206	17240190	NM_172508 // Dse // dermatan sulfate epimerase // 10 B1|10 // 212898 /// ENSMUST0000004	Dse	NM_172508		0.0470601	6.17149	0.0783959	0.039198	5.74618	0.332269	0.166134	0.0470601	1.34286	1.34286	HIGH n-6/n-3 up vs Low n-6n-3
8229	17240365	NM_007444 // Amd2 // S-adenosylmethionine decarboxylase 2 // 10 B1|10 // 100041585 ///	Amd2	NM_007444		0.0109592	6.51277	0.122371	0.0611854	6.22257	0.102874	0.051437	0.0109592	1.22281	1.22281	HIGH n-6/n-3 up vs Low n-6n-3
8235	17240431	NM_009213 // Smpd2 // sphingomyelin phosphodiesterase 2, neutral // 10 B2|10 // 20598 /	Smpd2	NM_009213		0.0289402	4.96581	0.19363	0.0968152	4.58273	0.185618	0.0928088	0.0289402	1.30412	1.30412	HIGH n-6/n-3 up vs Low n-6n-3
8320	17241355	NM_145419 // Hkdc1 // hexokinase domain containing 1 // 10 B4|10 // 216019 /// XM_00651	Hkdc1	NM_145419		0.025647	2.49272	0.134121	0.0670607	2.27246	0.0657795	0.0328898	0.025647	1.16495	1.16495	HIGH n-6/n-3 up vs Low n-6n-3
8361	17241731	NM_031397 // Bicc1 // bicaudal C homolog 1 (Drosophila) // 10 B5.3|10 36.75 cM // 83675	Bicc1	NM_031397		0.0386781	5.59973	0.136109	0.0680543	5.11086	0.344844	0.172422	0.0386781	1.40335	1.40335	HIGH n-6/n-3 up vs Low n-6n-3
8381	17241962	NM_010798 // Mif // macrophage migration inhibitory factor // 10 C1|10 38.59 cM // 1731	Mif	NM_010798		0.0355832	6.99019	0.26886	0.13443	6.51635	0.225664	0.112832	0.0355832	1.3888	1.3888	HIGH n-6/n-3 up vs Low n-6n-3
8382	17241968	NM_001161853 // Smarcb1 // SWI/SNF related, matrix associated, actin dependent regulato	Smarcb1	NM_001161853		0.00818717	6.8087	0.177056	0.0885281	6.43883	0.0709458	0.0354729	0.00818717	1.29224	1.29224	HIGH n-6/n-3 up vs Low n-6n-3
8421	17242535	NM_027875 // Syde1 // synapse defective 1, Rho GTPase, homolog 1 (C. elegans) // 10 C1|	Syde1	NM_027875		0.0377242	4.45266	0.213516	0.106758	3.99859	0.267048	0.133524	0.0377242	1.36989	1.36989	HIGH n-6/n-3 up vs Low n-6n-3
8435	17242676	NM_144528 // Rnf126 // ring finger protein 126 // 10 C1|10 // 70294 /// NR_027505 // Rn	Rnf126	NM_144528		0.013643	6.98761	0.146928	0.0734638	6.45759	0.269916	0.134958	0.013643	1.44395	1.44395	HIGH n-6/n-3 up vs Low n-6n-3
8456	17242931	NM_001164147 // Tcf3 // transcription factor 3 // 10 C1|10 39.72 cM // 21423 /// NM_001	Tcf3	NM_001164147		0.00388546	5.78135	0.132638	0.0663192	5.43015	0.0788821	0.039441	0.00388546	1.27562	1.27562	HIGH n-6/n-3 up vs Low n-6n-3
8470	17243034	NM_021462 // Mknk2 // MAP kinase-interacting serine/threonine kinase 2 // 10 C1|10 // 1	Mknk2	NM_021462		0.0136749	8.69129	0.124233	0.0621166	8.32227	0.174343	0.0871716	0.0136749	1.29147	1.29147	HIGH n-6/n-3 up vs Low n-6n-3
8512	17243460	NM_199062 // Zfp781 // zinc finger protein 781 // 10 C1|10 // 331188 /// XM_006514357 /	Zfp781	NM_199062		0.0144133	3.62898	0.20578	0.10289	3.20991	0.135122	0.067561	0.0144133	1.33707	1.33707	HIGH n-6/n-3 up vs Low n-6n-3
8562	17244085	NM_182959 // Slc17a8 // solute carrier family 17 (sodium-dependent inorganic phosphate	Slc17a8	NM_182959		0.045277	2.05643	0.125642	0.0628209	2.35914	0.204757	0.102379	0.045277	0.810727	-1.23346	HIGH n-6/n-3 down vs Low n-6n-3
8565	17244140	NM_001042558 // Apaf1 // apoptotic peptidase activating factor 1 // 10 C3-D1|10 45.47 c	Apaf1	NM_001042558		0.019037	5.05798	0.105569	0.0527844	4.75617	0.157637	0.0788187	0.019037	1.23269	1.23269	HIGH n-6/n-3 up vs Low n-6n-3
8568	17244191	NM_001080129 // Tmpo // thymopoietin // 10 C2|10 45.66 cM // 21917 /// NM_001080130 //	Tmpo	NM_001080129		0.00451423	6.53097	0.199572	0.099786	6.02305	0.114917	0.0574586	0.00451423	1.422	1.422	HIGH n-6/n-3 up vs Low n-6n-3
8576	17244261	ENSMUST00000157787 // Gm24241 // predicted gene, 24241 // --- // ---	Gm24241	ENSMUST00000157787		0.0355045	2.49014	0.178058	0.0890291	2.85998	0.207997	0.103999	0.0355045	0.773868	-1.29221	HIGH n-6/n-3 down vs Low n-6n-3																							0	0	0
8578	17244341	NM_013508 // Elk3 // ELK3, member of ETS oncogene family // 10 C-D1|10 48.04 cM // 1371	Elk3	NM_013508		0.00389892	6.36426	0.166744	0.0833722	5.80614	0.180072	0.0900359	0.00389892	1.47234	1.47234	HIGH n-6/n-3 up vs Low n-6n-3
8590	17244435	NR_015524 // Cep83os // centrosomal protein 83, opposite strand // 10 C2|10 // 67723 //	Cep83os	NR_015524		0.0281069	3.99906	0.150768	0.0753839	3.7178	0.124314	0.0621569	0.0281069	1.21525	1.21525	HIGH n-6/n-3 up vs Low n-6n-3
8599	17244524	ENSMUST00000099328 // Anapc15-ps // anaphase prompoting complex C subunit 15, pseudogen	Anapc15-ps	ENSMUST00000099328		0.0307528	5.10002	0.262637	0.131319	4.49373	0.342372	0.171186	0.0307528	1.52233	1.52233	HIGH n-6/n-3 up vs Low n-6n-3
8621	17244661	NM_177368 // Tmtc2 // transmembrane and tetratricopeptide repeat containing 2 // 10 D1|	Tmtc2	NM_177368		0.00750941	3.03961	0.165815	0.0829077	2.64567	0.110571	0.0552856	0.00750941	1.31398	1.31398	HIGH n-6/n-3 up vs Low n-6n-3
8652	17245032	ENSMUST00000157228 // Gm22794 // predicted gene, 22794 // --- // ---	Gm22794	ENSMUST00000157228		0.00976307	2.27815	0.196744	0.0983721	1.9091	0.0223265	0.0111632	0.00976307	1.29151	1.29151	HIGH n-6/n-3 up vs Low n-6n-3
8659	17245095	NM_001037848 // Cnot2 // CCR4-NOT transcription complex, subunit 2 // 10 D2|10 // 72068	Cnot2	NM_001037848		0.0318036	7.42444	0.178049	0.0890245	7.01394	0.234999	0.1175	0.0318036	1.32914	1.32914	HIGH n-6/n-3 up vs Low n-6n-3
8699	17245511	NM_001081056 // Xpot // exportin, tRNA (nuclear export receptor for tRNAs) // 10|10 D3	Xpot	NM_001081056		0.00767061	5.43714	0.0830022	0.0415011	5.04028	0.183853	0.0919265	0.00767061	1.31664	1.31664	HIGH n-6/n-3 up vs Low n-6n-3
8735	17246043	NM_001150749 // Rdh7 // retinol dehydrogenase 7 // 10 D3|10 // 54150 /// NM_017473 // R	Rdh7	NM_001150749		0.0142778	2.18096	0.0659475	0.0329737	2.42738	0.128494	0.0642468	0.0142778	0.842986	-1.18626	HIGH n-6/n-3 down vs Low n-6n-3
8759	17246299	NM_016756 // Cdk2 // cyclin-dependent kinase 2 // 10 D3|10 // 12566 /// NM_183417 // Cd	Cdk2	NM_016756		0.0410609	5.85911	0.20074	0.10037	5.50539	0.184798	0.0923992	0.0410609	1.27785	1.27785	HIGH n-6/n-3 up vs Low n-6n-3
8761	17246337	XM_006514220 // Tmem198b // transmembrane protein 198b // 10 D3|10 // 73827 /// XM_0065	Tmem198b	XM_006514220		0.010911	3.85918	0.367808	0.183904	3.12406	0.168487	0.0842436	0.010911	1.66453	1.66453	HIGH n-6/n-3 up vs Low n-6n-3
8791	17246445	NM_146670 // Olfr815 // olfactory receptor 815 // 10 D3|10 // 258665 /// ENSMUST0000007	Olfr815	NM_146670		0.0259473	2.57006	0.201681	0.10084	3.04717	0.254297	0.127148	0.0259473	0.718415	-1.39195	HIGH n-6/n-3 down vs Low n-6n-3
8843	17246963	XR_393785 // LOC102639290 // uncharacterized LOC102639290 // --- // 102639290 /// ENSMU	LOC102639290	XR_393785		0.00521016	2.57426	0.111114	0.055557	2.84034	0.0558417	0.0279209	0.00521016	0.831579	-1.20253	HIGH n-6/n-3 down vs Low n-6n-3
8846	17247015	NR_015577 // 2210015D19Rik // RIKEN cDNA 2210015D19 gene // 11 A1|11 // 76508 /// ENSMU	2210015D19Rik	NR_015577		0.0337517	4.40122	0.201086	0.100543	3.95503	0.25625	0.128125	0.0337517	1.36244	1.36244	HIGH n-6/n-3 up vs Low n-6n-3																							0	0	0
8850	17247067	NM_019661 // Ykt6 // YKT6 homolog (S. Cerevisiae) // 11 A1|11 // 56418 /// ENSMUST00000	Ykt6	NM_019661		0.0102182	6.50783	0.14722	0.0736099	6.15176	0.124854	0.0624268	0.0102182	1.27994	1.27994	HIGH n-6/n-3 up vs Low n-6n-3
8860	17247208	NM_008341 // Igfbp1 // insulin-like growth factor binding protein 1 // 11 A1|11 4.75 cM	Igfbp1	NM_008341		0.0497511	2.20918	0.0872515	0.0436257	2.34017	0.061764	0.030882	0.0497511	0.913208	-1.09504	HIGH n-6/n-3 down vs Low n-6n-3
8873	17247369	ENSMUST00000157884 // Gm22789 // predicted gene, 22789 // --- // ---	Gm22789	ENSMUST00000157884		0.0133974	1.91489	0.0667883	0.0333941	2.18091	0.138293	0.0691465	0.0133974	0.831614	-1.20248	HIGH n-6/n-3 down vs Low n-6n-3
8883	17247471	NM_020558 // C1d // C1D nuclear receptor co-repressor // 11 A2|11 // 57316 /// XM_00651	C1d	NM_020558		0.0320927	3.53584	0.142689	0.0713445	3.23068	0.167086	0.0835431	0.0320927	1.23556	1.23556	HIGH n-6/n-3 up vs Low n-6n-3
8901	17247627	NM_153596 // Tmem17 // transmembrane protein 17 // 11 A3.2|11 // 103765 /// XM_00651444	Tmem17	NM_153596		0.0380184	2.75137	0.133809	0.0669047	2.48432	0.1507	0.07535	0.0380184	1.20335	1.20335	HIGH n-6/n-3 up vs Low n-6n-3
8937	17247962	ENSMUST00000154924 // Pnpt1 // polyribonucleotide nucleotidyltransferase 1 // 11|11 A4	Pnpt1	ENSMUST00000154924		0.0241448	5.54639	0.201881	0.100941	5.18471	0.132492	0.0662458	0.0241448	1.28492	1.28492	HIGH n-6/n-3 up vs Low n-6n-3																							0	0	0
8939	17248017	ENSMUST00000116867 // Gm23109 // predicted gene, 23109 // --- // ---	Gm23109	ENSMUST00000116867		0.0326435	2.39776	0.215551	0.107775	2.75225	0.138886	0.069443	0.0326435	0.78215	-1.27853	HIGH n-6/n-3 down vs Low n-6n-3
9013	17248512	ENSMUST00000127057 // Nudcd2 // NudC domain containing 2 // 11 A5|11 24.41 cM // 52653	Nudcd2	ENSMUST00000127057		0.00341277	5.63721	0.110094	0.0550471	5.31164	0.0853031	0.0426515	0.00341277	1.25316	1.25316	HIGH n-6/n-3 up vs Low n-6n-3
9048	17248860	NM_178759 // Timd4 // T cell immunoglobulin and mucin domain containing 4 // 11 B1.1|11	Timd4	NM_178759		0.0211132	6.63793	0.403636	0.201818	5.8497	0.309296	0.154648	0.0211132	1.72695	1.72695	HIGH n-6/n-3 up vs Low n-6n-3
9083	17249110	NM_001290759 // Tbc1d9b // TBC1 domain family, member 9B // 11 B1.3|11 // 76795 /// NM_	Tbc1d9b	NM_001290759		0.0167758	5.11494	0.118549	0.0592743	4.76915	0.174191	0.0870957	0.0167758	1.27085	1.27085	HIGH n-6/n-3 up vs Low n-6n-3
9085	17249151	NM_145926 // Mgat4b // mannoside acetylglucosaminyltransferase 4, isoenzyme B // 11 B1.	Mgat4b	NM_145926		0.0435156	6.87397	0.196182	0.0980909	6.49039	0.22815	0.114075	0.0435156	1.30458	1.30458	HIGH n-6/n-3 up vs Low n-6n-3
9104	17249355	NR_027958 // D930048N14Rik // RIKEN cDNA D930048N14 gene // 11 B1.3|11 // 97775 /// ENS	D930048N14Rik	NR_027958		0.0274101	3.04906	0.0972323	0.0486161	2.76527	0.17002	0.0850098	0.0274101	1.21739	1.21739	HIGH n-6/n-3 up vs Low n-6n-3
9143	17249798	XR_388652 // LOC102633930 // uncharacterized LOC102633930 // --- // 102633930	LOC102633930	XR_388652		0.0451595	2.58693	0.158301	0.0791507	2.26412	0.20117	0.100585	0.0451595	1.25076	1.25076	HIGH n-6/n-3 up vs Low n-6n-3																							0	0	0
9158	17249916	ENSMUST00000083872 // n-R5s69 // nuclear encoded rRNA 5S 69 // --- // ---	n-R5s69	ENSMUST00000083872		0.011058	2.87358	0.194486	0.0972432	3.24794	0.0698798	0.0349399	0.011058	0.771448	-1.29626	HIGH n-6/n-3 down vs Low n-6n-3
9201	17250178	ENSMUST00000108817 // Hist3h2a // histone cluster 3, H2a // 11 B2|11 // 319162 /// BC05	Hist3h2a	ENSMUST00000108817		0.0052368	2.44136	0.138843	0.0694217	2.09672	0.0820056	0.0410028	0.0052368	1.26984	1.26984	HIGH n-6/n-3 up vs Low n-6n-3
9223	17250374	NM_021354 // Drg2 // developmentally regulated GTP binding protein 2 // 11 B2|11 37.81	Drg2	NM_021354		0.00284315	6.31871	0.160783	0.0803916	5.86651	0.0942255	0.0471128	0.00284315	1.36812	1.36812	HIGH n-6/n-3 up vs Low n-6n-3
9235	17250530	XR_388709 // LOC102639276 // uncharacterized LOC102639276 // --- // 102639276 /// ENSMU	LOC102639276	XR_388709		0.0334313	3.11703	0.190586	0.0952929	2.74816	0.189235	0.0946173	0.0334313	1.29134	1.29134	HIGH n-6/n-3 up vs Low n-6n-3
9265	17250775	NM_053169 // Trim16 // tripartite motif-containing 16 // 11 B2|11 // 94092 /// ENSMUST0	Trim16	NM_053169		0.0102974	4.7697	0.174086	0.0870429	4.37088	0.128871	0.0644355	0.0102974	1.31844	1.31844	HIGH n-6/n-3 up vs Low n-6n-3
9271	17250849	ENSMUST00000123420 // B430319H21Rik // RIKEN cDNA B430319H21 gene // --- // --- /// AK0	B430319H21Rik	ENSMUST00000123420		0.00644401	2.69204	0.127402	0.0637009	2.34632	0.11125	0.0556251	0.00644401	1.27078	1.27078	HIGH n-6/n-3 up vs Low n-6n-3
9311	17251454	NM_001013256 // Ctc1 // CTS telomere maintenance complex component 1 // 11 B3|11 // 689	Ctc1	NM_001013256		0.0161431	5.12567	0.219542	0.109771	4.59346	0.234568	0.117284	0.0161431	1.44614	1.44614	HIGH n-6/n-3 up vs Low n-6n-3
9312	17251485	NM_011496 // Aurkb // aurora kinase B // 11 B3|11 42.32 cM // 20877 /// ENSMUST00000021	Aurkb	NM_011496		0.0331865	3.3115	0.192311	0.0961554	2.91783	0.211764	0.105882	0.0331865	1.31373	1.31373	HIGH n-6/n-3 up vs Low n-6n-3
9316	17251516	ENSMUST00000158162 // Gm25371 // predicted gene, 25371 // --- // ---	Gm25371	ENSMUST00000158162		0.0237696	2.39267	0.133038	0.066519	2.98814	0.372942	0.186471	0.0237696	0.661827	-1.51097	HIGH n-6/n-3 down vs Low n-6n-3																							0	0	0
9341	17251767	NM_001013414 // Neurl4 // neuralized homolog 4 (Drosophila) // 11 B3|11 // 216860 /// N	Neurl4	NM_001013414		0.0317001	4.97597	0.0922802	0.0461401	4.70516	0.171032	0.0855162	0.0317001	1.20649	1.20649	HIGH n-6/n-3 up vs Low n-6n-3
9385	17252341	NM_001037713 // Xaf1 // XIAP associated factor 1 // 11 B4|11 // 327959 /// NM_001291153	Xaf1	NM_001037713		0.0370204	5.10142	0.75194	0.37597	4.05516	0.220782	0.110391	0.0370204	2.06518	2.06518	HIGH n-6/n-3 up vs Low n-6n-3
9444	17252906	NR_029739 // Mir22 // microRNA 22 // 11|11 // 387141 /// NR_030711 // Mir22hg // Mir22	Mir22	NR_029739		0.0275251	4.05098	0.254397	0.127198	3.53729	0.247489	0.123745	0.0275251	1.4277	1.4277	HIGH n-6/n-3 up vs Low n-6n-3																							0	0	0
9448	17252980	NM_001004157 // Scarf1 // scavenger receptor class F, member 1 // 11 B5|11 // 380713 //	Scarf1	NM_001004157		0.039829	4.4553	0.304904	0.152452	4.0251	0.123507	0.0617533	0.039829	1.34742	1.34742	HIGH n-6/n-3 up vs Low n-6n-3
9458	17253133	NM_027773 // Fam57a // family with sequence similarity 57, member A // 11 B5|11 // 1169	Fam57a	NM_027773		0.0205564	5.512	0.0622258	0.0311129	5.03126	0.301708	0.150854	0.0205564	1.39546	1.39546	HIGH n-6/n-3 up vs Low n-6n-3
9495	17253630	NM_011676 // Unc119 // unc-119 homolog (C. elegans) // 11 B5|11 46.74 cM // 22248 /// E	Unc119	NM_011676		0.0117084	5.8123	0.23467	0.117335	5.24957	0.209799	0.1049	0.0117084	1.47705	1.47705	HIGH n-6/n-3 up vs Low n-6n-3
9529	17254041	NM_011333 // Ccl2 // chemokine (C-C motif) ligand 2 // 11 C-E1|11 49.82 cM // 20296 ///	Ccl2	NM_011333		0.0496941	3.55072	0.401448	0.200724	3.0332	0.130804	0.0654019	0.0496941	1.4315	1.4315	HIGH n-6/n-3 up vs Low n-6n-3
9530	17254047	NM_013654 // Ccl7 // chemokine (C-C motif) ligand 7 // 11 C|11 49.83 cM // 20306 /// EN	Ccl7	NM_013654		0.0287072	3.29654	0.112129	0.0560644	2.97359	0.195807	0.0979034	0.0287072	1.25088	1.25088	HIGH n-6/n-3 up vs Low n-6n-3																							0	0	0
9563	17254395	NM_133360 // Acaca // acetyl-Coenzyme A carboxylase alpha // 11 C|11 // 107476 /// ENSM	Acaca	NM_133360		0.0335852	6.23567	0.170974	0.0854871	6.05172	0.307345	0.153673	0.335852	1.13598	1.13598	HIGH n-6/n-3 up vs Low n-6n-3																							0	0	0
9567	17254473	XM_006533927 // Myo19 // myosin XIX // 11|11 B5 // 66196 /// ENSMUST00000141705 // Myo1	Myo19	XM_006533927		0.0047578	4.1687	0.159206	0.0796031	3.75984	0.0989382	0.0494691	0.0047578	1.32764	1.32764	HIGH n-6/n-3 up vs Low n-6n-3
9608	17254916	NM_001078167 // Srsf1 // serine/arginine-rich splicing factor 1 // 11 C|11 52.4 cM // 1	Srsf1	NM_001078167		0.0355461	7.54771	0.262337	0.131169	7.07469	0.232145	0.116073	0.0355461	1.38801	1.38801	HIGH n-6/n-3 up vs Low n-6n-3
9638	17255210	NM_009427 // Tob1 // transducer of ErbB-2.1 // 11|11 C // 22057 /// ENSMUST00000041589	Tob1	NM_009427		0.0369174	7.53489	0.243346	0.121673	7.03728	0.281936	0.140968	0.0369174	1.41187	1.41187	HIGH n-6/n-3 up vs Low n-6n-3
9669	17255466	NM_001284397 // Gngt2 // guanine nucleotide binding protein (G protein), gamma transduc	Gngt2	NM_001284397		0.0189663	4.70081	0.202709	0.101355	4.3226	0.12381	0.0619051	0.0189663	1.29973	1.29973	HIGH n-6/n-3 up vs Low n-6n-3
9734	17256113	NM_009439 // Psmd3 // proteasome (prosome, macropain) 26S subunit, non-ATPase, 3 // 11	Psmd3	NM_009439		0.0115177	6.61526	0.10561	0.0528049	6.26276	0.165629	0.0828145	0.0115177	1.27677	1.27677	HIGH n-6/n-3 up vs Low n-6n-3
9768	17256414	NM_028024 // Nkiras2 // NFKB inhibitor interacting Ras-like protein 2 // 11 D|11 // 719	Nkiras2	NM_028024		0.0141579	4.72163	0.159054	0.0795268	4.38892	0.112138	0.0560692	0.0141579	1.25937	1.25937	HIGH n-6/n-3 up vs Low n-6n-3
9962	17258186	NM_026729 // Ict1 // immature colon carcinoma transcript 1 // 11 E2|11 // 68572 /// XM_	Ict1	NM_026729		0.0473849	7.02221	0.204621	0.102311	6.61475	0.256013	0.128007	0.0473849	1.32635	1.32635	HIGH n-6/n-3 up vs Low n-6n-3
10014	17258842	NM_009304 // Syngr2 // synaptogyrin 2 // 11 E2|11 // 20973 /// ENSMUST00000026649 // Sy	Syngr2	NM_009304		0.0169975	7.72382	0.117144	0.0585721	7.32507	0.213758	0.106879	0.0169975	1.31836	1.31836	HIGH n-6/n-3 up vs Low n-6n-3
10016	17258867	NM_001012273 // Birc5 // baculoviral IAP repeat-containing 5 // 11|11 E2 // 11799 /// E	Birc5	NM_001012273		0.00623433	3.4976	0.173139	0.0865695	2.95139	0.201036	0.100518	0.00623433	1.46024	1.46024	HIGH n-6/n-3 up vs Low n-6n-3
10091	17259613	NM_181420 // Fn3krp // fructosamine 3 kinase related protein // 11 E2|11 // 238024 ///	Fn3krp	NM_181420		0.0291639	4.54139	0.139063	0.0695315	4.81868	0.136067	0.0680333	0.0291639	0.82514	-1.21192	HIGH n-6/n-3 down vs Low n-6n-3
10156	17260438	ENSMUST00000082561 // Gm24313 // predicted gene, 24313 // --- // ---	Gm24313	ENSMUST00000082561		0.00849758	3.24516	0.53638	0.26819	5.28281	0.913779	0.456889	0.00849758	0.243559	-4.10578	HIGH n-6/n-3 down vs Low n-6n-3
10231	17261098	XM_006514817 // Pex13 // peroxisomal biogenesis factor 13 // 11|11 A3.3 // 72129 /// NM	Pex13	XM_006514817		0.0423008	5.39999	0.134896	0.0674482	5.06926	0.219125	0.109563	0.0423008	1.25765	1.25765	HIGH n-6/n-3 up vs Low n-6n-3
10249	17261231	ENSMUST00000042595 // Gm6685 // predicted pseudogene 6685 // --- // ---	Gm6685	ENSMUST00000042595		0.0222494	3.6504	0.0978146	0.0489073	3.33312	0.182917	0.0914587	0.0222494	1.24598	1.24598	HIGH n-6/n-3 up vs Low n-6n-3																							0	0	0
10263	17261417	NM_001290667 // Chac2 // ChaC, cation transport regulator 2 // 11 A4|11 // 68044 /// NM	Chac2	NM_001290667		0.00632809	4.31344	0.140898	0.0704491	3.85345	0.174347	0.0871737	0.00632809	1.37554	1.37554	HIGH n-6/n-3 up vs Low n-6n-3
10332	17262193	ENSMUST00000104959 // Cdk2ap1 // CDK2 (cyclin-dependent kinase 2)-associated protein 1	Cdk2ap1	ENSMUST00000104959		0.0152281	4.29864	0.370965	0.185483	3.61021	0.174064	0.0870318	0.0152281	1.61153	1.61153	HIGH n-6/n-3 up vs Low n-6n-3
10383	17262478	ENSMUST00000101249 // Hnrnpab // heterogeneous nuclear ribonucleoprotein A/B // 11 B1.3	Hnrnpab	ENSMUST00000101249		0.0470525	9.23946	0.0813285	0.0406642	8.85002	0.301821	0.15091	0.0470525	1.30988	1.30988	HIGH n-6/n-3 up vs Low n-6n-3
10384	17262491	NM_025346 // Rmnd5b // required for meiotic nuclear division 5 homolog B (S. cerevisiae	Rmnd5b	NM_025346		0.00321323	4.50557	0.130364	0.0651819	4.08503	0.120744	0.0603721	0.00321323	1.33843	1.33843	HIGH n-6/n-3 up vs Low n-6n-3
10429	17262942	ENSMUST00000125560 // Slc36a2 // solute carrier family 36 (proton/amino acid symporter)	Slc36a2	ENSMUST00000125560		0.0309524	6.88828	0.101889	0.0509447	6.56536	0.20646	0.10323	0.0309524	1.25086	1.25086	HIGH n-6/n-3 up vs Low n-6n-3
10431	17262964	NM_001029988 // Fat2 // FAT tumor suppressor homolog 2 (Drosophila) // 11 B1.3|11 // 24	Fat2	NM_001029988		0.0408257	1.96125	0.0993695	0.0496848	2.22646	0.178444	0.0892221	0.0408257	0.832075	-1.20182	HIGH n-6/n-3 down vs Low n-6n-3																							0	0	0
10433	17263004	NM_009720 // Atox1 // ATX1 (antioxidant protein 1) homolog 1 (yeast) // 11 B1.3|11 33.0	Atox1	NM_009720		0.0288739	7.05016	0.26899	0.134495	6.48697	0.288029	0.144015	0.0288739	1.47753	1.47753	HIGH n-6/n-3 up vs Low n-6n-3
10450	17263089	NM_001166669 // Gemin5 // gem (nuclear organelle) associated protein 5 // 11 B1.3|11 //	Gemin5	NM_001166669		0.00317868	4.77239	0.119497	0.0597487	4.36384	0.124045	0.0620227	0.00317868	1.32735	1.32735	HIGH n-6/n-3 up vs Low n-6n-3
10469	17263220	XR_106232 // 2310058D17Rik // RIKEN cDNA 2310058D17 gene // 11|11 // 75694 /// ENSMUST0	2310058D17Rik	XR_106232		0.0154831	2.85988	0.126526	0.0632629	3.15193	0.120222	0.0601112	0.0154831	0.816738	-1.22438	HIGH n-6/n-3 down vs Low n-6n-3
10492	17263535	NM_011480 // Srebf1 // sterol regulatory element binding transcription factor 1 // 11 B	Srebf1	NM_011480		0.0361248	6.06607	0.131673	0.0658364	5.69443	0.243099	0.12155	0.0361248	1.29383	1.29383	HIGH n-6/n-3 up vs Low n-6n-3
10551	17264342	NM_175681 // Glp2r // glucagon-like peptide 2 receptor // 11 B3|11 // 93896 /// ENSMUST	Glp2r	NM_175681		0.00354852	2.06237	0.0406148	0.0203074	2.2182	0.0535362	0.0267681	0.00354852	0.897617	-1.11406	HIGH n-6/n-3 down vs Low n-6n-3
10606	17265164	NM_007528 // Bcl6b // B cell CLL/lymphoma 6, member B // 11|11 B4 // 12029 /// ENSMUST0	Bcl6b	NM_007528		0.0493077	5.17498	0.211406	0.105703	4.76294	0.260349	0.130175	0.0493077	1.33056	1.33056	HIGH n-6/n-3 up vs Low n-6n-3
10607	17265175	NM_001177601 // 0610010K14Rik // RIKEN cDNA 0610010K14 gene // 11 B3|11 // 104457 /// N	0610010K14Rik	NM_001177601		0.049442	5.71864	0.244501	0.12225	5.26832	0.273464	0.136732	0.049442	1.36634	1.36634	HIGH n-6/n-3 up vs Low n-6n-3
10618	17265306	NM_024211 // Slc25a11 // solute carrier family 25 (mitochondrial carrier oxoglutarate c	Slc25a11	NM_024211		0.0352833	8.37206	0.209934	0.104967	7.88924	0.288529	0.144265	0.0352833	1.39747	1.39747	HIGH n-6/n-3 up vs Low n-6n-3
10621	17265329	NM_001167669 // Spag7 // sperm associated antigen 7 // 11 B4|11 43.21 cM // 216873 ///	Spag7	NM_001167669		0.0484961	4.25848	0.248302	0.124151	3.86021	0.205896	0.102948	0.0484961	1.31793	1.31793	HIGH n-6/n-3 up vs Low n-6n-3
10700	17266079	NM_026029 // Glod4 // glyoxalase domain containing 4 // 11 B5|11 // 67201 /// XM_006533	Glod4	NM_026029		0.0384071	5.15479	0.197723	0.0988613	4.83006	0.145972	0.072986	0.0384071	1.25243	1.25243	HIGH n-6/n-3 up vs Low n-6n-3
10705	17266182	ENSMUST00000138817 // Gm12343 // predicted gene 12343 // --- // ---	Gm12343	ENSMUST00000138817		0.0211288	2.24714	0.126361	0.0631807	2.54057	0.14101	0.0705048	0.0211288	0.815955	-1.22556	HIGH n-6/n-3 down vs Low n-6n-3
10735	17266475	NM_001159392 // Tnfaip1 // tumor necrosis factor, alpha-induced protein 1 (endothelial)	Tnfaip1	NM_001159392		0.0357284	6.09775	0.206138	0.103069	5.72897	0.179744	0.0898722	0.0357284	1.29126	1.29126	HIGH n-6/n-3 up vs Low n-6n-3
10736	17266489	NM_133706 // Tmem97 // transmembrane protein 97 // 11 B5|11 46.74 cM // 69071 /// ENSMU	Tmem97	NM_133706		0.0338271	3.82326	0.113347	0.0566737	3.49733	0.209367	0.104684	0.0338271	1.25347	1.25347	HIGH n-6/n-3 up vs Low n-6n-3
10741	17266534	NM_013571 // Ksr1 // kinase suppressor of ras 1 // 11 B5|11 46.74 cM // 16706 /// XM_00	Ksr1	NM_013571		0.00410272	4.20846	0.0185738	0.00928691	3.9132	0.129897	0.0649485	0.00410272	1.22711	1.22711	HIGH n-6/n-3 up vs Low n-6n-3
10746	17266590	NM_001033711 // Evi2a // ecotropic viral integration site 2a // 11 B5|11 46.81 cM // 14	Evi2a	NM_001033711		0.0119221	5.14399	0.144548	0.0722742	4.64424	0.240657	0.120328	0.0119221	1.41397	1.41397	HIGH n-6/n-3 up vs Low n-6n-3
10766	17266754	NM_011329 // Ccl1 // chemokine (C-C motif) ligand 1 // 11 C|11 49.99 cM // 20290 /// EN	Ccl1	NM_011329		0.017083	2.10816	0.0553237	0.0276618	2.21948	0.0397701	0.019885	0.017083	0.925739	-1.08022	HIGH n-6/n-3 down vs Low n-6n-3
10794	17267021	NM_019816 // Aatf // apoptosis antagonizing transcription factor // 11|11 B5 // 56321 /	Aatf	NM_019816		0.00622261	5.25208	0.13548	0.0677398	4.7618	0.195743	0.0978716	0.00622261	1.40472	1.40472	HIGH n-6/n-3 up vs Low n-6n-3
10878	17268047	NM_145828 // Xylt2 // xylosyltransferase II // 11 D|11 // 217119 /// XR_388413 // Xylt2	Xylt2	NM_145828		0.00102436	4.33871	0.0939062	0.0469531	3.99501	0.0679149	0.0339574	0.00102436	1.26901	1.26901	HIGH n-6/n-3 up vs Low n-6n-3
10895	17268205	NM_130858 // Nxph3 // neurexophilin 3 // 11|11 C // 104079 /// ENSMUST00000058866 // Nx	Nxph3	NM_130858		0.0113369	2.62865	0.116803	0.0584016	2.91329	0.106458	0.053229	0.0113369	0.820945	-1.21811	HIGH n-6/n-3 down vs Low n-6n-3
10899	17268227	NM_025659 // Abi3 // ABI gene family, member 3 // 11 D|11 // 66610 /// XM_006533953 //	Abi3	NM_025659		0.033654	5.11668	0.206489	0.103245	4.64534	0.274902	0.137451	0.033654	1.3864	1.3864	HIGH n-6/n-3 up vs Low n-6n-3
10902	17268255	NM_009951 // Igf2bp1 // insulin-like growth factor 2 mRNA binding protein 1 // 11 D|11	Igf2bp1	NM_009951		0.0243375	2.03145	0.0272089	0.0136044	2.07986	0.0175625	0.00878127	0.0243375	0.967004	-1.03412	HIGH n-6/n-3 down vs Low n-6n-3
10966	17268849	NM_011869 // Med24 // mediator complex subunit 24 // 11 D|11 62.46 cM // 23989 /// ENSM	Med24	NM_011869		0.0260637	4.88724	0.211148	0.105574	4.53518	0.11362	0.0568099	0.0260637	1.27638	1.27638	HIGH n-6/n-3 up vs Low n-6n-3
10972	17268909	NM_011623 // Top2a // topoisomerase (DNA) II alpha // 11 D|11 62.91 cM // 21973 /// ENS	Top2a	NM_011623		0.0122892	5.62935	0.141179	0.0705897	5.327	0.0965668	0.0482834	0.0122892	1.23315	1.23315	HIGH n-6/n-3 up vs Low n-6n-3
11057	17269521	NM_001199296 // Acly // ATP citrate lyase // 11 D|11 // 104112 /// NM_134037 // Acly //	Acly	NM_001199296		0.0282667	7.39742	0.16116	0.0805799	7.13645	0.0836599	0.0418299	0.0282667	1.19828	1.19828	HIGH n-6/n-3 up vs Low n-6n-3
11132	17270267	ENSMUST00000174900 // Gm23563 // predicted gene, 23563 // --- // ---	Gm23563	ENSMUST00000174900		0.0336434	3.87149	0.298815	0.149407	3.249	0.34183	0.170915	0.0336434	1.53952	1.53952	HIGH n-6/n-3 up vs Low n-6n-3
11145	17270398	NM_026551 // Dcakd // dephospho-CoA kinase domain containing // 11 E1|11 // 68087 /// E	Dcakd	NM_026551		0.000972411	4.65241	0.105483	0.0527416	4.23224	0.0924646	0.0462323	0.000972411	1.33808	1.33808	HIGH n-6/n-3 up vs Low n-6n-3
11176	17270761	NM_026009 // Ccdc47 // coiled-coil domain containing 47 // 11 E1|11 // 67163 /// ENSMUS	Ccdc47	NM_026009		0.0364889	4.86844	0.097161	0.0485805	4.56014	0.208456	0.104228	0.0364889	1.23824	1.23824	HIGH n-6/n-3 up vs Low n-6n-3
11251	17271842	ENSMUST00000056153 // Fads6 // fatty acid desaturase domain family, member 6 // 11 E2|1	Fads6	ENSMUST00000056153		0.0272872	2.39785	0.0875775	0.0437887	2.5797	0.0896952	0.0448476	0.0272872	0.881569	-1.13434	HIGH n-6/n-3 down vs Low n-6n-3
11259	17271920	NM_008258 // Hn1 // hematological and neurological expressed sequence 1 // 11 E2|11 80.	Hn1	NM_008258		0.0373844	6.40923	0.155909	0.0779547	6.06084	0.210148	0.105074	0.0373844	1.27313	1.27313	HIGH n-6/n-3 up vs Low n-6n-3
11295	17272530	NM_011358 // Srsf2 // serine/arginine-rich splicing factor 2 // 11 E2|11 81.49 cM // 20	Srsf2	NM_011358		0.0107719	8.44308	0.228302	0.114151	7.90142	0.190305	0.0951525	0.0107719	1.45565	1.45565	HIGH n-6/n-3 up vs Low n-6n-3
11352	17273200	NM_024229 // Pcyt2 // phosphate cytidylyltransferase 2, ethanolamine // 11 E2|11 // 686	Pcyt2	NM_024229		0.00603675	6.11047	0.14486	0.07243	5.79364	0.0487141	0.024357	0.00603675	1.24559	1.24559	HIGH n-6/n-3 up vs Low n-6n-3																							0	0	0
11364	17273348	NM_007988 // Fasn // fatty acid synthase // 11 E2|11 84.56 cM // 14104 /// ENSMUST00000	Fasn	NM_007988		0.0108122	8.50442	0.528988	0.264494	7.91951	0.323353	0.161676	0.108122	1.49995	1.49995	HIGH n-6/n-3 up vs Low n-6n-3
11374	17273485	NM_025402 // Ogfod3 // 2-oxoglutarate and iron-dependent oxygenase domain containing 3	Ogfod3	NM_025402		0.0314289	5.12095	0.291672	0.145836	4.68586	0.10934	0.0546701	0.0314289	1.352	1.352	HIGH n-6/n-3 up vs Low n-6n-3
11468	17274448	NM_018813 // Cpsf3 // cleavage and polyadenylation specificity factor 3 // 12 A1.2-A1.3	Cpsf3	NM_018813		0.0359001	7.01199	0.118945	0.0594724	6.73444	0.168329	0.0841645	0.0359001	1.21213	1.21213	HIGH n-6/n-3 up vs Low n-6n-3
11554	17275351	NM_029825 // Scfd1 // Sec1 family domain containing 1 // 12|12 C1 // 76983 /// ENSMUST0	Scfd1	NM_029825		0.0101367	6.03593	0.15051	0.0752549	5.63699	0.15476	0.0773801	0.0101367	1.31854	1.31854	HIGH n-6/n-3 up vs Low n-6n-3
11564	17275470	ENSMUST00000158297 // Gm24296 // predicted gene, 24296 // --- // ---	Gm24296	ENSMUST00000158297		0.0347179	3.52341	0.202639	0.101319	4.27997	0.518433	0.259216	0.0347179	0.591906	-1.68946	HIGH n-6/n-3 down vs Low n-6n-3
11600	17275785	NM_177805 // Fam179b // family with sequence similarity 179, member B // 12 C1|12 // 32	Fam179b	NM_177805		0.0428159	5.24998	0.112801	0.0564007	4.85352	0.288254	0.144127	0.0428159	1.31627	1.31627	HIGH n-6/n-3 up vs Low n-6n-3
11622	17275976	NR_036607 // Gm3086 // RuvB-like protein 1 pseudogene // 12 C2|12 // 100040999 /// ENSM	Gm3086	NR_036607		0.0315543	2.71009	0.20117	0.100585	3.03962	0.123722	0.0618612	0.0315543	0.795799	-1.2566	HIGH n-6/n-3 down vs Low n-6n-3
11626	17276007	NM_028339 // Tmx1 // thioredoxin-related transmembrane protein 1 // 12 C2|12 // 72736 /	Tmx1	NM_028339		0.0221546	6.72059	0.160958	0.0804792	6.30633	0.217454	0.108727	0.0221546	1.33262	1.33262	HIGH n-6/n-3 up vs Low n-6n-3
11664	17276520	NM_138745 // Mthfd1 // methylenetetrahydrofolate dehydrogenase (NADP+ dependent), methe	Mthfd1	NM_138745		0.0204555	5.21147	0.0363349	0.0181674	4.98087	0.143045	0.0715227	0.0204555	1.17333	1.17333	HIGH n-6/n-3 up vs Low n-6n-3
11705	17276983	ENSMUST00000082780 // n-R5s62 // nuclear encoded rRNA 5S 62 // --- // ---	n-R5s62	ENSMUST00000082780		0.00518265	1.90154	0.22171	0.110855	2.47187	0.147443	0.0737214	0.00518265	0.673461	-1.48487	HIGH n-6/n-3 down vs Low n-6n-3
11708	17277039	AK042770 // Gm10006 // predicted gene 10006 // --- // 791340	Gm10006	AK042770		0.00690587	2.08294	0.05748	0.02874	2.3486	0.118772	0.0593861	0.00690587	0.831816	-1.20219	HIGH n-6/n-3 down vs Low n-6n-3
11712	17277084	NM_008943 // Psen1 // presenilin 1 // 12 D1|12 38.84 cM // 19164 /// ENSMUST00000101225	Psen1	NM_008943		0.0256589	6.26819	0.0705067	0.0352533	5.98317	0.180009	0.0900045	0.0256589	1.21843	1.21843	HIGH n-6/n-3 up vs Low n-6n-3
11723	17277195	ENSMUST00000123693 // Ptgr2 // prostaglandin reductase 2 // 12|12 D3 // 77219 /// ENSMU	Ptgr2	ENSMUST00000123693		0.03664	7.11505	0.204002	0.102001	6.77999	0.144931	0.0724655	0.03664	1.26143	1.26143	HIGH n-6/n-3 up vs Low n-6n-3
11732	17277294	NM_028863 // Isca2 // iron-sulfur cluster assembly 2 homolog (S. cerevisiae) // 12|12 D	Isca2	NM_028863		0.0285378	6.47395	0.176671	0.0883356	6.15168	0.139022	0.069511	0.0285378	1.2503	1.2503	HIGH n-6/n-3 up vs Low n-6n-3
11808	17278073	NM_001199004 // Golga5 // golgi autoantigen, golgin subfamily a, 5 // 12|12 F1 // 27277	Golga5	NM_001199004		0.0189062	6.35969	0.148066	0.0740331	5.9604	0.202145	0.101072	0.0189062	1.31886	1.31886	HIGH n-6/n-3 up vs Low n-6n-3
11870	17278647	NM_001190703 // Dlk1 // delta-like 1 homolog (Drosophila) // 12 E-F1|12 60.17 cM // 133	Dlk1	NM_001190703		0.00526358	4.10061	0.204081	0.10204	3.36544	0.27736	0.13868	0.00526358	1.6646	1.6646	HIGH n-6/n-3 up vs Low n-6n-3
11871	17278662	NR_003633 // Meg3 // maternally expressed 3 // 12 F1|12 60.25 cM // 17263 /// NR_027651	Meg3	NR_003633		0.0361559	4.58368	0.254654	0.127327	4.07173	0.283308	0.141654	0.0361559	1.42598	1.42598	HIGH n-6/n-3 up vs Low n-6n-3
11874	17278692	NR_029765 // Mir337 // microRNA 337 // 12|12 // 723843 /// ENSMUST00000083592 // Mir337	Mir337	NR_029765		0.0259262	2.37353	0.253516	0.126758	1.96728	0.109861	0.0549305	0.0259262	1.32523	1.32523	HIGH n-6/n-3 up vs Low n-6n-3
11879	17278702	NR_029951 // Mir431 // microRNA 431 // 12|12 // 723866 /// ENSMUST00000093572 // Mir431	Mir431	NR_029951		0.0213713	2.97097	0.128402	0.0642009	2.58265	0.216014	0.108007	0.0213713	1.30887	1.30887	HIGH n-6/n-3 up vs Low n-6n-3
11890	17278757	ENSMUST00000082518 // Gm24564 // predicted gene, 24564 // --- // ---	Gm24564	ENSMUST00000082518		0.00437422	5.25081	0.464153	0.232077	4.02606	0.298119	0.14906	0.00437422	2.33715	2.33715	HIGH n-6/n-3 up vs Low n-6n-3
11891	17278759	ENSMUST00000158884 // Gm23474 // predicted gene, 23474 // --- // --- /// ENSMUST0000018	Gm23474	ENSMUST00000158884		0.019935	4.82705	0.278297	0.139148	3.95975	0.476138	0.238069	0.019935	1.82425	1.82425	HIGH n-6/n-3 up vs Low n-6n-3
11908	17278793	XR_394816 // LOC102642047 // uncharacterized LOC102642047 // --- // 102642047 /// XR_39	LOC102642047	XR_394816		0.00706455	5.3719	0.649887	0.324944	3.65013	0.56239	0.281195	0.00706455	3.29842	3.29842	HIGH n-6/n-3 up vs Low n-6n-3
11911	17278799	XR_394816 // LOC102642047 // uncharacterized LOC102642047 // --- // 102642047 /// XR_39	LOC102642047	XR_394816		0.00671126	2.95393	0.102073	0.0510363	2.46116	0.220769	0.110384	0.00671126	1.40714	1.40714	HIGH n-6/n-3 up vs Low n-6n-3
11929	17278836	NR_030578 // Mir654 // microRNA 654 // 12|12 // 100124453 /// ENSMUST00000104787 // Mir	Mir654	NR_030578		0.0296288	3.78473	0.29357	0.146785	3.31127	0.15846	0.0792302	0.0296288	1.38843	1.38843	HIGH n-6/n-3 up vs Low n-6n-3
11937	17278852	NR_029883 // Mir382 // microRNA 382 // 12|12 // 723912 /// ENSMUST00000083494 // Mir382	Mir382	NR_029883		0.0287363	4.20817	0.374955	0.187478	3.65949	0.0802932	0.0401466	0.0287363	1.46274	1.46274	HIGH n-6/n-3 up vs Low n-6n-3
12017	17279553	NM_001004066 // Zfp386 // zinc finger protein 386 (Kruppel-like) // 12 F2|12 // 56220 /	Zfp386	NM_001004066		0.0326317	4.31155	0.224972	0.112486	3.90257	0.192077	0.0960383	0.0326317	1.32775	1.32775	HIGH n-6/n-3 up vs Low n-6n-3
12038	17279789	NM_134046 // Cenpo // centromere protein O // 12 A1.1|12 2.02 cM // 52504 /// XM_006515	Cenpo	NM_134046		0.00837042	3.81371	0.143031	0.0715157	3.40912	0.153323	0.0766617	0.00837042	1.32372	1.32372	HIGH n-6/n-3 up vs Low n-6n-3
12072	17280035	ENSMUST00000166583 // Gm6736 // predicted gene 6736 // --- // ---	Gm6736	ENSMUST00000166583		0.0409589	5.70895	0.144012	0.0720062	5.32692	0.256869	0.128435	0.0409589	1.30318	1.30318	HIGH n-6/n-3 up vs Low n-6n-3
12086	17280184	ENSMUST00000079237 // Zfp125 // zinc finger protein 125 // --- // --- /// AJ005350 // Z	Zfp125	ENSMUST00000079237		0.00345599	6.16374	0.255515	0.127758	5.24267	0.301283	0.150641	0.00345599	1.89352	1.89352	HIGH n-6/n-3 up vs Low n-6n-3
12124	17280483	NM_001110239 // Acp1 // acid phosphatase 1, soluble // 12 A2|12 // 11431 /// NM_021330	Acp1	NM_001110239		0.0138805	6.3094	0.120303	0.0601514	6.03362	0.106333	0.0531664	0.0138805	1.21065	1.21065	HIGH n-6/n-3 up vs Low n-6n-3
12153	17280760	NM_025840 // Bzw2 // basic leucine zipper and W2 domains 2 // 12|12 B2 // 66912 /// XM_	Bzw2	NM_025840		0.0129008	6.98768	0.181098	0.0905489	6.65734	0.0541561	0.027078	0.0129008	1.25731	1.25731	HIGH n-6/n-3 up vs Low n-6n-3
12182	17281025	NM_177171 // Heatr5a // HEAT repeat containing 5A // 12 C1|12 // 320487 /// ENSMUST0000	Heatr5a	NM_177171		0.00982913	5.46341	0.0831154	0.0415577	5.0513	0.205257	0.102628	0.00982913	1.33063	1.33063	HIGH n-6/n-3 up vs Low n-6n-3																							0	0	0
12230	17281428	NM_172578 // Mis18bp1 // MIS18 binding protein 1 // 12 C1|12 // 217653 /// ENSMUST00000	Mis18bp1	NM_172578		0.0025414	3.12216	0.166327	0.0831633	2.67646	0.0676709	0.0338355	0.0025414	1.36198	1.36198	HIGH n-6/n-3 up vs Low n-6n-3
12242	17281506	NM_011133 // Pole2 // polymerase (DNA directed), epsilon 2 (p59 subunit) // 12|12 C3 //	Pole2	NM_011133		0.00202854	3.59137	0.0722639	0.036132	3.1468	0.155219	0.0776093	0.00202854	1.3609	1.3609	HIGH n-6/n-3 up vs Low n-6n-3
12273	17281895	NM_029580 // Trmt5 // TRM5 tRNA methyltransferase 5 // 12|12 D1 // 76357 /// ENSMUST000	Trmt5	NM_029580		0.0182018	4.85269	0.230686	0.115343	4.3526	0.208413	0.104206	0.0182018	1.4143	1.4143	HIGH n-6/n-3 up vs Low n-6n-3
12284	17281971	NM_030750 // Sgpp1 // sphingosine-1-phosphate phosphatase 1 // 12 C3|12 // 81535 /// EN	Sgpp1	NM_030750		0.0221852	5.24918	0.134702	0.0673511	4.87764	0.201919	0.10096	0.0221852	1.29373	1.29373	HIGH n-6/n-3 up vs Low n-6n-3
12347	17282611	NM_178065 // Arel1 // apoptosis resistant E3 ubiquitin protein ligase 1 // 12 D2|12 //	Arel1	NM_178065		0.00111835	6.19839	0.094698	0.047349	5.58983	0.185951	0.0929756	0.00111835	1.52474	1.52474	HIGH n-6/n-3 up vs Low n-6n-3
12420	17283393	NM_028446 // Trip11 // thyroid hormone receptor interactor 11 // 12|12 F1 // 109181 ///	Trip11	NM_028446		0.0343298	5.38588	0.0829387	0.0414693	5.60767	0.139936	0.0699679	0.0343298	0.857504	-1.16618	HIGH n-6/n-3 down vs Low n-6n-3
12503	17283955	ENSMUST00000180523 // Gm26906 // predicted gene, 26906 // --- // ---	Gm26906	ENSMUST00000180523		0.0350647	3.33398	0.228453	0.114226	2.88586	0.238977	0.119489	0.0350647	1.36426	1.36426	HIGH n-6/n-3 up vs Low n-6n-3
12518	17284039	NM_026048 // Cinp // cyclin-dependent kinase 2 interacting protein // 12|12 F2 // 67236	Cinp	NM_026048		0.00576933	6.56573	0.167153	0.0835764	5.97169	0.229309	0.114654	0.00576933	1.50947	1.50947	HIGH n-6/n-3 up vs Low n-6n-3
12528	17284135	NM_028875 // Xrcc3 // X-ray repair complementing defective repair in Chinese hamster ce	Xrcc3	NM_028875		0.0143745	3.89866	0.112544	0.0562719	3.55796	0.165345	0.0826727	0.0143745	1.26638	1.26638	HIGH n-6/n-3 up vs Low n-6n-3
12531	17284170	NM_027360 // 2010107E04Rik // RIKEN cDNA 2010107E04 gene // 12 F1|12 // 70257 /// XM_00	2010107E04Rik	NM_027360		0.0377531	9.40695	0.309891	0.154945	8.64878	0.479633	0.239816	0.0377531	1.69135	1.69135	HIGH n-6/n-3 up vs Low n-6n-3
12572	17284408	ENSMUST00000180013 // Igh-VX24 // immunoglobulin heavy chain (X24 family) // 12 F2|12 /	Igh-VX24	ENSMUST00000180013		0.0181463	5.92331	0.151336	0.0756682	6.21085	0.0948819	0.0474409	0.0181463	0.819296	-1.22056	HIGH n-6/n-3 down vs Low n-6n-3
12631	17284568	ENSMUST00000103520 // Ighv8-5 // immunoglobulin heavy variable V8-5 // --- // ---	Ighv8-5	ENSMUST00000103520		0.0486837	2.14234	0.0740019	0.037001	2.42783	0.219343	0.109672	0.0486837	0.820461	-1.21883	HIGH n-6/n-3 down vs Low n-6n-3
12663	17284654	ENSMUST00000103547 // Ighv1-80 // immunoglobulin heavy variable 1-80 // --- // --- ///	Ighv1-80	ENSMUST00000103547		0.0420374	2.62526	0.251759	0.12588	3.26238	0.425966	0.212983	0.0420374	0.642996	-1.55522	HIGH n-6/n-3 down vs Low n-6n-3
12681	17284860	NR_001581 // Speer6-ps1 // spermatogenesis associated glutamate (E)-rich protein 6, pse	Speer6-ps1	NR_001581		0.0355195	2.3963	0.0744432	0.0372216	2.82165	0.306011	0.153006	0.0355195	0.744657	-1.3429	HIGH n-6/n-3 down vs Low n-6n-3
12697	17284995	XR_394896 // Gm5444 // predicted gene 5444 // 13 A1|13 // 432723 /// ENSMUST00000065956	Gm5444	XR_394896		0.00630988	2.51772	0.0622134	0.0311067	2.89844	0.174669	0.0873343	0.00630988	0.768052	-1.302	HIGH n-6/n-3 down vs Low n-6n-3
12699	17285007	NM_145131 // Pitrm1 // pitrilysin metallepetidase 1 // 13 A1|13 // 69617 /// XM_0065165	Pitrm1	NM_145131		0.0258394	6.61746	0.144851	0.0724255	6.29502	0.164396	0.0821981	0.0258394	1.25044	1.25044	HIGH n-6/n-3 up vs Low n-6n-3
12720	17285322	NM_010317 // Gng4 // guanine nucleotide binding protein (G protein), gamma 4 // 13 A1|1	Gng4	NM_010317		0.00594159	2.13138	0.12298	0.0614898	1.86606	0.0338094	0.0169047	0.00594159	1.2019	1.2019	HIGH n-6/n-3 up vs Low n-6n-3
12771	17285706	NM_001195421 // Hist1h4m // histone cluster 1, H4m // 13 A3.1|13 // 100041230 /// NM_17	Hist1h4m	NM_001195421		0.034155	6.66811	0.128657	0.0643287	6.22192	0.3004	0.1502	0.034155	1.36243	1.36243	HIGH n-6/n-3 up vs Low n-6n-3
12799	17285799	NM_134238 // Vmn1r219 // vomeronasal 1 receptor 219 // 13 A3.1|13 // 171272 /// ENSMUST	Vmn1r219	NM_134238		0.0483494	2.12858	0.147428	0.0737141	2.72917	0.463082	0.231541	0.0483494	0.659484	-1.51634	HIGH n-6/n-3 down vs Low n-6n-3
12816	17285859	NM_015786 // Hist1h1c // histone cluster 1, H1c // 13|13 A2-A3 // 50708 /// ENSMUST0000	Hist1h1c	NM_015786		0.0259143	6.86598	0.231472	0.115736	6.34151	0.271349	0.135675	0.0259143	1.43841	1.43841	HIGH n-6/n-3 up vs Low n-6n-3
12817	17285863	NM_175664 // Hist1h2bb // histone cluster 1, H2bb // 13 A2-A3|13 // 319178 /// ENSMUST0	Hist1h2bb	NM_175664		0.0355832	4.54527	0.0917583	0.0458792	4.10295	0.314555	0.157278	0.0355832	1.35879	1.35879	HIGH n-6/n-3 up vs Low n-6n-3
12831	17285998	NM_024473 // BC005537 // cDNA sequence BC005537 // 13|13 A3.2 // 79555 /// ENSMUST00000	BC005537	NM_024473		0.0368229	8.94299	0.123506	0.0617531	8.47368	0.328556	0.164278	0.0368229	1.38445	1.38445	HIGH n-6/n-3 up vs Low n-6n-3
12843	17286141	NM_001163218 // Prl3c1 // prolactin family 3, subfamily c, member 1 // 13 A3.1|13 12.32	Prl3c1	NM_001163218		0.0314183	2.06887	0.0838454	0.0419227	2.2161	0.0638659	0.031933	0.0314183	0.90298	-1.10744	HIGH n-6/n-3 down vs Low n-6n-3
12855	17286228	ENSMUST00000118838 // Gm11362 // predicted gene 11362 // --- // ---	Gm11362	ENSMUST00000118838		0.0425191	5.37367	2.56665	1.28332	9.36222	1.75242	0.876208	0.0425191	0.0629978	-15.8736	HIGH n-6/n-3 down vs Low n-6n-3
12863	17286283	NM_001037955 // Dusp22 // dual specificity phosphatase 22 // 13 A3.2|13 // 105352 /// N	Dusp22	NM_001037955		0.0346372	6.50609	0.161651	0.0808254	6.10236	0.24897	0.124485	0.0346372	1.32292	1.32292	HIGH n-6/n-3 up vs Low n-6n-3
12916	17286719	NM_026550 // Pak1ip1 // PAK1 interacting protein 1 // 13 A3.3|13 // 68083 /// ENSMUST00	Pak1ip1	NM_026550		0.0183872	6.70946	0.145268	0.0726338	6.41773	0.109333	0.0546663	0.0183872	1.22411	1.22411	HIGH n-6/n-3 up vs Low n-6n-3
12976	17287260	NM_175401 // Fbxw17 // F-box and WD-40 domain protein 17 // 13 A5|13 // 109082 /// XM_0	Fbxw17	NM_175401		0.00390845	4.16863	0.111022	0.0555112	3.77984	0.130121	0.0650603	0.00390845	1.30929	1.30929	HIGH n-6/n-3 up vs Low n-6n-3
12979	17287288	ENSMUST00000099518 // Gm8765 // predicted gene 8765 // 13 A5|13 // 667693 /// NM_001033	Gm8765	ENSMUST00000099518		0.0321369	3.43733	0.177191	0.0885956	3.77167	0.16308	0.0815401	0.0321369	0.79315	-1.2608	HIGH n-6/n-3 down vs Low n-6n-3
12986	17287330	NM_025415 // Cks2 // CDC28 protein kinase regulatory subunit 2 // 13 A5|13 // 66197 ///	Cks2	NM_025415		0.0306336	4.11369	0.180965	0.0904823	3.61584	0.304195	0.152098	0.0306336	1.4121	1.4121	HIGH n-6/n-3 up vs Low n-6n-3
13012	17287642	NM_025596 // Prelid1 // PRELI domain containing 1 // 13|13 B2 // 66494 /// ENSMUST00000	Prelid1	NM_025596		0.0439246	8.35972	0.0791301	0.0395651	8.04529	0.234328	0.117164	0.0439246	1.24352	1.24352	HIGH n-6/n-3 up vs Low n-6n-3
13021	17287760	ENSMUST00000057844 // B230219D22Rik // RIKEN cDNA B230219D22 gene // 13 B1|13 // 78521	B230219D22Rik	ENSMUST00000057844		0.0100453	7.31247	0.0850543	0.0425271	6.98979	0.152085	0.0760423	0.0100453	1.25065	1.25065	HIGH n-6/n-3 up vs Low n-6n-3
13031	17287827	NM_009369 // Tgfbi // transforming growth factor, beta induced // 13 B-C1|13 30.09 cM /	Tgfbi	NM_009369		0.033055	8.76554	0.206815	0.103408	8.07502	0.456555	0.228278	0.033055	1.61387	1.61387	HIGH n-6/n-3 up vs Low n-6n-3
13087	17288234	NM_001177832 // Gm10324 // predicted gene 10324 // 13 B3|13 // 628709 /// ENSMUST000000	Gm10324	NM_001177832		0.0405585	2.89228	0.07415	0.037075	3.37974	0.367285	0.183643	0.0405585	0.713279	-1.40198	HIGH n-6/n-3 down vs Low n-6n-3
13143	17288714	ENSMUST00000104261 // Gm23127 // predicted gene, 23127 // --- // --- /// AK163470 // El	Gm23127	ENSMUST00000104261		0.023816	6.90673	0.244649	0.122324	7.38948	0.208079	0.10404	0.023816	0.71561	-1.39741	HIGH n-6/n-3 down vs Low n-6n-3																							0	0	0
13163	17288908	NM_007684 // Cetn3 // centrin 3 // 13 C3|13 // 12626 /// ENSMUST00000022009 // Cetn3 //	Cetn3	NM_007684		0.00183779	7.79287	0.0123309	0.00616546	7.44996	0.128922	0.064461	0.00183779	1.26831	1.26831	HIGH n-6/n-3 up vs Low n-6n-3
13165	17288917	NM_001170537 // Mef2c // myocyte enhancer factor 2C // 13 C3|13 43.68 cM // 17260 /// N	Mef2c	NM_001170537		0.047548	6.62489	0.207315	0.103657	6.28004	0.184694	0.092347	0.047548	1.27001	1.27001	HIGH n-6/n-3 up vs Low n-6n-3
13182	17289061	NM_028790 // Acot12 // acyl-CoA thioesterase 12 // 13 C3|13 // 74156 /// ENSMUST0000002	Acot12	NM_028790		0.022479	2.26597	0.0615487	0.0307744	2.44417	0.0992806	0.0496403	0.022479	0.883803	-1.13147	HIGH n-6/n-3 down vs Low n-6n-3																							0	0	0
13191	17289160	ENSMUST00000143025 // Gm15622 // predicted gene 15622 // --- // --- /// AK016283 // Gm1	Gm15622	ENSMUST00000143025		0.0169508	2.05748	0.0368415	0.0184208	2.32574	0.159678	0.0798388	0.0169508	0.830324	-1.20435	HIGH n-6/n-3 down vs Low n-6n-3
13203	17289275	NR_034043 // Snora47 // small nucleolar RNA, H/ACA box 47 // 13|13 // 100217450 /// ENS	Snora47	NR_034043		0.0138708	6.28943	0.303474	0.151737	6.85527	0.128014	0.0640071	0.0138708	0.675563	-1.48025	HIGH n-6/n-3 down vs Low n-6n-3
13204	17289279	ENSMUST00000104192 // Gm22661 // predicted gene, 22661 // --- // ---	Gm22661	ENSMUST00000104192		0.0179652	6.08364	0.150128	0.075064	5.74368	0.147785	0.0738926	0.0179652	1.26573	1.26573	HIGH n-6/n-3 up vs Low n-6n-3
13231	17289497	NM_001168386 // Ccdc125 // coiled-coil domain containing 125 // 13 D1|13 // 76041 /// N	Ccdc125	NM_001168386		0.0434757	4.81787	0.10373	0.0518649	4.47123	0.251282	0.125641	0.0434757	1.2716	1.2716	HIGH n-6/n-3 up vs Low n-6n-3
13239	17289549	ENSMUST00000082521 // n-R5s56 // nuclear encoded rRNA 5S 56 // --- // ---	n-R5s56	ENSMUST00000082521		0.0249793	2.63374	0.435911	0.217955	4.82207	1.40803	0.704015	0.0249793	0.219404	-4.5578	HIGH n-6/n-3 down vs Low n-6n-3
13240	17289551	ENSMUST00000179660 // Gm16416 // predicted gene 16416 // --- // ---	Gm16416	ENSMUST00000179660		0.00680391	7.47852	0.147425	0.0737126	6.62397	0.39654	0.19827	0.00680391	1.80819	1.80819	HIGH n-6/n-3 up vs Low n-6n-3
13302	17290121	XM_006517631 // Paip1 // polyadenylate binding protein-interacting protein 1 // 13 D2.3	Paip1	XM_006517631		0.0420079	6.94146	0.186557	0.0932787	6.51947	0.269371	0.134686	0.0420079	1.33978	1.33978	HIGH n-6/n-3 up vs Low n-6n-3
13360	17290736	ENSMUST00000104614 // n-R5s52 // nuclear encoded rRNA 5S 52 // --- // ---	n-R5s52	ENSMUST00000104614		0.00747848	2.29328	0.125544	0.0627719	2.64519	0.126004	0.0630018	0.00747848	0.783548	-1.27625	HIGH n-6/n-3 down vs Low n-6n-3
13420	17291008	NM_178207 // Hist1h3i // histone cluster 1, H3i // 13 A2-A3|13 // 319153	Hist1h3i	NM_178207		0.0459232	3.27138	0.100275	0.0501376	2.93497	0.24863	0.124315	0.0459232	1.26261	1.26261	HIGH n-6/n-3 up vs Low n-6n-3																							0	0	0
13468	17291208	ENSMUST00000102967 // Hist1h4m // histone cluster 1, H4m // 13 A3.1|13 // 100041230 ///	Hist1h4m	ENSMUST00000102967		0.023591	2.40474	0.168688	0.0843439	2.11086	0.0978866	0.0489433	0.023591	1.22593	1.22593	HIGH n-6/n-3 up vs Low n-6n-3
13482	17291337	NR_024599 // Gm11346 // X-linked lymphocyte-regulated 5 pseudogene // 13 A3.1|13 // 760	Gm11346	NR_024599		0.0069099	2.33145	0.0438976	0.0219488	2.66845	0.161545	0.0807723	0.0069099	0.791686	-1.26313	HIGH n-6/n-3 down vs Low n-6n-3
13486	17291355	NM_025790 // Acot13 // acyl-CoA thioesterase 13 // 13|13 A3.2 // 66834 /// ENSMUST00000	Acot13	NM_025790		0.0191367	7.13989	0.412826	0.206413	6.37111	0.25245	0.126225	0.0191367	1.70384	1.70384	HIGH n-6/n-3 up vs Low n-6n-3
13497	17291442	NM_023332 // Prl8a9 // prolactin family8, subfamily a, member 9 // 13 A3.1|13 // 67310	Prl8a9	NM_023332		0.045967	1.91841	0.136562	0.0682808	2.09407	0.030954	0.015477	0.045967	0.885362	-1.12948	HIGH n-6/n-3 down vs Low n-6n-3
13508	17291559	NM_001289920 // E2f3 // E2F transcription factor 3 // 13|13 A3.3 // 13557 /// NM_010093	E2f3	NM_001289920		0.0150918	3.36737	0.181043	0.0905214	3.02121	0.0974416	0.0487208	0.0150918	1.27118	1.27118	HIGH n-6/n-3 up vs Low n-6n-3																							0	0	0
13510	17291570	NM_025710 // Uqcrfs1 // ubiquinol-cytochrome c reductase, Rieske iron-sulfur polypeptid	Uqcrfs1	NM_025710		0.00562424	6.03979	0.197343	0.0986713	5.56471	0.10953	0.0547652	0.00562424	1.39	1.39	HIGH n-6/n-3 up vs Low n-6n-3
13536	17291787	NM_001033167 // Slc22a23 // solute carrier family 22, member 23 // 13 A3.3|13 // 73102	Slc22a23	NM_001033167		0.0281184	5.11042	0.0777406	0.0388703	4.75385	0.235247	0.117623	0.0281184	1.28038	1.28038	HIGH n-6/n-3 up vs Low n-6n-3
13541	17291833	NM_001110331 // Eci2 // enoyl-Coenzyme A delta isomerase 2 // 13|13 A4 // 23986 /// NM_	Eci2	NM_001110331		0.0225244	6.58374	0.297741	0.148871	6.06896	0.159152	0.0795762	0.0225244	1.42878	1.42878	HIGH n-6/n-3 up vs Low n-6n-3
13554	17291964	NM_025380 // Eef1e1 // eukaryotic translation elongation factor 1 epsilon 1 // 13|13 A5	Eef1e1	NM_025380		0.00542481	7.18911	0.121251	0.0606254	6.6915	0.200818	0.100409	0.00542481	1.41187	1.41187	HIGH n-6/n-3 up vs Low n-6n-3
13638	17292689	NM_028597 // Thoc3 // THO complex 3 // 13|13 B2 // 73666 /// ENSMUST00000026990 // Thoc	Thoc3	NM_028597		0.0370897	6.80547	0.282059	0.141029	6.35077	0.191205	0.0956026	0.0370897	1.37049	1.37049	HIGH n-6/n-3 up vs Low n-6n-3
13679	17293135	NM_027335 // 2210016F16Rik // RIKEN cDNA 2210016F16 gene // 13 B2|13 // 70153 /// ENSMU	2210016F16Rik	NM_027335		0.0384809	6.5362	0.108578	0.054289	6.26379	0.175393	0.0876966	0.0384809	1.20782	1.20782	HIGH n-6/n-3 up vs Low n-6n-3
13745	17293635	NM_008291 // Hsd17b3 // hydroxysteroid (17-beta) dehydrogenase 3 // 13 B3|13 // 15487 /	Hsd17b3	NM_008291		0.0492805	2.29564	0.0933234	0.0466617	2.43068	0.0580374	0.0290187	0.0492805	0.910643	-1.09812	HIGH n-6/n-3 down vs Low n-6n-3
13746	17293650	NM_001001321 // Slc35d2 // solute carrier family 35, member D2 // 13 B3|13 // 70484 ///	Slc35d2	NM_001001321		0.0303683	3.82739	0.138013	0.0690065	3.47428	0.209003	0.104502	0.0303683	1.27731	1.27731	HIGH n-6/n-3 up vs Low n-6n-3
13784	17293982	NM_001076791 // Zfp874b // zinc finger protein 874b // 13 B3|13 // 408067 /// XM_006517	Zfp874b	NM_001076791		0.0133515	2.73456	0.147368	0.073684	2.40566	0.119499	0.0597495	0.0133515	1.25606	1.25606	HIGH n-6/n-3 up vs Low n-6n-3
13830	17294416	NM_146231 // Zfp825 // zinc finger protein 825 // 13 C1|13 // 235956 /// XM_006517242 /	Zfp825	NM_146231		0.0497698	4.4415	0.3011	0.15055	4.05548	0.0928116	0.0464058	0.0497698	1.30678	1.30678	HIGH n-6/n-3 up vs Low n-6n-3
13855	17294723	ENSMUST00000132233 // Cox7c // cytochrome c oxidase subunit VIIc // 13 C3|13 // 12867	Cox7c	ENSMUST00000132233		0.00278526	3.49641	0.157848	0.0789241	3.0021	0.127436	0.0637179	0.00278526	1.40865	1.40865	HIGH n-6/n-3 up vs Low n-6n-3
13858	17294738	NM_001081249 // Vcan // versican // 13 C3|13 45.5 cM // 13003 /// NM_001134474 // Vcan	Vcan	NM_001081249		0.031678	5.70814	0.104444	0.0522222	5.26137	0.303051	0.151525	0.031678	1.36299	1.36299	HIGH n-6/n-3 up vs Low n-6n-3
13876	17294974	NM_133905 // Papd4 // PAP associated domain containing 4 // 13 C3|13 // 100715 /// ENSM	Papd4	NM_133905		0.0292777	6.1165	0.0339292	0.0169646	5.82136	0.204501	0.10225	0.0292777	1.227	1.227	HIGH n-6/n-3 up vs Low n-6n-3
13890	17295130	NM_010169 // F2r // coagulation factor II (thrombin) receptor // 13 D1|13 50.21 cM // 1	F2r	NM_010169		0.0239996	5.94525	0.166032	0.0830162	5.469	0.270593	0.135297	0.0239996	1.39112	1.39112	HIGH n-6/n-3 up vs Low n-6n-3
13899	17295266	ENSMUST00000033486 // Plp2 // proteolipid protein 2 // X A2-A3.1|X 3.45 cM // 18824 ///	Plp2	ENSMUST00000033486		0.0431569	7.8216	0.22297	0.111485	7.16318	0.464505	0.232252	0.0431569	1.57835	1.57835	HIGH n-6/n-3 up vs Low n-6n-3
13949	17295987	NM_029879 // Rgs7bp // regulator of G-protein signalling 7 binding protein // 13 D1|13	Rgs7bp	NM_029879		0.0293929	3.46768	0.240646	0.120323	3.03217	0.189352	0.0946759	0.0293929	1.35239	1.35239	HIGH n-6/n-3 up vs Low n-6n-3
13949	17295987	NM_029879 // Rgs7bp // regulator of G-protein signalling 7 binding protein // 13 D1|13	Rgs7bp	NM_029879		0.0293929	3.46768	0.240646	0.120323	3.03217	0.189352	0.0946759	0.0293929	1.35239	1.35239	HIGH n-6/n-3 up vs Low n-6n-3
13953	17296011	ENSMUST00000082920 // Gm24527 // predicted gene, 24527 // --- // ---	Gm24527	ENSMUST00000082920		0.0447262	3.04598	0.174557	0.0872786	3.41165	0.230525	0.115263	0.0447262	0.776107	-1.28848	HIGH n-6/n-3 down vs Low n-6n-3
13976	17296277	ENSMUST00000099162 // Gm10735 // predicted gene 10735 // 13 D2.2|13 // 100038414 /// AK	Gm10735	ENSMUST00000099162		0.0201867	2.47195	0.168235	0.0841175	2.17535	0.0865611	0.0432805	0.0201867	1.22825	1.22825	HIGH n-6/n-3 up vs Low n-6n-3
13984	17296336	NM_010887 // Ndufs4 // NADH dehydrogenase (ubiquinone) Fe-S protein 4 // 13 D2.2|13 //	Ndufs4	NM_010887		0.0117077	7.84578	0.219674	0.109837	7.36598	0.154191	0.0770956	0.0117077	1.39455	1.39455	HIGH n-6/n-3 up vs Low n-6n-3
13999	17296537	NM_028245 // Zfp131 // zinc finger protein 131 // 13|13 // 72465 /// ENSMUST00000177916	Zfp131	NM_028245		0.014056	5.64617	0.0904564	0.0452282	5.28517	0.190407	0.0952036	0.014056	1.28432	1.28432	HIGH n-6/n-3 up vs Low n-6n-3
14007	17296581	XM_006517832 // Gm3264 // predicted gene 3264 // 14 A1|14 // 100041306 /// XM_006517917	Gm3264	XM_006517832		0.005041	3.41729	0.114202	0.0571009	3.13838	0.060938	0.030469	0.005041	1.21328	1.21328	HIGH n-6/n-3 up vs Low n-6n-3
14027	17296786	XR_383043 // 2610042L04Rik // RIKEN cDNA 2610042L04 gene // 14 A1|14 // 554327 /// ENSM	2610042L04Rik	XR_383043		0.0246159	2.60925	0.136903	0.0684516	2.99429	0.2191	0.10955	0.0246159	0.765761	-1.30589	HIGH n-6/n-3 down vs Low n-6n-3
14096	17297497	NM_025366 // Chchd1 // coiled-coil-helix-coiled-coil-helix domain containing 1 // 14|14	Chchd1	NM_025366		0.0117552	4.57017	0.166303	0.0831515	5.0665	0.222637	0.111319	0.0117552	0.708912	-1.41061	HIGH n-6/n-3 down vs Low n-6n-3
14107	17297639	NM_011695 // Vdac2 // voltage-dependent anion channel 2 // 14 A3|14 11.91 cM // 22334 /	Vdac2	NM_011695		0.0227383	7.11335	0.190263	0.0951313	6.7241	0.17113	0.085565	0.0227383	1.30971	1.30971	HIGH n-6/n-3 up vs Low n-6n-3
14134	17297889	NM_001134465 // Dennd6a // DENN/MADD domain containing 6A // 14 A3|14 // 211922 /// NM_	Dennd6a	NM_001134465		0.0182353	7.06405	0.0782924	0.0391462	6.75881	0.172946	0.0864728	0.0182353	1.23562	1.23562	HIGH n-6/n-3 up vs Low n-6n-3
14150	17298183	NM_009388 // Tkt // transketolase // 14|14 B1 // 21881 /// ENSMUST00000022529 // Tkt //	Tkt	NM_009388		0.0100908	7.27324	0.115976	0.0579882	7.0135	0.0791413	0.0395706	0.0100908	1.19726	1.19726	HIGH n-6/n-3 up vs Low n-6n-3
14154	17298262	NM_181390 // Mustn1 // musculoskeletal, embryonic nuclear protein 1 // 14 B|14 // 66175	Mustn1	NM_181390		0.049144	7.16656	0.491227	0.245614	6.26966	0.539041	0.269521	0.049144	1.86206	1.86206	HIGH n-6/n-3 up vs Low n-6n-3
14231	17299056	ENSMUST00000168619 // Gm7233 // predicted gene 7233 // 14 C1|14 // 638262	Gm7233	ENSMUST00000168619		0.0414503	2.88017	0.347175	0.173587	3.64049	0.474692	0.237346	0.0414503	0.590362	-1.69388	HIGH n-6/n-3 down vs Low n-6n-3																							0	0	0
14253	17299185	NM_027518 // Gpr137c // G protein-coupled receptor 137C // 14 C1|14 // 70713 /// ENSMUS	Gpr137c	NM_027518		0.0139183	2.11902	0.0806951	0.0403475	2.26867	0.0329994	0.0164997	0.0139183	0.901468	-1.1093	HIGH n-6/n-3 down vs Low n-6n-3
14255	17299200	NM_025959 // Psmc6 // proteasome (prosome, macropain) 26S subunit, ATPase, 6 // 14|14 C	Psmc6	NM_025959		0.00273472	8.20214	0.108727	0.0543634	7.67791	0.184727	0.0923633	0.00273472	1.43816	1.43816	HIGH n-6/n-3 up vs Low n-6n-3
14270	17299323	NM_178684 // Mapk1ip1l // mitogen-activated protein kinase 1 interacting protein 1-like	Mapk1ip1l	NM_178684		0.0165925	6.1484	0.145029	0.0725146	5.69984	0.230811	0.115406	0.0165925	1.36467	1.36467	HIGH n-6/n-3 up vs Low n-6n-3
14338	17299792	ENSMUST00000180717 // Trav6d-4 // T cell receptor alpha variable 6D-4 // --- // ---	Trav6d-4	ENSMUST00000180717		0.00642689	2.23407	0.0801154	0.0400577	2.49818	0.101284	0.0506422	0.00642689	0.832711	-1.2009	HIGH n-6/n-3 down vs Low n-6n-3
14404	17299995	ENSMUST00000103643 // Trav8-1 // T cell receptor alpha variable 8-1 // --- // ---	Trav8-1	ENSMUST00000103643		0.0166107	2.2519	0.0422988	0.0211494	2.52729	0.161972	0.0809859	0.0166107	0.826226	-1.21032	HIGH n-6/n-3 down vs Low n-6n-3
14412	17300021	ENSMUST00000103652 // Trav14-1 // T cell receptor alpha variable 14-1 // --- // --- ///	Trav14-1	ENSMUST00000103652		0.0196488	2.97451	0.148493	0.0742465	2.6292	0.160677	0.0803387	0.0196488	1.27043	1.27043	HIGH n-6/n-3 up vs Low n-6n-3
14422	17300054	ENSMUST00000103662 // Trav9d-4 // T cell receptor alpha variable 9D-4 // 14 C2|14 // 66	Trav9d-4	ENSMUST00000103662		0.0135057	2.62906	0.138578	0.0692892	2.31867	0.114143	0.0570717	0.0135057	1.24004	1.24004	HIGH n-6/n-3 up vs Low n-6n-3
14444	17300131	ENSMUST00000165025 // Traj61 // T cell receptor alpha joining 61 // --- // ---	Traj61	ENSMUST00000165025		0.00600619	2.54903	0.133432	0.066716	2.92748	0.124295	0.0621476	0.00600619	0.769262	-1.29995	HIGH n-6/n-3 down vs Low n-6n-3
14480	17300203	ENSMUST00000103717 // Traj24 // T cell receptor alpha joining 24 // --- // ---	Traj24	ENSMUST00000103717		0.0342317	2.58645	0.411044	0.205522	3.83801	0.819969	0.409984	0.0342317	0.419996	-2.38098	HIGH n-6/n-3 down vs Low n-6n-3
14494	17300231	ENSMUST00000103732 // Traj8 // T cell receptor alpha joining 8 // --- // ---	Traj8	ENSMUST00000103732		0.0395272	2.19278	0.171637	0.0858185	2.48807	0.145975	0.0729874	0.0395272	0.814908	-1.22713	HIGH n-6/n-3 down vs Low n-6n-3
14503	17300261	NM_026936 // Oxa1l // oxidase assembly 1-like // 14 C2|14 // 69089 /// ENSMUST000000009	Oxa1l	NM_026936		0.0145852	8.55085	0.21336	0.10668	8.05278	0.201417	0.100708	0.0145852	1.41232	1.41232	HIGH n-6/n-3 up vs Low n-6n-3
14511	17300292	NM_022993 // Lrp10 // low-density lipoprotein receptor-related protein 10 // 14 C2-C3|1	Lrp10	NM_022993		0.0437595	6.53176	0.109794	0.0548968	6.306	0.139325	0.0696625	0.0437595	1.1694	1.1694	HIGH n-6/n-3 up vs Low n-6n-3
14551	17300591	NM_001159417 // Irf9 // interferon regulatory factor 9 // 14 C3|14 28.19 cM // 16391 //	Irf9	NM_001159417		0.0189903	5.27535	0.287163	0.143581	4.72156	0.196413	0.0982063	0.0189903	1.46794	1.46794	HIGH n-6/n-3 up vs Low n-6n-3
14554	17300638	NM_177992 // Gmpr2 // guanosine monophosphate reductase 2 // 14 C3|14 // 105446 /// XM_	Gmpr2	NM_177992		0.0410147	6.08638	0.291267	0.145634	5.69317	0.08428	0.04214	0.0410147	1.31331	1.31331	HIGH n-6/n-3 up vs Low n-6n-3
14559	17300686	NM_001040072 // Nynrin // NYN domain and retroviral integrase containing // 14 C3|14 //	Nynrin	NM_001040072		0.0328967	4.00262	0.319302	0.159651	3.38568	0.313133	0.156567	0.0328967	1.53362	1.53362	HIGH n-6/n-3 up vs Low n-6n-3
14583	17300984	NM_026908 // Cab39l // calcium binding protein 39-like // 14 C3-D1|14 // 69008 /// XM_0	Cab39l	NM_026908		0.000487152	7.06552	0.151933	0.0759667	6.53304	0.0359396	0.0179698	0.000487152	1.44642	1.44642	HIGH n-6/n-3 up vs Low n-6n-3
14603	17301176	NM_175546 // Wdfy2 // WD repeat and FYVE domain containing 2 // 14 D1|14 // 268752 ///	Wdfy2	NM_175546		0.0178577	5.49545	0.273032	0.136516	4.93826	0.210509	0.105254	0.0178577	1.47141	1.47141	HIGH n-6/n-3 up vs Low n-6n-3
14691	17302061	NM_013745 // Nufip1 // nuclear fragile X mental retardation protein interacting protein	Nufip1	NM_013745		0.0417233	4.6471	0.190703	0.0953516	4.18713	0.30115	0.150575	0.0417233	1.37551	1.37551	HIGH n-6/n-3 up vs Low n-6n-3
14700	17302156	ENSMUST00000174283 // Gm19301 // predicted gene, 19301 // --- // ---	Gm19301	ENSMUST00000174283		0.0081978	2.01449	0.0462653	0.0231326	2.28436	0.131303	0.0656514	0.0081978	0.829389	-1.20571	HIGH n-6/n-3 down vs Low n-6n-3
14719	17302327	ENSMUST00000157780 // Gm25886 // predicted gene, 25886 // --- // ---	Gm25886	ENSMUST00000157780		0.046675	2.18587	0.0802559	0.040128	2.44945	0.195207	0.0976037	0.046675	0.833018	-1.20045	HIGH n-6/n-3 down vs Low n-6n-3
14735	17302412	ENSMUST00000104165 // Gm26367 // predicted gene, 26367 // --- // ---	Gm26367	ENSMUST00000104165		0.0195203	2.34158	0.198582	0.099291	2.69126	0.097426	0.048713	0.0195203	0.784755	-1.27428	HIGH n-6/n-3 down vs Low n-6n-3
14792	17302773	NM_023579 // Ipo5 // importin 5 // 14 E5|14 // 70572 /// ENSMUST00000032898 // Ipo5 //	Ipo5	NM_023579		0.0157553	6.94214	0.134426	0.067213	6.54659	0.195654	0.0978269	0.0157553	1.31545	1.31545	HIGH n-6/n-3 up vs Low n-6n-3
14849	17303333	ENSMUST00000164372 // Gm2244 // predicted gene 2244 // 14 A3|14 // 100039452 /// ENSMUS	Gm2244	ENSMUST00000164372		0.00860252	2.62469	0.144457	0.0722283	2.3363	0.0417634	0.0208817	0.00860252	1.22127	1.22127	HIGH n-6/n-3 up vs Low n-6n-3
14871	17303568	AK013319 // Thoc7 // THO complex 7 homolog (Drosophila) // 14|14 A2 // 66231 /// NM_001	Thoc7	AK013319		0.034831	7.19934	0.0778469	0.0389235	6.84179	0.251526	0.125763	0.034831	1.28125	1.28125	HIGH n-6/n-3 up vs Low n-6n-3
14880	17303646	BC003781 // Ube2e1 // ubiquitin-conjugating enzyme E2E 1 // 14|14 A3 // 22194 /// NM_00	Ube2e1	BC003781		0.0384301	6.30934	0.0645427	0.0322714	5.945	0.26813	0.134065	0.0384301	1.28729	1.28729	HIGH n-6/n-3 up vs Low n-6n-3
14897	17303804	NM_001110794 // Anxa7 // annexin A7 // 14 A3|14 11.53 cM // 11750 /// NM_009674 // Anxa	Anxa7	NM_001110794		0.035657	6.51566	0.131616	0.0658079	6.08004	0.294837	0.147419	0.035657	1.35249	1.35249	HIGH n-6/n-3 up vs Low n-6n-3
14935	17304235	ENSMUST00000166902 // 4930570N19Rik // RIKEN cDNA 4930570N19 gene // --- // --- /// AK0	4930570N19Rik	ENSMUST00000166902		0.00366404	2.15972	0.112451	0.0562257	2.49561	0.0928187	0.0464094	0.00366404	0.792294	-1.26216	HIGH n-6/n-3 down vs Low n-6n-3
14968	17304850	NM_172254 // Dph3 // diphthamine biosynthesis 3 // 14 B|14 // 105638 /// NR_104303 // D	Dph3	NM_172254		0.0245758	3.59679	0.16307	0.0815349	3.32437	0.0824175	0.0412087	0.0245758	1.20783	1.20783	HIGH n-6/n-3 up vs Low n-6n-3
15053	17305561	ENSMUST00000165769 // Gm5624 // predicted gene 5624 // --- // ---	Gm5624	ENSMUST00000165769		0.0293294	5.14672	0.135662	0.0678308	6.18229	0.714946	0.357473	0.0293294	0.487821	-2.04993	HIGH n-6/n-3 down vs Low n-6n-3
15064	17305683	ENSMUST00000158144 // Gm22637 // predicted gene, 22637 // --- // ---	Gm22637	ENSMUST00000158144		0.0321153	3.14658	0.22293	0.111465	2.71373	0.217873	0.108936	0.0321153	1.3499	1.3499	HIGH n-6/n-3 up vs Low n-6n-3
15069	17305719	NM_009919 // Cnih1 // cornichon homolog 1 (Drosophila) // 14 C1|14 // 12793 /// ENSMUST	Cnih1	NM_009919		0.0494219	8.01218	0.287972	0.143986	7.43185	0.374826	0.187413	0.0494219	1.49518	1.49518	HIGH n-6/n-3 up vs Low n-6n-3
15210	17306937	NM_010780 // Cma1 // chymase 1, mast cell // 14 C3|14 28.19 cM // 17228 /// ENSMUST0000	Cma1	NM_010780		0.0493784	5.22743	0.616449	0.308225	4.39028	0.291005	0.145502	0.0493784	1.78652	1.78652	HIGH n-6/n-3 up vs Low n-6n-3
15217	17306983	NM_010373 // Gzme // granzyme E // 14 C3|14 28.19 cM // 14942 /// ENSMUST00000089549 //	Gzme	NM_010373		0.0424373	2.56771	0.137651	0.0688256	3.08616	0.379552	0.189776	0.0424373	0.698123	-1.43241	HIGH n-6/n-3 down vs Low n-6n-3
15252	17307290	NM_199015 // Phf11d // PHD finger protein 11D // 14 C3|14 31.48 cM // 219132 /// XM_006	Phf11d	NM_199015		0.0392783	3.0978	0.266706	0.133353	2.73032	0.0849158	0.0424579	0.0392783	1.2901	1.2901	HIGH n-6/n-3 up vs Low n-6n-3
15268	17307493	NM_025697 // Spryd7 // SPRY domain containing 7 // 14 D1|14 // 66674 /// XM_006519394 /	Spryd7	NM_025697		0.015188	5.84398	0.205634	0.102817	5.34937	0.210426	0.105213	0.015188	1.40894	1.40894	HIGH n-6/n-3 up vs Low n-6n-3
15280	17307588	NM_010191 // Fdft1 // farnesyl diphosphate farnesyl transferase 1 // 14 D1|14 33.24 cM	Fdft1	NM_010191		0.00812616	6.62865	0.122473	0.0612367	6.32416	0.0978483	0.0489241	0.00812616	1.23498	1.23498	HIGH n-6/n-3 up vs Low n-6n-3
15384	17308622	ENSMUST00000181108 // Cbx3 // chromobox 3 // 6 B-C|6 24.89 cM // 12417	Cbx3	ENSMUST00000181108		0.00634254	7.90043	0.131385	0.0656927	7.37394	0.22052	0.11026	0.00634254	1.44042	1.44042	HIGH n-6/n-3 up vs Low n-6n-3																							0	0	0
15387	17308669	XR_383590 // Gm15628 // predicted gene 15628 // 14 D3|14 // 100043176 /// ENSMUST000001	Gm15628	XR_383590		0.0494839	2.46415	0.124012	0.0620061	2.74075	0.18819	0.094095	0.0494839	0.825535	-1.21134	HIGH n-6/n-3 down vs Low n-6n-3
15392	17308712	ENSMUST00000158780 // Gm24876 // predicted gene, 24876 // --- // ---	Gm24876	ENSMUST00000158780		0.0345998	2.33236	0.125384	0.0626922	2.70048	0.239778	0.119889	0.0345998	0.774792	-1.29067	HIGH n-6/n-3 down vs Low n-6n-3
15396	17308734	NM_026816 // Gtf2f2 // general transcription factor IIF, polypeptide 2 // 14 D3|14 // 6	Gtf2f2	NM_026816		0.0407502	5.6871	0.241312	0.120656	5.31685	0.151612	0.075806	0.0407502	1.29258	1.29258	HIGH n-6/n-3 up vs Low n-6n-3																							0	0	0
15428	17309001	NM_178685 // Pcdh20 // protocadherin 20 // 14 E1|14 // 219257 /// ENSMUST00000061628 //	Pcdh20	NM_178685		0.0142799	3.45201	0.156784	0.0783919	3.04305	0.181318	0.0906591	0.0142799	1.32773	1.32773	HIGH n-6/n-3 up vs Low n-6n-3
15429	17309006	ENSMUST00000081204 // Gm10110 // predicted gene 10110 // --- // --- /// BC003283 // Pab	Gm10110	ENSMUST00000081204		0.0148174	6.11432	0.318058	0.159029	5.40225	0.275934	0.137967	0.0148174	1.63816	1.63816	HIGH n-6/n-3 up vs Low n-6n-3
15465	17309302	ENSMUST00000104531 // Gm25724 // predicted gene, 25724 // --- // ---	Gm25724	ENSMUST00000104531		0.000386943	2.62808	0.0454724	0.0227362	2.34147	0.0664771	0.0332385	0.000386943	1.21978	1.21978	HIGH n-6/n-3 up vs Low n-6n-3
15468	17309338	ENSMUST00000082781 // Gm24207 // predicted gene, 24207 // --- // ---	Gm24207	ENSMUST00000082781		0.0326669	2.74859	0.220264	0.110132	2.31195	0.226459	0.113229	0.0326669	1.35345	1.35345	HIGH n-6/n-3 up vs Low n-6n-3
15514	17309825	NM_177355 // Plcxd3 // phosphatidylinositol-specific phospholipase C, X domain containi	Plcxd3	NM_177355		0.0413355	1.99141	0.0522882	0.0261441	2.07399	0.0366049	0.0183025	0.0413355	0.944364	-1.05891	HIGH n-6/n-3 down vs Low n-6n-3
15576	17310673	NM_020332 // Ank // progressive ankylosis // 15 B1|15 10.23 cM // 11732 /// ENSMUST0000	Ank	NM_020332		0.00436597	5.70741	0.100454	0.0502269	5.37771	0.109294	0.0546471	0.00436597	1.25676	1.25676	HIGH n-6/n-3 up vs Low n-6n-3
15641	17311437	NR_040309 // 2310069G16Rik // RIKEN cDNA 2310069G16 gene // 15|15 // 69659 /// ENSMUST0	2310069G16Rik	NR_040309		0.0382441	2.12351	0.154552	0.0772762	2.45	0.192416	0.096208	0.0382441	0.797475	-1.25396	HIGH n-6/n-3 down vs Low n-6n-3
15714	17312089	NM_053068 // Chrac1 // chromatin accessibility complex 1 // 15|15 E1 // 93696 /// ENSMU	Chrac1	NM_053068		0.0264367	5.79432	0.200092	0.100046	5.40071	0.179898	0.0899488	0.0264367	1.31367	1.31367	HIGH n-6/n-3 up vs Low n-6n-3																							0	0	0
15738	17312293	NM_178646 // Tigd5 // tigger transposable element derived 5 // 15 D3|15 // 105734 /// E	Tigd5	NM_178646		0.0499797	2.78105	0.150394	0.075197	2.47571	0.199127	0.0995636	0.0499797	1.23571	1.23571	HIGH n-6/n-3 up vs Low n-6n-3
15746	17312358	NM_001195537 // Smpd5 // sphingomyelin phosphodiesterase 5 // 15 D3|15 // 100503915 ///	Smpd5	NM_001195537		0.0174095	2.88781	0.131997	0.0659985	2.58187	0.134034	0.0670172	0.0174095	1.23622	1.23622	HIGH n-6/n-3 up vs Low n-6n-3
15755	17312485	NM_008296 // Hsf1 // heat shock factor 1 // 15 D3|15 35.95 cM // 15499 /// XM_006520476	Hsf1	NM_008296		0.0482813	4.76078	0.140072	0.0700361	4.47287	0.186036	0.093018	0.0482813	1.22087	1.22087	HIGH n-6/n-3 up vs Low n-6n-3
15809	17313016	NM_172609 // Tomm22 // translocase of outer mitochondrial membrane 22 homolog (yeast) /	Tomm22	NM_172609		0.0364969	6.08249	0.262514	0.131257	5.61007	0.235172	0.117586	0.0364969	1.38744	1.38744	HIGH n-6/n-3 up vs Low n-6n-3
15817	17313075	NM_025609 // Tab1 // TGF-beta activated kinase 1/MAP3K7 binding protein 1 // 15|15 E2 /	Tab1	NM_025609		0.00528596	4.80046	0.189783	0.0948915	4.35448	0.0877476	0.0438738	0.00528596	1.36225	1.36225	HIGH n-6/n-3 up vs Low n-6n-3
15851	17313568	NM_026914 // Smdt1 // single-pass membrane protein with aspartate rich tail 1 // 15|15	Smdt1	NM_026914		0.037856	5.26265	0.216361	0.108181	4.94775	0.0975981	0.0487991	0.037856	1.24393	1.24393	HIGH n-6/n-3 up vs Low n-6n-3
15885	17313877	NM_001033337 // Ttc38 // tetratricopeptide repeat domain 38 // 15 E2|15 // 239570 /// X	Ttc38	NM_001033337		0.0383748	5.06372	0.152075	0.0760373	4.79606	0.133758	0.066879	0.0383748	1.20386	1.20386	HIGH n-6/n-3 up vs Low n-6n-3
15886	17313895	NM_001168672 // Gtse1 // G two S phase expressed protein 1 // 15 E2|15 40.42 cM // 2987	Gtse1	NM_001168672		0.0142173	2.83376	0.255968	0.127984	2.30658	0.172513	0.0862563	0.0142173	1.44111	1.44111	HIGH n-6/n-3 up vs Low n-6n-3
15900	17314049	ENSMUST00000082547 // Gm23737 // predicted gene, 23737 // --- // ---	Gm23737	ENSMUST00000082547		0.0087971	3.52322	0.398984	0.199492	4.34331	0.159718	0.079859	0.0087971	0.566407	-1.76551	HIGH n-6/n-3 down vs Low n-6n-3																							0	0	0
15963	17314738	NM_139140 // Spats2 // spermatogenesis associated, serine-rich 2 // 15 F1|15 // 72572 /	Spats2	NM_139140		0.0350073	4.42083	0.141174	0.070587	3.97263	0.298848	0.149424	0.0350073	1.36433	1.36433	HIGH n-6/n-3 up vs Low n-6n-3
15974	17314888	NM_010271 // Gpd1 // glycerol-3-phosphate dehydrogenase 1 (soluble) // 15 F1-F3|15 56.1	Gpd1	NM_010271		0.00415529	9.42009	0.208634	0.104317	8.86813	0.130251	0.0651253	0.00415529	1.46608	1.46608	HIGH n-6/n-3 up vs Low n-6n-3																							0	0	0
16073	17315878	NM_001285980 // Skp2 // S-phase kinase-associated protein 2 (p45) // 15 A2|15 // 27401	Skp2	NM_001285980		0.0202527	3.78519	0.104144	0.052072	3.38862	0.230766	0.115383	0.0202527	1.31638	1.31638	HIGH n-6/n-3 up vs Low n-6n-3
16115	17316328	NM_007637 // Cct5 // chaperonin containing Tcp1, subunit 5 (epsilon) // 15|15 B3.2 // 1	Cct5	NM_007637		0.027214	7.52517	0.115602	0.0578011	7.2055	0.187415	0.0937075	0.027214	1.24804	1.24804	HIGH n-6/n-3 up vs Low n-6n-3																							0	0	0
16143	17316564	NM_026521 // Zfp706 // zinc finger protein 706 // 15 B3.1|15 // 68036 /// ENSMUST000000	Zfp706	NM_026521		0.0199518	7.17189	0.22104	0.11052	6.74408	0.158668	0.0793342	0.0199518	1.34519	1.34519	HIGH n-6/n-3 up vs Low n-6n-3
16190	17317046	NM_008764 // Tnfrsf11b // tumor necrosis factor receptor superfamily, member 11b (osteo	Tnfrsf11b	NM_008764		0.0173084	3.06649	0.0716885	0.0358443	2.7862	0.156458	0.0782292	0.0173084	1.21444	1.21444	HIGH n-6/n-3 up vs Low n-6n-3
16286	17318013	NM_011838 // Lynx1 // Ly6/neurotoxin 1 // 15 D3|15 // 23936 /// ENSMUST00000023259 // L	Lynx1	NM_011838		0.00954114	5.68877	0.389616	0.194808	4.90715	0.149117	0.0745585	0.00954114	1.71906	1.71906	HIGH n-6/n-3 up vs Low n-6n-3
16326	17318461	NM_025340 // Sharpin // SHANK-associated RH domain interacting protein // 15 D3|15 35.7	Sharpin	NM_025340		0.0273054	5.06519	0.313213	0.156606	4.45647	0.279347	0.139673	0.0273054	1.5249	1.5249	HIGH n-6/n-3 up vs Low n-6n-3
16335	17318603	NM_025842 // Vps28 // vacuolar protein sorting 28 (yeast) // 15 D3|15 // 66914 /// ENSM	Vps28	NM_025842		0.0311348	8.01381	0.128165	0.0640823	7.72952	0.157447	0.0787236	0.0311348	1.21782	1.21782	HIGH n-6/n-3 up vs Low n-6n-3
16337	17318650	NM_001276321 // Cyhr1 // cysteine and histidine rich 1 // 15|15 E1 // 54151 /// NM_0012	Cyhr1	NM_001276321		0.0353844	5.5128	0.235084	0.117542	5.16567	0.103227	0.0516137	0.0353844	1.27203	1.27203	HIGH n-6/n-3 up vs Low n-6n-3
16347	17318770	ENSMUST00000158617 // Gm24056 // predicted gene, 24056 // --- // ---	Gm24056	ENSMUST00000158617		0.0338183	3.37091	0.297034	0.148517	3.88263	0.226875	0.113437	0.0338183	0.701388	-1.42574	HIGH n-6/n-3 down vs Low n-6n-3
16360	17318907	NM_018749 // Eif3d // eukaryotic translation initiation factor 3, subunit D // 15 E1|15	Eif3d	NM_018749		0.00612887	7.43407	0.0504034	0.0252017	7.13822	0.134014	0.067007	0.00612887	1.22761	1.22761	HIGH n-6/n-3 up vs Low n-6n-3
16388	17319168	NM_001199024 // Pla2g6 // phospholipase A2, group VI // 15 E1|15 // 53357 /// NM_001199	Pla2g6	NM_001199024		0.0444089	4.10251	0.110366	0.0551832	3.84405	0.171518	0.085759	0.0444089	1.19621	1.19621	HIGH n-6/n-3 up vs Low n-6n-3
16391	17319207	NM_001289898 // Csnk1e // casein kinase 1, epsilon // 15|15 E1 // 27373 /// NM_00128989	Csnk1e	NM_001289898		0.0401467	4.70512	0.0753452	0.0376726	4.35594	0.256798	0.128399	0.0401467	1.27384	1.27384	HIGH n-6/n-3 up vs Low n-6n-3
16414	17319453	NM_011399 // Slc25a17 // solute carrier family 25 (mitochondrial carrier, peroxisomal m	Slc25a17	NM_011399		0.0114977	7.17323	0.139911	0.0699553	6.82522	0.134182	0.0670912	0.0114977	1.27281	1.27281	HIGH n-6/n-3 up vs Low n-6n-3
16474	17320079	NM_001163633 // Wnt7b // wingless-type MMTV integration site family, member 7B // 15 E2	Wnt7b	NM_001163633		0.044971	1.87466	0.057008	0.028504	1.97289	0.0529336	0.0264668	0.044971	0.934184	-1.07045	HIGH n-6/n-3 down vs Low n-6n-3
16494	17320457	NM_178919 // Lmf2 // lipase maturation factor 2 // 15 E3|15 // 105847 /// ENSMUST000000	Lmf2	NM_178919		0.03165	6.09581	0.0629231	0.0314616	5.58963	0.357585	0.178792	0.03165	1.42028	1.42028	HIGH n-6/n-3 up vs Low n-6n-3
16515	17320705	NM_024189 // Yaf2 // YY1 associated factor 2 // 15|15 F1 // 67057 /// NR_028315 // Yaf2	Yaf2	NM_024189		0.0485413	5.19345	0.244151	0.122076	4.88588	0.0497577	0.0248788	0.0485413	1.23762	1.23762	HIGH n-6/n-3 up vs Low n-6n-3
16572	17321440	NM_029098 // Lmbr1l // limb region 1 like // 15 F1|15 55.1 cM // 74775 /// ENSMUST00000	Lmbr1l	NM_029098		0.0220192	4.31861	0.142654	0.0713272	3.87193	0.253934	0.126967	0.0220192	1.36291	1.36291	HIGH n-6/n-3 up vs Low n-6n-3																							0	0	0
16582	17321524	NM_011711 // Fmnl3 // formin-like 3 // 15|15 F3 // 22379 /// ENSMUST00000081224 // Fmnl	Fmnl3	NM_011711		0.0132397	5.89194	0.104101	0.0520503	5.54291	0.171876	0.0859378	0.0132397	1.27371	1.27371	HIGH n-6/n-3 up vs Low n-6n-3
16587	17321597	NM_001253808 // Racgap1 // Rac GTPase-activating protein 1 // 15 F1|15 // 26934 /// NM_	Racgap1	NM_001253808		0.0371958	5.10628	0.223025	0.111512	4.50133	0.395125	0.197562	0.0371958	1.52092	1.52092	HIGH n-6/n-3 up vs Low n-6n-3
16592	17321630	NM_028015 // Cers5 // ceramide synthase 5 // 15 F1|15 // 71949 /// ENSMUST00000023762 /	Cers5	NM_028015		0.0384405	5.57976	0.0381925	0.0190963	5.12014	0.34584	0.17292	0.0384405	1.37518	1.37518	HIGH n-6/n-3 up vs Low n-6n-3
16605	17321761	NM_001033872 // Smagp // small cell adhesion glycoprotein // 15 F1|15 // 207818 /// NM_	Smagp	NM_001033872		0.0308357	4.86624	0.32205	0.161025	4.30522	0.236546	0.118273	0.0308357	1.47532	1.47532	HIGH n-6/n-3 up vs Low n-6n-3
16658	17322320	NM_027885 // Smug1 // single-strand selective monofunctional uracil DNA glycosylase //	Smug1	NM_027885		0.00993293	3.32753	0.153661	0.0768305	3.00623	0.0796218	0.0398109	0.00993293	1.24946	1.24946	HIGH n-6/n-3 up vs Low n-6n-3
16663	17322359	NM_013866 // Zfp385a // zinc finger protein 385A // 15 F3|15 // 29813 /// XM_006521055	Zfp385a	NM_013866		0.0461323	4.4056	0.247283	0.123641	3.86232	0.356081	0.17804	0.0461323	1.45728	1.45728	HIGH n-6/n-3 up vs Low n-6n-3
16664	17322369	NM_010577 // Itga5 // integrin alpha 5 (fibronectin receptor alpha) // 15 F3|15 58.9 cM	Itga5	NM_010577		0.0257749	4.68918	0.151506	0.0757532	4.27336	0.23829	0.119145	0.0257749	1.33406	1.33406	HIGH n-6/n-3 up vs Low n-6n-3
16668	17322429	NM_021391 // Ppp1r1a // protein phosphatase 1, regulatory (inhibitor) subunit 1A // 15|	Ppp1r1a	NM_021391		0.0488526	6.28979	0.46797	0.233985	5.67842	0.165101	0.0825507	0.0488526	1.52771	1.52771	HIGH n-6/n-3 up vs Low n-6n-3
16677	17322476	ENSMUST00000143537 // Naa60 // N(alpha)-acetyltransferase 60, NatF catalytic subunit //	Naa60	ENSMUST00000143537		0.0197257	5.91816	0.033953	0.0169765	5.63682	0.175167	0.0875837	0.0197257	1.21532	1.21532	HIGH n-6/n-3 up vs Low n-6n-3
16715	17322735	NM_146247 // Mettl22 // methyltransferase like 22 // 16 A1|16 // 239706 /// ENSMUST0000	Mettl22	NM_146247		0.00751058	4.06668	0.192138	0.0960692	3.63007	0.108975	0.0544875	0.00751058	1.35342	1.35342	HIGH n-6/n-3 up vs Low n-6n-3																							0	0	0
16775	17323192	NM_011415 // Snai2 // snail family zinc finger 2 // 16 A1|16 10.07 cM // 20583 /// ENSM	Snai2	NM_011415		0.0082373	4.86598	0.0796343	0.0398172	4.38945	0.232837	0.116418	0.0082373	1.39139	1.39139	HIGH n-6/n-3 up vs Low n-6n-3
16801	17323548	NM_001164609 // Smpd4 // sphingomyelin phosphodiesterase 4 // 16|16 B1 // 77626 /// NM_	Smpd4	NM_001164609		0.00579936	4.20279	0.122873	0.0614363	3.65357	0.232136	0.116068	0.00579936	1.4633	1.4633	HIGH n-6/n-3 up vs Low n-6n-3
16813	17323659	NM_001080999 // Trmt2a // TRM2 tRNA methyltransferase 2A // 16 A3|16 11.31 cM // 15547	Trmt2a	NM_001080999		0.0283391	4.78186	0.306204	0.153102	4.31075	0.117665	0.0588326	0.0283391	1.38618	1.38618	HIGH n-6/n-3 up vs Low n-6n-3
16834	17323909	NM_007889 // Dvl3 // dishevelled 3, dsh homolog (Drosophila) // 16 A3|16 12.46 cM // 13	Dvl3	NM_007889		0.00673175	5.33923	0.112709	0.0563547	4.98209	0.135696	0.0678479	0.00673175	1.28089	1.28089	HIGH n-6/n-3 up vs Low n-6n-3
16845	17324135	ENSMUST00000115423 // Chrd // chordin // 16 B1|16 12.51 cM // 12667 /// AF069501 // Chr	Chrd	ENSMUST00000115423		0.0234065	2.78735	0.194717	0.0973585	2.45823	0.0979926	0.0489963	0.0234065	1.25625	1.25625	HIGH n-6/n-3 up vs Low n-6n-3
16853	17324297	XR_384742 // 9230117E06Rik // RIKEN cDNA 9230117E06 gene // 16|16 // 78082 /// XR_38474	9230117E06Rik	XR_384742		0.0104146	2.12354	0.104365	0.0521826	2.40812	0.114534	0.0572672	0.0104146	0.820978	-1.21806	HIGH n-6/n-3 down vs Low n-6n-3
16855	17324303	ENSMUST00000122562 // Gm22481 // predicted gene, 22481 // --- // ---	Gm22481	ENSMUST00000122562		0.041966	2.25048	0.377603	0.188802	3.64092	1.01112	0.50556	0.041966	0.381446	-2.6216	HIGH n-6/n-3 down vs Low n-6n-3
16885	17324522	NM_001159318 // Il1rap // interleukin 1 receptor accessory protein // 16|16 B2 // 16180	Il1rap	NM_001159318		0.0245219	2.97964	0.176341	0.0881703	2.6488	0.134478	0.0672391	0.0245219	1.25774	1.25774	HIGH n-6/n-3 up vs Low n-6n-3
16933	17324751	NM_026898 // Wdr53 // WD repeat domain 53 // 16 B2|16 // 68980 /// ENSMUST00000023474 /	Wdr53	NM_026898		0.0380489	4.36321	0.215054	0.107527	4.01126	0.15597	0.0779851	0.0380489	1.27628	1.27628	HIGH n-6/n-3 up vs Low n-6n-3
16946	17324932	NM_001081255 // Lrch3 // leucine-rich repeats and calponin homology (CH) domain contain	Lrch3	NM_001081255		0.0325207	6.8409	0.122303	0.0611514	6.48405	0.227014	0.113507	0.0325207	1.28062	1.28062	HIGH n-6/n-3 up vs Low n-6n-3
16953	17325014	NM_080557 // Snx4 // sorting nexin 4 // 16 B3|16 // 69150 /// ENSMUST00000023502 // Snx	Snx4	NM_080557		0.0176015	7.87769	0.0967789	0.0483894	7.48839	0.219648	0.109824	0.0176015	1.30976	1.30976	HIGH n-6/n-3 up vs Low n-6n-3
16974	17325324	NM_173869 // Stfa2l1 // stefin A2 like 1 // 16 B3|16 // 268885 /// ENSMUST00000079184 /	Stfa2l1	NM_173869		0.0389558	3.58169	0.740358	0.370179	2.59381	0.124017	0.0620086	0.0389558	1.98327	1.98327	HIGH n-6/n-3 up vs Low n-6n-3
17016	17325721	ENSMUST00000180317 // Gm25873 // predicted gene, 25873 // --- // ---	Gm25873	ENSMUST00000180317		0.0382068	6.57158	0.310919	0.15546	7.1432	0.299899	0.14995	0.0382068	0.672859	-1.4862	HIGH n-6/n-3 down vs Low n-6n-3
17050	17326081	NM_172616 // C330027C09Rik // RIKEN cDNA C330027C09 gene // 16 B5|16 // 224171 /// ENSM	C330027C09Rik	NM_172616		0.00294657	3.87032	0.209605	0.104803	3.35967	0.0316441	0.015822	0.00294657	1.42469	1.42469	HIGH n-6/n-3 up vs Low n-6n-3
17079	17326428	NM_007757 // Cpox // coproporphyrinogen oxidase // 16 C1.1|16 // 12892 /// ENSMUST00000	Cpox	NM_007757		0.000782466	4.52354	0.0787208	0.0393604	4.8732	0.0796955	0.0398477	0.000782466	0.784769	-1.27426	HIGH n-6/n-3 down vs Low n-6n-3
17117	17326702	NR_029728 // Mirlet7c-1 // microRNA let7c-1 // 16|16 // 387246 /// ENSMUST00000083623 /	Mirlet7c-1	NR_029728		0.0130478	1.97694	0.160371	0.0801855	2.26394	0.0373416	0.0186708	0.0130478	0.819605	-1.2201	HIGH n-6/n-3 down vs Low n-6n-3
17152	17326919	XR_385027 // Gm5965 // predicted gene 5965 // 16 C3.3|16 // 546672 /// ENSMUST000000091	Gm5965	XR_385027		0.0307666	2.40429	0.130524	0.0652622	2.11434	0.159877	0.0799386	0.0307666	1.2226	1.2226	HIGH n-6/n-3 up vs Low n-6n-3
17185	17327137	NM_001110275 // Itsn1 // intersectin 1 (SH3 domain protein 1A) // 16 C3.3-C4|16 // 1644	Itsn1	NM_001110275		0.00921892	4.4963	0.0355311	0.0177656	4.2226	0.140525	0.0702625	0.00921892	1.2089	1.2089	HIGH n-6/n-3 up vs Low n-6n-3
17211	17327465	NM_011809 // Ets2 // E26 avian leukemia oncogene 2, 3 domain // 16 C3-qter|16 56.64 cM	Ets2	NM_011809		0.0490403	7.17606	0.229696	0.114848	6.7958	0.206701	0.103351	0.0490403	1.30158	1.30158	HIGH n-6/n-3 up vs Low n-6n-3
17232	17327660	NM_026508 // Trap1 // TNF receptor-associated protein 1 // 16 A1|16 2.38 cM // 68015 //	Trap1	NM_026508		0.0224576	6.9249	0.0918642	0.0459321	6.67807	0.133138	0.0665689	0.0224576	1.1866	1.1866	HIGH n-6/n-3 up vs Low n-6n-3
17268	17328062	NM_007929 // Emp2 // epithelial membrane protein 2 // 16 A1|16 5.54 cM // 13731 /// ENS	Emp2	NM_007929		0.0191459	4.96123	0.152448	0.0762241	4.41389	0.30899	0.154495	0.0191459	1.46139	1.46139	HIGH n-6/n-3 up vs Low n-6n-3
17292	17328277	NM_001291009 // Pla2g10 // phospholipase A2, group X // 16 A1|16 9.5 cM // 26565 /// NM	Pla2g10	NM_001291009		0.00866259	2.48859	0.0855135	0.0427567	2.67757	0.0492782	0.0246391	0.00866259	0.877222	-1.13996	HIGH n-6/n-3 down vs Low n-6n-3
17299	17328411	NM_025345 // Fopnl // Fgfr1op N-terminal like // 16|16 B1 // 66086 /// ENSMUST000000233	Fopnl	NM_025345		0.0239692	6.46469	0.16945	0.0847248	6.18723	0.0739668	0.0369834	0.0239692	1.21205	1.21205	HIGH n-6/n-3 up vs Low n-6n-3
17332	17328810	NM_001081633 // Dgcr14 // DiGeorge syndrome critical region gene 14 // 16 B1-B3|16 11.0	Dgcr14	NM_001081633		0.0478183	4.93929	0.1888	0.0943998	4.62276	0.171832	0.0859158	0.0478183	1.24533	1.24533	HIGH n-6/n-3 up vs Low n-6n-3
17334	17328829	NM_153150 // Slc25a1 // solute carrier family 25 (mitochondrial carrier, citrate transp	Slc25a1	NM_153150		0.00986473	8.04877	0.338804	0.169402	7.29845	0.21917	0.109585	0.00986473	1.68217	1.68217	HIGH n-6/n-3 up vs Low n-6n-3
17337	17328870	NM_172151 // Zdhhc8 // zinc finger, DHHC domain containing 8 // 16 A3|16 11.29 cM // 27	Zdhhc8	NM_172151		0.0311514	4.60171	0.17225	0.0861248	4.12018	0.297664	0.148832	0.0311514	1.39622	1.39622	HIGH n-6/n-3 up vs Low n-6n-3
17370	17329151	NM_145939 // Alg3 // asparagine-linked glycosylation 3 (alpha-1,3-mannosyltransferase)	Alg3	NM_145939		0.00527487	5.26492	0.184215	0.0921077	4.84306	0.0717209	0.0358605	0.00527487	1.33965	1.33965	HIGH n-6/n-3 up vs Low n-6n-3
17401	17329479	NM_016674 // Cldn1 // claudin 1 // 16 B2|16 // 12737 /// ENSMUST00000023154 // Cldn1 //	Cldn1	NM_016674		0.00375334	3.97938	0.199261	0.0996307	3.2278	0.260401	0.130201	0.00375334	1.68364	1.68364	HIGH n-6/n-3 up vs Low n-6n-3
17466	17330141	NM_001033239 // Csta1 // cystatin A1 // 16 B3|16 // 209294 /// ENSMUST00000096090 // Cs	Csta1	NM_001033239		0.0272816	2.09202	0.0994498	0.0497249	2.39521	0.183813	0.0919067	0.0272816	0.810456	-1.23387	HIGH n-6/n-3 down vs Low n-6n-3
17467	17330148	ENSMUST00000157846 // Gm23080 // predicted gene, 23080 // --- // ---	Gm23080	ENSMUST00000157846		0.0478607	3.63912	0.636568	0.318284	4.47325	0.218175	0.109088	0.0478607	0.56092	-1.78278	HIGH n-6/n-3 down vs Low n-6n-3
17469	17330152	ENSMUST00000179667 // Gm25024 // predicted gene, 25024 // --- // ---	Gm25024	ENSMUST00000179667		0.00311214	1.93085	0.109048	0.054524	2.21913	0.0524621	0.026231	0.00311214	0.81888	-1.22118	HIGH n-6/n-3 down vs Low n-6n-3
17516	17330602	NM_001159329 // Gtpbp8 // GTP-binding protein 8 (putative) // 16|16 B5 // 66067 /// NM_	Gtpbp8	NM_001159329		0.035642	4.94686	0.35512	0.17756	4.30735	0.313882	0.156941	0.035642	1.5578	1.5578	HIGH n-6/n-3 up vs Low n-6n-3
17564	17331044	NM_001252443 // Tfg // Trk-fused gene // 16 C1.1|16 // 21787 /// NM_019678 // Tfg // Tr	Tfg	NM_001252443		0.0315921	5.82123	0.134244	0.0671221	5.53144	0.15857	0.0792852	0.0315921	1.22247	1.22247	HIGH n-6/n-3 up vs Low n-6n-3
17572	17331148	XM_006522459 // Cmss1 // cms small ribosomal subunit 1 // 16 C1.1|16 // 66497 /// XM_00	Cmss1	XM_006522459		0.0287967	4.9572	0.0600674	0.0300337	4.61377	0.232517	0.116259	0.0287967	1.26877	1.26877	HIGH n-6/n-3 up vs Low n-6n-3
17613	17331380	NM_010140 // Epha3 // Eph receptor A3 // 16 C1.3|16 // 13837 /// ENSMUST00000064405 //	Epha3	NM_010140		0.0147337	3.51168	0.20279	0.101395	2.91383	0.288996	0.144498	0.0147337	1.51346	1.51346	HIGH n-6/n-3 up vs Low n-6n-3
17766	17332737	ENSMUST00000180078 // Gm23186 // predicted gene, 23186 // --- // ---	Gm23186	ENSMUST00000180078		0.0457146	2.74139	0.218407	0.109203	3.21792	0.310037	0.155018	0.0457146	0.718706	-1.39139	HIGH n-6/n-3 down vs Low n-6n-3
17814	17333323	NM_001290712 // Tcp1 // t-complex protein 1 // 17 A3-B|17 8.72 cM // 21454 /// NM_01368	Tcp1	NM_001290712		0.0462712	8.43019	0.138461	0.0692305	8.10454	0.220175	0.110088	0.0462712	1.25323	1.25323	HIGH n-6/n-3 up vs Low n-6n-3
17826	17333416	ENSMUST00000104161 // Gm24867 // predicted gene, 24867 // --- // ---	Gm24867	ENSMUST00000104161		0.025874	2.3435	0.114357	0.0571786	2.80394	0.291357	0.145679	0.025874	0.726761	-1.37597	HIGH n-6/n-3 down vs Low n-6n-3																							0	0	0
17832	17333493	NM_001123370 // 9030025P20Rik // RIKEN cDNA 9030025P20 gene // 17 A2|17 8.95 cM // 1000	9030025P20Rik	NM_001123370		0.0470892	4.23903	0.113271	0.0566353	3.84553	0.294916	0.147458	0.0470892	1.31358	1.31358	HIGH n-6/n-3 up vs Low n-6n-3
17833	17333505	NM_001123372 // Gm3435 // predicted gene 3435 // 17 A2|17 // 100041621 /// XM_006523370	Gm3435	NM_001123372		0.0382051	5.85372	0.138714	0.0693569	5.39109	0.320921	0.16046	0.0382051	1.37806	1.37806	HIGH n-6/n-3 up vs Low n-6n-3
17842	17333651	NM_011765 // Zfp97 // zinc finger protein 97 // 17 A3.1|17 // 22759 /// ENSMUST00000147	Zfp97	NM_011765		0.0165607	2.75429	0.0986929	0.0493465	2.47337	0.139206	0.069603	0.0165607	1.21497	1.21497	HIGH n-6/n-3 up vs Low n-6n-3
17869	17333833	NM_001104569 // Vmn2r107 // vomeronasal 2, receptor 107 // 17 A3.2|17 // 22312 /// ENSM	Vmn2r107	NM_001104569		0.0266009	2.44627	0.148622	0.0743111	2.73561	0.131011	0.0655053	0.0266009	0.818273	-1.22209	HIGH n-6/n-3 down vs Low n-6n-3
17895	17333966	NM_001008501 // Zfp760 // zinc finger protein 760 // 17 A3.2-A3.3|17 // 240034 /// ENSM	Zfp760	NM_001008501		0.0421023	4.494	0.376583	0.188291	3.98679	0.116168	0.058084	0.0421023	1.42131	1.42131	HIGH n-6/n-3 up vs Low n-6n-3
17929	17334205	NM_001039581 // Abca3 // ATP-binding cassette, sub-family A (ABC1), member 3 // 17 A3.3	Abca3	NM_001039581		0.0244124	4.76634	0.111201	0.0556004	4.52698	0.115409	0.0577047	0.0244124	1.18047	1.18047	HIGH n-6/n-3 up vs Low n-6n-3
17973	17334749	NM_026238 // Narfl // nuclear prelamin A recognition factor-like // 17 A3.3|17 // 67563	Narfl	NM_026238		0.024884	4.78579	0.223511	0.111755	4.33604	0.20403	0.102015	0.024884	1.3658	1.3658	HIGH n-6/n-3 up vs Low n-6n-3
17978	17334803	NM_028101 // Jmjd8 // jumonji domain containing 8 // 17|17 B1 // 72106 /// ENSMUST00000	Jmjd8	NM_028101		0.00604476	6.55021	0.103267	0.0516336	6.05366	0.216194	0.108097	0.00604476	1.41084	1.41084	HIGH n-6/n-3 up vs Low n-6n-3																							0	0	0
17991	17334929	ENSMUST00000090257 // Gm8225 // predicted gene 8225 // --- // ---	Gm8225	ENSMUST00000090257		0.04329	2.16297	0.136563	0.0682814	2.56763	0.28603	0.143015	0.04329	0.755411	-1.32378	HIGH n-6/n-3 down vs Low n-6n-3
17992	17334932	NM_026170 // Ergic1 // endoplasmic reticulum-golgi intermediate compartment (ERGIC) 1 /	Ergic1	NM_026170		0.0463557	7.4599	0.18909	0.0945449	7.09772	0.219116	0.109558	0.0463557	1.28537	1.28537	HIGH n-6/n-3 up vs Low n-6n-3																							0	0	0
18013	17335204	NM_001286040 // Anks1 // ankyrin repeat and SAM domain containing 1 // 17 A3.3|17 // 22	Anks1	NM_001286040		0.0370863	4.97322	0.119374	0.0596871	4.61928	0.236864	0.118432	0.0370863	1.27805	1.27805	HIGH n-6/n-3 up vs Low n-6n-3
18038	17335493	XM_006525174 // BC004004 // cDNA sequence BC004004 // 17|17 B1 // 80748 /// ENSMUST0000	BC004004	XM_006525174		0.035961	7.83376	0.113519	0.0567596	7.49267	0.226568	0.113284	0.035961	1.26671	1.26671	HIGH n-6/n-3 up vs Low n-6n-3
18087	17336144	NM_026712 // Zfp414 // zinc finger protein 414 // 17|17 B2 // 328801 /// NR_034153 // Z	Zfp414	NM_026712		0.00414573	4.31681	0.104361	0.0521803	3.92531	0.139692	0.0698458	0.00414573	1.31176	1.31176	HIGH n-6/n-3 up vs Low n-6n-3
18092	17336190	NR_103516 // Ndufa7 // NADH dehydrogenase (ubiquinone) 1 alpha subcomplex, 7 (B14.5a) /	Ndufa7	NR_103516		0.0433751	5.43618	0.39939	0.199695	4.7777	0.326804	0.163402	0.0433751	1.57842	1.57842	HIGH n-6/n-3 up vs Low n-6n-3																							0	0	0
18095	17336213	NM_001199733 // Daxx // Fas death domain-associated protein // 17 B1|17 17.98 cM // 131	Daxx	NM_001199733		0.0182257	5.22309	0.105071	0.0525353	4.84796	0.208277	0.104139	0.0182257	1.29696	1.29696	HIGH n-6/n-3 up vs Low n-6n-3
18218	17337434	NM_201611 // H2-M10.6 // histocompatibility 2, M region locus 10.6 // 17 B1|17 // 39954	H2-M10.6	NM_201611		0.000751989	2.09937	0.0297225	0.0148612	2.68504	0.183841	0.0919204	0.000751989	0.66634	-1.50074	HIGH n-6/n-3 down vs Low n-6n-3
18312	17338136	NM_025611 // Cul7 // cullin 7 // 17 C|17 // 66515 /// ENSMUST00000043464 // Cul7 // cul	Cul7	NM_025611		0.00772205	5.56593	0.0846972	0.0423486	5.13091	0.204606	0.102303	0.00772205	1.35193	1.35193	HIGH n-6/n-3 up vs Low n-6n-3
18381	17338872	NM_027244 // Ndufa11 // NADH dehydrogenase (ubiquinone) 1 alpha subcomplex 11 // 17|17	Ndufa11	NM_027244		0.0380648	3.22624	0.244639	0.12232	2.77996	0.23164	0.11582	0.0380648	1.36252	1.36252	HIGH n-6/n-3 up vs Low n-6n-3
18383	17338882	NM_144858 // Dus3l // dihydrouridine synthase 3-like (S. cerevisiae) // 17 D|17 // 2249	Dus3l	NM_144858		0.0187217	4.45016	0.108873	0.0544364	4.13783	0.16241	0.0812049	0.0187217	1.24172	1.24172	HIGH n-6/n-3 up vs Low n-6n-3
18405	17339172	ENSMUST00000083372 // Gm23264 // predicted gene, 23264 // --- // ---	Gm23264	ENSMUST00000083372		0.0376203	7.02121	0.454806	0.227403	8.18413	0.747515	0.373757	0.0376203	0.44661	-2.23909	HIGH n-6/n-3 down vs Low n-6n-3
18414	17339313	NM_013813 // Epb4.1l3 // erythrocyte protein band 4.1-like 3 // 17 E1.3|17 40.15 cM //	Epb4.1l3	NM_013813		0.0471265	4.04099	0.17579	0.087895	3.72309	0.185121	0.0925606	0.0471265	1.24652	1.24652	HIGH n-6/n-3 up vs Low n-6n-3
18442	17339604	NM_001252478 // Slc30a6 // solute carrier family 30 (zinc transporter), member 6 // 17	Slc30a6	NM_001252478		0.00759677	5.63705	0.213226	0.106613	5.20513	0.0502752	0.0251376	0.00759677	1.34903	1.34903	HIGH n-6/n-3 up vs Low n-6n-3
18525	17340500	NM_026468 // Atp5g2 // ATP synthase, H+ transporting, mitochondrial F0 complex, subunit	Atp5g2	NM_026468		0.0460354	9.0243	0.397527	0.198763	8.35394	0.357459	0.178729	0.0460354	1.59147	1.59147	HIGH n-6/n-3 up vs Low n-6n-3
18545	17340702	ENSMUST00000160545 // E430024P14Rik // RIKEN cDNA E430024P14 gene // 17|17 // 320936 //	E430024P14Rik	ENSMUST00000160545		0.0305671	2.62535	0.0751981	0.037599	2.94429	0.213786	0.106893	0.0305671	0.801659	-1.24741	HIGH n-6/n-3 down vs Low n-6n-3
18566	17340943	NM_026310 // Mrpl18 // mitochondrial ribosomal protein L18 // 17|17 A2 // 67681 /// XM_	Mrpl18	NM_026310		0.01738	6.67816	0.127905	0.0639523	6.40205	0.111541	0.0557707	0.01738	1.21093	1.21093	HIGH n-6/n-3 up vs Low n-6n-3
18589	17341132	NM_024250 // Phf10 // PHD finger protein 10 // 17|17 A2 // 72057 /// ENSMUST00000024657	Phf10	NM_024250		0.026648	7.14875	0.124847	0.0624234	6.84545	0.166085	0.0830424	0.026648	1.23397	1.23397	HIGH n-6/n-3 up vs Low n-6n-3
18696	17341872	NM_001252463 // Mlst8 // MTOR associated protein, LST8 homolog (S. cerevisiae) // 17 A3	Mlst8	NM_001252463		0.00866378	5.01602	0.114393	0.0571964	4.59357	0.188653	0.0943266	0.00866378	1.3402	1.3402	HIGH n-6/n-3 up vs Low n-6n-3
18697	17341883	NM_001172113 // Traf7 // TNF receptor-associated factor 7 // 17 A3.3|17 // 224619 /// N	Traf7	NM_001172113		0.0273866	6.72928	0.115363	0.0576814	6.31681	0.260173	0.130086	0.0273866	1.33096	1.33096	HIGH n-6/n-3 up vs Low n-6n-3
18752	17342359	NM_001271434 // Haghl // hydroxyacylglutathione hydrolase-like // 17 A3.3|17 // 68977 /	Haghl	NM_001271434		0.00141416	3.12395	0.0749692	0.0374846	2.66829	0.145288	0.0726439	0.00141416	1.37141	1.37141	HIGH n-6/n-3 up vs Low n-6n-3
18755	17342392	NM_019719 // Stub1 // STIP1 homology and U-Box containing protein 1 // 17 B1|17 12.93 c	Stub1	NM_019719		0.0474432	6.47196	0.210417	0.105208	6.09207	0.221716	0.110858	0.0474432	1.30124	1.30124	HIGH n-6/n-3 up vs Low n-6n-3
18763	17342509	NM_001291025 // Pigq // phosphatidylinositol glycan anchor biosynthesis, class Q // 17|	Pigq	NM_001291025		0.0406527	6.84327	0.201485	0.100743	6.44335	0.232439	0.11622	0.0406527	1.31944	1.31944	HIGH n-6/n-3 up vs Low n-6n-3
18834	17343251	NM_001163769 // U2af1 // U2 small nuclear ribonucleoprotein auxiliary factor (U2AF) 1 /	U2af1	NM_001163769		0.0207066	6.90027	0.164839	0.0824195	6.5087	0.189792	0.0948961	0.0207066	1.31182	1.31182	HIGH n-6/n-3 up vs Low n-6n-3
18843	17343405	NM_011717 // Wiz // widely-interspaced zinc finger motifs // 17|17 B2 // 22404 /// XM_0	Wiz	NM_011717		0.00439718	4.64586	0.104883	0.0524414	4.37716	0.0606535	0.0303267	0.00439718	1.20472	1.20472	HIGH n-6/n-3 up vs Low n-6n-3
18847	17343469	NM_001267583 // Zfp811 // zinc finger protein 811 // 17 B1|17 // 240063 /// NM_183177 /	Zfp811	NM_001267583		0.0211393	1.89923	0.14395	0.0719752	2.16959	0.0985803	0.0492901	0.0211393	0.829116	-1.2061	HIGH n-6/n-3 down vs Low n-6n-3
18920	17344132	NM_010479 // Hspa1a // heat shock protein 1A // 17 B1|17 18.51 cM // 193740 /// ENSMUST	Hspa1a	NM_010479		0.0111283	3.81593	0.160146	0.0800729	3.52149	0.0291639	0.0145819	0.0111283	1.22641	1.22641	HIGH n-6/n-3 up vs Low n-6n-3
18931	17344242	NM_018816 // Apom // apolipoprotein M // 17|17 B2 // 55938 /// ENSMUST00000025249 // Ap	Apom	NM_018816		0.00158576	2.12731	0.0722814	0.0361407	2.41707	0.0779577	0.0389789	0.00158576	0.818041	-1.22243	HIGH n-6/n-3 down vs Low n-6n-3
18931	17344242	NM_018816 // Apom // apolipoprotein M // 17|17 B2 // 55938 /// ENSMUST00000025249 // Ap	Apom	NM_018816		0.00158576	2.12731	0.0722814	0.0361407	2.41707	0.0779577	0.0389789	0.00158576	0.818041	-1.22243	HIGH n-6/n-3 down vs Low n-6n-3
18932	17344251	NM_001199044 // Prrc2a // proline-rich coiled-coil 2A // 17 B1|17 18.59 cM // 53761 ///	Prrc2a	NM_001199044		0.0175083	5.96338	0.118665	0.0593326	5.62029	0.17478	0.0873898	0.0175083	1.26847	1.26847	HIGH n-6/n-3 up vs Low n-6n-3
18942	17344336	NM_001163763 // Tcf19 // transcription factor 19 // 17 B1|17 // 106795 /// NM_001163764	Tcf19	NM_001163763		0.0169821	4.28194	0.133328	0.0666642	3.80784	0.257257	0.128629	0.0169821	1.38906	1.38906	HIGH n-6/n-3 up vs Low n-6n-3
18988	17344765	NM_001024134 // Trim15 // tripartite motif-containing 15 // 17 B1|17 // 69097 /// NM_00	Trim15	NM_001024134		0.0435405	2.17796	0.109268	0.0546338	2.52366	0.248249	0.124124	0.0435405	0.786923	-1.27077	HIGH n-6/n-3 down vs Low n-6n-3
19054	17345262	NM_198167 // Tmem63b // transmembrane protein 63b // 17 B3|17 // 224807 /// ENSMUST0000	Tmem63b	NM_198167		0.0366096	5.27959	0.190151	0.0950757	4.99313	0.0979417	0.0489708	0.0366096	1.21964	1.21964	HIGH n-6/n-3 up vs Low n-6n-3
19064	17345321	NM_030715 // Polh // polymerase (DNA directed), eta (RAD 30 related) // 17|17 C // 8090	Polh	NM_030715		0.0420994	4.30905	0.167318	0.0836589	4.02255	0.146814	0.073407	0.0420994	1.21968	1.21968	HIGH n-6/n-3 up vs Low n-6n-3
19074	17345499	NM_029091 // Klc4 // kinesin light chain 4 // 17 C|17 // 74764 /// XM_006525042 // Klc4	Klc4	NM_029091		0.00759831	4.31737	0.113111	0.0565553	4.59787	0.0863017	0.0431508	0.00759831	0.823309	-1.21461	HIGH n-6/n-3 down vs Low n-6n-3
19077	17345542	NM_009358 // Ppp2r5d // protein phosphatase 2, regulatory subunit B, delta // 17 C|17 2	Ppp2r5d	NM_009358		0.0256727	6.11995	0.127347	0.0636735	5.83277	0.14743	0.073715	0.0256727	1.22025	1.22025	HIGH n-6/n-3 up vs Low n-6n-3
19083	17345607	ENSMUST00000086675 // A330017A19Rik // RIKEN cDNA A330017A19 gene // 17 C|17 // 442840	A330017A19Rik	ENSMUST00000086675		0.0353076	2.90123	0.102137	0.0510683	3.17554	0.175158	0.0875789	0.0353076	0.826849	-1.20941	HIGH n-6/n-3 down vs Low n-6n-3
19132	17346069	NM_146249 // Zfp119b // zinc finger protein 119b // 17 D|17 // 240120 /// ENSMUST000000	Zfp119b	NM_146249		0.042672	3.42923	0.233747	0.116874	2.9498	0.291903	0.145951	0.042672	1.3942	1.3942	HIGH n-6/n-3 up vs Low n-6n-3
19186	17346713	ENSMUST00000104503 // Gm25344 // predicted gene, 25344 // --- // ---	Gm25344	ENSMUST00000104503		0.00669306	1.74972	0.0531781	0.026589	2.06928	0.148396	0.0741979	0.00669306	0.801316	-1.24795	HIGH n-6/n-3 down vs Low n-6n-3
19215	17347061	ENSMUST00000158480 // Gm23115 // predicted gene, 23115 // --- // ---	Gm23115	ENSMUST00000158480		0.0111147	2.64668	0.233161	0.11658	2.16183	0.132082	0.066041	0.0111147	1.39944	1.39944	HIGH n-6/n-3 up vs Low n-6n-3
19226	17347210	NM_133771 // Memo1 // mediator of cell motility 1 // 17 E2|17 // 76890 /// XM_006525108	Memo1	NM_133771		0.0293789	5.71329	0.0729164	0.0364582	5.40549	0.203732	0.101866	0.0293789	1.23782	1.23782	HIGH n-6/n-3 up vs Low n-6n-3
19266	17347680	NM_001001806 // Zfp36l2 // zinc finger protein 36, C3H type-like 2 // 17 E4|17 // 12193	Zfp36l2	NM_001001806		0.0212407	7.12046	0.248163	0.124082	6.64389	0.182286	0.0911429	0.0212407	1.39143	1.39143	HIGH n-6/n-3 up vs Low n-6n-3
19302	17348054	BC099943 // Mettl4 // methyltransferase like 4 // 17 E5|17 // 76781 /// NM_176917 // Me	Mettl4	BC099943		0.00472046	4.33092	0.185667	0.0928337	3.84827	0.1197	0.0598502	0.00472046	1.39731	1.39731	HIGH n-6/n-3 up vs Low n-6n-3
19304	17348074	ENSMUST00000083724 // Gm23102 // predicted gene, 23102 // --- // ---	Gm23102	ENSMUST00000083724		0.0103954	2.65026	0.119519	0.0597597	3.00409	0.151	0.0755	0.0103954	0.782501	-1.27795	HIGH n-6/n-3 down vs Low n-6n-3
19377	17348701	ENSMUST00000104117 // Gm22470 // predicted gene, 22470 // --- // ---	Gm22470	ENSMUST00000104117		0.0122239	2.8189	0.17689	0.088445	3.25795	0.173929	0.0869645	0.0122239	0.73762	-1.35571	HIGH n-6/n-3 down vs Low n-6n-3
19380	17348707	NM_181680 // Dsg1c // desmoglein 1 gamma // 18 A2|18 11.26 cM // 211924 /// ENSMUST0000	Dsg1c	NM_181680		0.0369515	2.10838	0.11092	0.0554602	2.37593	0.166784	0.0833918	0.0369515	0.830727	-1.20376	HIGH n-6/n-3 down vs Low n-6n-3
19401	17348990	NM_021448 // Elp2 // elongator acetyltransferase complex subunit 2 // 18 A2|18 // 58523	Elp2	NM_021448		0.0360746	6.2614	0.139694	0.0698471	5.9372	0.196491	0.0982456	0.0360746	1.25198	1.25198	HIGH n-6/n-3 up vs Low n-6n-3
19424	17349262	NM_133658 // Ercc3 // excision repair cross-complementing rodent repair deficiency, com	Ercc3	NM_133658		0.0146193	5.82034	0.109742	0.0548711	5.48522	0.164239	0.0821197	0.0146193	1.26148	1.26148	HIGH n-6/n-3 up vs Low n-6n-3
19460	17349627	ENSMUST00000051301 // Pura // purine rich element binding protein A // 18|18 B3 // 1929	Pura	ENSMUST00000051301		0.00885704	3.97162	0.0964915	0.0482458	3.68183	0.117564	0.058782	0.00885704	1.22246	1.22246	HIGH n-6/n-3 up vs Low n-6n-3
19504	17349993	NM_001164621 // Rnf14 // ring finger protein 14 // 18 B3|18 20.2 cM // 56736 /// NM_020	Rnf14	NM_001164621		0.0425289	6.8294	0.12799	0.0639951	6.54159	0.184164	0.0920822	0.0425289	1.22078	1.22078	HIGH n-6/n-3 up vs Low n-6n-3
19595	17350869	NM_025478 // Isoc1 // isochorismatase domain containing 1 // 18 D2|18 // 66307 /// ENSM	Isoc1	NM_025478		0.0290431	7.94769	0.149738	0.0748688	7.59594	0.195842	0.0979211	0.0290431	1.27611	1.27611	HIGH n-6/n-3 up vs Low n-6n-3
19657	17351485	NM_134138 // Psmg2 // proteasome (prosome, macropain) assembly chaperone 2 // 18 E1|18	Psmg2	NM_134138		0.0346529	5.72142	0.217009	0.108504	5.22327	0.295117	0.147559	0.0346529	1.4124	1.4124	HIGH n-6/n-3 up vs Low n-6n-3
19678	17351708	NM_028868 // Cxxc1 // CXXC finger 1 (PHD domain) // 18 E2|18 // 74322 /// ENSMUST000000	Cxxc1	NM_028868		0.0033611	6.22566	0.164795	0.0823974	5.73485	0.129038	0.0645191	0.0033611	1.40523	1.40523	HIGH n-6/n-3 up vs Low n-6n-3
19759	17352580	NM_026484 // Ccny // cyclin Y // 18 A1|18 // 67974 /// XM_006526198 // Ccny // cyclin Y	Ccny	NM_026484		0.0113958	7.75314	0.129599	0.0647995	7.3518	0.181602	0.0908011	0.0113958	1.32074	1.32074	HIGH n-6/n-3 up vs Low n-6n-3																							0	0	0
19763	17352603	NM_001038589 // Usp14 // ubiquitin specific peptidase 14 // 18 A1|18 4.91 cM // 59025 /	Usp14	NM_001038589		0.0191994	6.60559	0.212595	0.106298	6.22605	0.109401	0.0547004	0.0191994	1.30093	1.30093	HIGH n-6/n-3 up vs Low n-6n-3
19781	17352835	NM_001161369 // Ss18 // synovial sarcoma translocation, Chromosome 18 // 18|18 B1 // 26	Ss18	NM_001161369		0.00491928	6.0388	0.13027	0.065135	5.69204	0.0930704	0.0465352	0.00491928	1.2717	1.2717	HIGH n-6/n-3 up vs Low n-6n-3
19799	17353030	ENSMUST00000157924 // Gm24959 // predicted gene, 24959 // --- // ---	Gm24959	ENSMUST00000157924		0.0451468	2.63538	0.312463	0.156231	3.10747	0.206141	0.10307	0.0451468	0.720918	-1.38712	HIGH n-6/n-3 down vs Low n-6n-3
19814	17353171	NM_001004361 // Tpgs2 // tubulin polyglutamylase complex subunit 2 // 18 A2|18 // 66648	Tpgs2	NM_001004361		0.00507573	5.10077	0.159247	0.0796236	4.68754	0.107369	0.0536846	0.00507573	1.33166	1.33166	HIGH n-6/n-3 up vs Low n-6n-3
19843	17353407	ENSMUST00000157988 // Gm23411 // predicted gene, 23411 // --- // ---	Gm23411	ENSMUST00000157988		0.00977902	1.92518	0.104903	0.0524513	2.31767	0.182682	0.0913411	0.00977902	0.761812	-1.31266	HIGH n-6/n-3 down vs Low n-6n-3
19930	17354275	NM_025698 // Tmed7 // transmembrane emp24 protein transport domain containing 7 // 18 C	Tmed7	NM_025698		0.00903958	7.86978	0.205867	0.102934	7.40226	0.135594	0.0677969	0.00903958	1.38274	1.38274	HIGH n-6/n-3 up vs Low n-6n-3
19932	17354290	NM_026217 // Atg12 // autophagy related 12 // 18 C|18 // 67526 /// ENSMUST00000035648 /	Atg12	NM_026217		0.0265453	5.02371	0.146114	0.0730571	4.69214	0.173605	0.0868026	0.0265453	1.25838	1.25838	HIGH n-6/n-3 up vs Low n-6n-3
19945	17354378	NM_008908 // Ppic // peptidylprolyl isomerase C // 18 D1|18 // 19038 /// ENSMUST0000002	Ppic	NM_008908		0.0494388	8.63665	0.358055	0.179027	7.98721	0.389442	0.194721	0.0494388	1.56856	1.56856	HIGH n-6/n-3 up vs Low n-6n-3
19948	17354426	ENSMUST00000122572 // Gm24183 // predicted gene, 24183 // --- // ---	Gm24183	ENSMUST00000122572		0.0369569	2.64012	0.20446	0.10223	2.95525	0.117719	0.0588593	0.0369569	0.803779	-1.24412	HIGH n-6/n-3 down vs Low n-6n-3																							0	0	0
19965	17354589	NM_001034859 // Gm4841 // predicted gene 4841 // 18 D3|18 // 225594 /// ENSMUST00000090	Gm4841	NM_001034859		0.00961987	2.41769	0.147352	0.0736758	2.75273	0.101898	0.050949	0.00961987	0.792764	-1.26141	HIGH n-6/n-3 down vs Low n-6n-3
19985	17354804	NM_021296 // Grpel2 // GrpE-like 2, mitochondrial // 18|18 D3 // 17714 /// ENSMUST00000	Grpel2	NM_021296		0.0157187	4.6407	0.132003	0.0660017	4.30548	0.151665	0.0758326	0.0157187	1.26157	1.26157	HIGH n-6/n-3 up vs Low n-6n-3
19986	17354810	NM_178928 // Afap1l1 // actin filament associated protein 1-like 1 // 18 E1|18 // 10687	Afap1l1	NM_178928		0.0304667	5.59328	0.282215	0.141108	5.15938	0.123463	0.0617317	0.0304667	1.35088	1.35088	HIGH n-6/n-3 up vs Low n-6n-3
20020	17355231	NM_001127177 // Ptpn2 // protein tyrosine phosphatase, non-receptor type 2 // 18 E1|18	Ptpn2	NM_001127177		0.0128909	5.69068	0.192431	0.0962156	5.26448	0.149745	0.0748723	0.0128909	1.34369	1.34369	HIGH n-6/n-3 up vs Low n-6n-3
20035	17355366	NM_008540 // Smad4 // SMAD family member 4 // 18 E2|18 49.51 cM // 17128 /// ENSMUST000	Smad4	NM_008540		0.01428	7.30595	0.107356	0.0536781	7.01416	0.133141	0.0665704	0.01428	1.22416	1.22416	HIGH n-6/n-3 up vs Low n-6n-3
20056	17355538	NM_146089 // Haus1 // HAUS augmin-like complex, subunit 1 // 18 E3|18 // 225745 /// XM_	Haus1	NM_146089		0.0244662	4.92969	0.170393	0.0851964	4.60561	0.134549	0.0672744	0.0244662	1.25186	1.25186	HIGH n-6/n-3 up vs Low n-6n-3
20091	17355862	NM_025969 // Timm21 // tranlocase of inner mitochondrial membrane 21 // 18|18 E3 // 671	Timm21	NM_025969		0.0350618	6.72293	0.212129	0.106065	6.40527	0.0996189	0.0498095	0.0350618	1.24631	1.24631	HIGH n-6/n-3 up vs Low n-6n-3
20105	17356028	NM_001177438 // Aldh3b2 // aldehyde dehydrogenase 3 family, member B2 // 19 A|19 // 621	Aldh3b2	NM_001177438		0.0181951	3.90283	0.174212	0.087106	3.6172	0.0342506	0.0171253	0.0181951	1.21894	1.21894	HIGH n-6/n-3 up vs Low n-6n-3																							0	0	0
20151	17356490	NM_009045 // Rela // v-rel reticuloendotheliosis viral oncogene homolog A (avian) // 19	Rela	NM_009045		0.0106653	7.75923	0.20111	0.100555	7.09521	0.302828	0.151414	0.0106653	1.58449	1.58449	HIGH n-6/n-3 up vs Low n-6n-3
20227	17357236	NM_001136064 // Bscl2 // Berardinelli-Seip congenital lipodystrophy 2 homolog (seipin)	Bscl2	NM_001136064		0.0374103	7.24156	0.218401	0.1092	6.75196	0.295947	0.147974	0.0374103	1.40406	1.40406	HIGH n-6/n-3 up vs Low n-6n-3
20245	17357460	NM_146094 // Fads1 // fatty acid desaturase 1 // 19 A|19 // 76267 /// ENSMUST0000001080	Fads1	NM_146094		0.00467072	6.16113	0.164652	0.0823262	5.39704	0.307649	0.153824	0.00467072	1.6983	1.6983	HIGH n-6/n-3 up vs Low n-6n-3
20329	17357887	ENSMUST00000059675 // Olfr1444 // olfactory receptor 1444 // 19 C1|19 // 258697 /// BC1	Olfr1444	ENSMUST00000059675		0.0288961	2.15044	0.140777	0.0703883	2.45361	0.158768	0.0793842	0.0288961	0.81047	-1.23385	HIGH n-6/n-3 down vs Low n-6n-3
20347	17357930	NM_146636 // Olfr1487 // olfactory receptor 1487 // 19 C1|19 // 258629 /// ENSMUST00000	Olfr1487	NM_146636		0.0131989	2.93547	0.261341	0.130671	2.47593	0.0398752	0.0199376	0.0131989	1.3751	1.3751	HIGH n-6/n-3 up vs Low n-6n-3
20374	17358032	NM_026120 // 2410127L17Rik // RIKEN cDNA 2410127L17 gene // 19 E1|19 // 67383 /// XM_00	2410127L17Rik	NM_026120		0.031238	6.82607	0.27562	0.13781	6.43917	0.0224839	0.011242	0.031238	1.30758	1.30758	HIGH n-6/n-3 up vs Low n-6n-3
20421	17358544	NM_021893 // Cd274 // CD274 antigen // 19|19 C2 // 60533 /// ENSMUST00000016640 // Cd27	Cd274	NM_021893		0.0276282	4.95174	0.204654	0.102327	4.58783	0.146489	0.0732447	0.0276282	1.2869	1.2869	HIGH n-6/n-3 up vs Low n-6n-3
20437	17358682	NM_010799 // Minpp1 // multiple inositol polyphosphate histidine phosphatase 1 // 19 C1	Minpp1	NM_010799		0.00834693	5.94808	0.086631	0.0433155	5.43963	0.248677	0.124338	0.00834693	1.42252	1.42252	HIGH n-6/n-3 up vs Low n-6n-3																							0	0	0
20446	17358777	ENSMUST00000054956 // Stambpl1 // STAM binding protein like 1 // 19 C1|19 // 76630 ///	Stambpl1	ENSMUST00000054956		0.0143438	5.08737	0.108632	0.0543158	4.71453	0.189889	0.0949444	0.0143438	1.2949	1.2949	HIGH n-6/n-3 up vs Low n-6n-3
20447	17358797	NM_007987 // Fas // Fas (TNF receptor superfamily member 6) // 19 C1|19 29.48 cM // 141	Fas	NM_007987		0.0108206	6.44963	0.304852	0.152426	5.87705	0.0773356	0.0386678	0.0108206	1.48718	1.48718	HIGH n-6/n-3 up vs Low n-6n-3
20455	17358872	NR_035473 // Mir1950 // microRNA 1950 // 19|19 29.79 cM // 100316775 /// ENSMUST0000015	Mir1950	NR_035473		0.0469773	2.94906	0.11203	0.0560152	2.68111	0.183476	0.091738	0.0469773	1.2041	1.2041	HIGH n-6/n-3 up vs Low n-6n-3
20466	17359020	NM_010615 // Kif11 // kinesin family member 11 // 19 C2|19 // 16551 /// ENSMUST00000012	Kif11	NM_010615		0.018922	4.54741	0.174926	0.0874628	4.024	0.278082	0.139041	0.018922	1.43735	1.43735	HIGH n-6/n-3 up vs Low n-6n-3
20496	17359394	NM_172839 // Ccnj // cyclin J // 19 C3|19 // 240665 /// ENSMUST00000025983 // Ccnj // c	Ccnj	NM_172839		0.0134053	3.51512	0.144615	0.0723074	3.20779	0.102835	0.0514174	0.0134053	1.23741	1.23741	HIGH n-6/n-3 up vs Low n-6n-3
20510	17359488	NM_145500 // Ubtd1 // ubiquitin domain containing 1 // 19 C3|19 // 226122 /// XM_006526	Ubtd1	NM_145500		0.0167904	4.5682	0.0899928	0.0449964	4.20501	0.20224	0.10112	0.0167904	1.28627	1.28627	HIGH n-6/n-3 up vs Low n-6n-3
20532	17359689	NM_009128 // Scd2 // stearoyl-Coenzyme A desaturase 2 // 19 C3|19 37.98 cM // 20250 ///	Scd2	NM_009128		0.0271802	8.64367	0.391776	0.195888	7.93311	0.293153	0.146577	0.0271802	1.63645	1.63645	HIGH n-6/n-3 up vs Low n-6n-3
20545	17359834	NM_001037758 // Btrc // beta-transducin repeat containing protein // 19|19 D1 // 12234	Btrc	NM_001037758		0.0255595	6.2172	0.142132	0.0710658	5.8891	0.170951	0.0854753	0.0255595	1.25536	1.25536	HIGH n-6/n-3 up vs Low n-6n-3
20603	17360068	NM_001177812 // Wbp1l // WW domain binding protein 1 like // 19 C3|19 38.97 cM // 22617	Wbp1l	NM_001177812		0.0305759	5.82567	0.121329	0.0606644	5.51951	0.180594	0.0902971	0.0305759	1.23642	1.23642	HIGH n-6/n-3 up vs Low n-6n-3
20605	17360084	NM_020577 // As3mt // arsenic (+3 oxidation state) methyltransferase // 19|19 D1 // 573	As3mt	NM_020577		0.0083033	4.84922	0.135626	0.0678132	4.46127	0.147933	0.0739667	0.0083033	1.30854	1.30854	HIGH n-6/n-3 up vs Low n-6n-3
20632	17360427	NM_001168505 // Shoc2 // soc-2 (suppressor of clear) homolog (C. elegans) // 19 D2|19 /	Shoc2	NM_001168505		0.0245895	6.76216	0.0222256	0.0111128	6.49511	0.177759	0.0888797	0.0245895	1.20335	1.20335	HIGH n-6/n-3 up vs Low n-6n-3
20683	17361008	NM_001136091 // Tcirg1 // T cell, immune regulator 1, ATPase, H+ transporting, lysosoma	Tcirg1	NM_001136091		0.0375488	4.13914	0.335888	0.167944	3.61441	0.207119	0.10356	0.0375488	1.43867	1.43867	HIGH n-6/n-3 up vs Low n-6n-3
20689	17361081	NM_181796 // Gstp2 // glutathione S-transferase, pi 2 // 19 A|19 3.75 cM // 14869 /// E	Gstp2	NM_181796		0.033531	7.30602	0.243734	0.121867	6.70196	0.366544	0.183272	0.033531	1.51999	1.51999	HIGH n-6/n-3 up vs Low n-6n-3
20750	17361915	NM_026246 // Mrpl49 // mitochondrial ribosomal protein L49 // 19 A|19 4.34 cM // 18120	Mrpl49	NM_026246		0.0392892	5.64986	0.137786	0.0688928	5.37186	0.160801	0.0804007	0.0392892	1.21251	1.21251	HIGH n-6/n-3 up vs Low n-6n-3
20804	17362521	NR_027866 // 5730408K05Rik // RIKEN cDNA 5730408K05 gene // 19|19 // 67531 /// NR_03959	5730408K05Rik	NR_027866		0.014037	3.31505	0.145923	0.0729616	3.67769	0.153354	0.0766768	0.014037	0.777743	-1.28577	HIGH n-6/n-3 down vs Low n-6n-3
20820	17362689	NM_025333 // Sdhaf2 // succinate dehydrogenase complex assembly factor 2 // 19 A|19 //	Sdhaf2	NM_025333		0.00344561	6.19451	0.105995	0.0529977	5.86088	0.0959964	0.0479982	0.00344561	1.26018	1.26018	HIGH n-6/n-3 up vs Low n-6n-3
20887	17363156	ENSMUST00000103832 // Gm22323 // predicted gene, 22323 // --- // --- /// ENSMUST0000010	Gm22323	ENSMUST00000103832		0.00387547	2.50502	0.105091	0.0525457	2.13773	0.122373	0.0611867	0.00387547	1.28993	1.28993	HIGH n-6/n-3 up vs Low n-6n-3
20888	17363158	ENSMUST00000103832 // Gm22323 // predicted gene, 22323 // --- // --- /// ENSMUST0000010	Gm22323	ENSMUST00000103832		0.00387547	2.50502	0.105091	0.0525457	2.13773	0.122373	0.0611867	0.00387547	1.28993	1.28993	HIGH n-6/n-3 up vs Low n-6n-3
20915	17363488	ENSMUST00000038830 // 1110059E24Rik // RIKEN cDNA 1110059E24 gene // 19|19 C1 // 66206	1110059E24Rik	ENSMUST00000038830		0.0255021	6.44164	0.239792	0.119896	6.03308	0.138019	0.0690095	0.0255021	1.32736	1.32736	HIGH n-6/n-3 up vs Low n-6n-3
20925	17363624	NM_026520 // Fam122a // family with sequence similarity 122, member A // 19|19 C1 // 68	Fam122a	NM_026520		0.00542944	4.98566	0.127594	0.063797	4.6652	0.0809292	0.0404646	0.00542944	1.24872	1.24872	HIGH n-6/n-3 up vs Low n-6n-3																							0	0	0
20945	17363779	NM_021299 // Ak3 // adenylate kinase 3 // 19 C1|19 // 56248 /// ENSMUST00000025696 // A	Ak3	NM_021299		0.0169915	8.33269	0.217765	0.108882	7.79198	0.24862	0.12431	0.0169915	1.45469	1.45469	HIGH n-6/n-3 up vs Low n-6n-3
20949	17363799	XM_006527306 // Plgrkt // plasminogen receptor, C-terminal lysine transmembrane protein	Plgrkt	XM_006527306		0.0344577	5.85732	0.231967	0.115984	5.45358	0.184553	0.0922767	0.0344577	1.32293	1.32293	HIGH n-6/n-3 up vs Low n-6n-3
20960	17363927	NM_018830 // Asah2 // N-acylsphingosine amidohydrolase 2 // 19|19 C3 // 54447 /// ENSMU	Asah2	NM_018830		0.0107062	5.71015	0.190226	0.0951131	5.30024	0.119419	0.0597097	0.0107062	1.3286	1.3286	HIGH n-6/n-3 up vs Low n-6n-3
20964	17363983	NM_026487 // Atad1 // ATPase family, AAA domain containing 1 // 19|19 C3 // 67979 /// X	Atad1	NM_026487		0.0450962	7.98863	0.273968	0.136984	7.53419	0.233883	0.116942	0.0450962	1.37025	1.37025	HIGH n-6/n-3 up vs Low n-6n-3																							0	0	0
20986	17364187	ENSMUST00000157158 // Gm23170 // predicted gene, 23170 // --- // ---	Gm23170	ENSMUST00000157158		0.0175109	2.77201	0.236133	0.118066	3.52	0.395457	0.197728	0.0175109	0.595431	-1.67946	HIGH n-6/n-3 down vs Low n-6n-3
21026	17364762	NM_001164561 // Exosc1 // exosome component 1 // 19|19 D1 // 66583 /// NM_025644 // Exo	Exosc1	NM_001164561		0.0393734	6.15299	0.176501	0.0882503	5.78823	0.214806	0.107403	0.0393734	1.28767	1.28767	HIGH n-6/n-3 up vs Low n-6n-3
21047	17365001	NM_001001446 // Cyp2c44 // cytochrome P450, family 2, subfamily c, polypeptide 44 // 19	Cyp2c44	NM_001001446		0.0333258	2.12432	0.0761455	0.0380728	2.40281	0.187744	0.0938719	0.0333258	0.824451	-1.21293	HIGH n-6/n-3 down vs Low n-6n-3
21092	17365456	NM_023211 // Usmg5 // upregulated during skeletal muscle growth 5 // 19|19 D2 // 66477	Usmg5	NM_023211		0.0490521	9.34503	0.38935	0.194675	8.65694	0.401371	0.200685	0.0490521	1.61114	1.61114	HIGH n-6/n-3 up vs Low n-6n-3
21114	17365714	NM_026532 // Nutf2 // nuclear transport factor 2 // 8 D3|8 53.05 cM // 68051 /// NR_033	Nutf2	NM_026532		0.0242344	8.08173	0.215367	0.107684	7.48319	0.337066	0.168533	0.0242344	1.51418	1.51418	HIGH n-6/n-3 up vs Low n-6n-3
21184	17366451	NM_001177843 // Frmd4a // FERM domain containing 4A // 2 A1|2 // 209630 /// NM_172475 /	Frmd4a	NM_001177843		0.000274111	4.97056	0.0925681	0.0462841	4.51082	0.078394	0.039197	0.000274111	1.37529	1.37529	HIGH n-6/n-3 up vs Low n-6n-3																							0	0	0
21192	17366542	ENSMUST00000026927 // Nudt5 // nudix (nucleoside diphosphate linked moiety X)-type moti	Nudt5	ENSMUST00000026927		0.0490018	4.46115	0.103335	0.0516675	4.18439	0.199698	0.0998492	0.0490018	1.21147	1.21147	HIGH n-6/n-3 up vs Low n-6n-3
21228	17366754	NR_030470 // Mir669a-2 // microRNA 669a-2 // 2|2 // 735258 /// NR_035408 // Mir669a-1 /	Mir669a-2	NR_030470		0.0190608	2.16459	0.189678	0.0948391	2.58163	0.181088	0.0905439	0.0190608	0.748957	-1.33519	HIGH n-6/n-3 down vs Low n-6n-3																							0	0	0
21234	17366766	NR_030470 // Mir669a-2 // microRNA 669a-2 // 2|2 // 735258 /// NR_035408 // Mir669a-1 /	Mir669a-2	NR_030470		0.0190608	2.16459	0.189678	0.0948391	2.58163	0.181088	0.0905439	0.0190608	0.748957	-1.33519	HIGH n-6/n-3 down vs Low n-6n-3
21239	17366776	NR_030470 // Mir669a-2 // microRNA 669a-2 // 2|2 // 735258 /// NR_035408 // Mir669a-1 /	Mir669a-2	NR_030470		0.0190608	2.16459	0.189678	0.0948391	2.58163	0.181088	0.0905439	0.0190608	0.748957	-1.33519	HIGH n-6/n-3 down vs Low n-6n-3
21244	17366786	NR_030470 // Mir669a-2 // microRNA 669a-2 // 2|2 // 735258 /// NR_035408 // Mir669a-1 /	Mir669a-2	NR_030470		0.0190608	2.16459	0.189678	0.0948391	2.58163	0.181088	0.0905439	0.0190608	0.748957	-1.33519	HIGH n-6/n-3 down vs Low n-6n-3
21250	17366798	NR_030470 // Mir669a-2 // microRNA 669a-2 // 2|2 // 735258 /// NR_035408 // Mir669a-1 /	Mir669a-2	NR_030470		0.0190608	2.16459	0.189678	0.0948391	2.58163	0.181088	0.0905439	0.0190608	0.748957	-1.33519	HIGH n-6/n-3 down vs Low n-6n-3
21256	17366810	NR_030470 // Mir669a-2 // microRNA 669a-2 // 2|2 // 735258 /// NR_035408 // Mir669a-1 /	Mir669a-2	NR_030470		0.0195852	2.27725	0.21042	0.10521	2.73864	0.202581	0.101291	0.0195852	0.726291	-1.37686	HIGH n-6/n-3 down vs Low n-6n-3
21262	17366822	NR_030470 // Mir669a-2 // microRNA 669a-2 // 2|2 // 735258 /// NR_035408 // Mir669a-1 /	Mir669a-2	NR_030470		0.0190608	2.16459	0.189678	0.0948391	2.58163	0.181088	0.0905439	0.0190608	0.748957	-1.33519	HIGH n-6/n-3 down vs Low n-6n-3
21268	17366834	NR_030470 // Mir669a-2 // microRNA 669a-2 // 2|2 // 735258 /// NR_035408 // Mir669a-1 /	Mir669a-2	NR_030470		0.0190608	2.16459	0.189678	0.0948391	2.58163	0.181088	0.0905439	0.0190608	0.748957	-1.33519	HIGH n-6/n-3 down vs Low n-6n-3
21274	17366846	NR_030470 // Mir669a-2 // microRNA 669a-2 // 2|2 // 735258 /// NR_035408 // Mir669a-1 /	Mir669a-2	NR_030470		0.0195852	2.27725	0.21042	0.10521	2.73864	0.202581	0.101291	0.0195852	0.726291	-1.37686	HIGH n-6/n-3 down vs Low n-6n-3
21280	17366858	NR_030470 // Mir669a-2 // microRNA 669a-2 // 2|2 // 735258 /// NR_035408 // Mir669a-1 /	Mir669a-2	NR_030470		0.0190608	2.16459	0.189678	0.0948391	2.58163	0.181088	0.0905439	0.0190608	0.748957	-1.33519	HIGH n-6/n-3 down vs Low n-6n-3
21286	17366870	NR_030470 // Mir669a-2 // microRNA 669a-2 // 2|2 // 735258 /// NR_035408 // Mir669a-1 /	Mir669a-2	NR_030470		0.0190608	2.16459	0.189678	0.0948391	2.58163	0.181088	0.0905439	0.0190608	0.748957	-1.33519	HIGH n-6/n-3 down vs Low n-6n-3
21292	17366882	NR_030470 // Mir669a-2 // microRNA 669a-2 // 2|2 // 735258 /// NR_035408 // Mir669a-1 /	Mir669a-2	NR_030470		0.0190608	2.16459	0.189678	0.0948391	2.58163	0.181088	0.0905439	0.0190608	0.748957	-1.33519	HIGH n-6/n-3 down vs Low n-6n-3
21303	17366908	NR_030470 // Mir669a-2 // microRNA 669a-2 // 2|2 // 735258 /// NR_035408 // Mir669a-1 /	Mir669a-2	NR_030470		0.0190608	2.16459	0.189678	0.0948391	2.58163	0.181088	0.0905439	0.0190608	0.748957	-1.33519	HIGH n-6/n-3 down vs Low n-6n-3
21309	17366920	NR_030470 // Mir669a-2 // microRNA 669a-2 // 2|2 // 735258 /// NR_035408 // Mir669a-1 /	Mir669a-2	NR_030470		0.0190608	2.16459	0.189678	0.0948391	2.58163	0.181088	0.0905439	0.0190608	0.748957	-1.33519	HIGH n-6/n-3 down vs Low n-6n-3
21352	17367278	NM_147778 // Commd3 // COMM domain containing 3 // 2 A3|2 12.9 cM // 12238 /// ENSMUST0	Commd3	NM_147778		0.0394187	4.9193	0.143673	0.0718365	4.59654	0.199786	0.0998929	0.0394187	1.25072	1.25072	HIGH n-6/n-3 up vs Low n-6n-3
21365	17367436	NR_002688 // Gm13363 // predicted gene 13363 // 2 A3|2 // 433406	Gm13363	NR_002688		0.0410293	7.27676	0.0803504	0.0401752	6.80573	0.354269	0.177134	0.0410293	1.3861	1.3861	HIGH n-6/n-3 up vs Low n-6n-3
21398	17367807	NM_001039386 // Nsmf // NMDA receptor synaptonuclear signaling and neuronal migration f	Nsmf	NM_001039386		0.028784	3.52584	0.227366	0.113683	3.03217	0.259701	0.129851	0.028784	1.40802	1.40802	HIGH n-6/n-3 up vs Low n-6n-3
21431	17367978	NM_008721 // Npdc1 // neural proliferation, differentiation and control 1 // 2 A3|2 //	Npdc1	NM_008721		0.0283269	4.55244	0.186275	0.0931374	4.20874	0.150205	0.0751026	0.0283269	1.26901	1.26901	HIGH n-6/n-3 up vs Low n-6n-3																							0	0	0
21487	17368685	NM_001145834 // Ralgds // ral guanine nucleotide dissociation stimulator // 2 A3|2 // 1	Ralgds	NM_001145834		0.014527	6.11178	0.173135	0.0865677	5.58565	0.256722	0.128361	0.014527	1.44006	1.44006	HIGH n-6/n-3 up vs Low n-6n-3
21498	17368853	ENSMUST00000158972 // Gm24976 // predicted gene, 24976 // --- // ---	Gm24976	ENSMUST00000158972		0.0198056	2.11641	0.0372115	0.0186058	2.59313	0.300349	0.150175	0.0198056	0.718608	-1.39158	HIGH n-6/n-3 down vs Low n-6n-3
21527	17369296	NM_133673 // Tor1b // torsin family 1, member B // 2 B|2 // 30934 /// ENSMUST0000002819	Tor1b	NM_133673		0.0405909	5.44539	0.170488	0.0852438	5.07277	0.230243	0.115122	0.0405909	1.29471	1.29471	HIGH n-6/n-3 up vs Low n-6n-3
21548	17369789	NM_001252534 // Ciz1 // CDKN1A interacting zinc finger protein 1 // 2 B|2 // 68379 ///	Ciz1	NM_001252534		0.0116889	2.92878	0.0393551	0.0196776	2.62158	0.167209	0.0836047	0.0116889	1.23731	1.23731	HIGH n-6/n-3 up vs Low n-6n-3
21592	17370234	NM_001001602 // Dab2ip // disabled 2 interacting protein // 2 B|2 // 69601 /// NM_00111	Dab2ip	NM_001001602		0.0467042	4.42056	0.16396	0.08198	4.09769	0.199957	0.0999787	0.0467042	1.25082	1.25082	HIGH n-6/n-3 up vs Low n-6n-3
21596	17370285	NM_026422 // Mrrf // mitochondrial ribosome recycling factor // 2 B|2 // 67871 /// ENSM	Mrrf	NM_026422		0.0382688	6.74277	0.191891	0.0959453	6.42218	0.148081	0.0740406	0.0382688	1.24884	1.24884	HIGH n-6/n-3 up vs Low n-6n-3
21635	17370487	NM_172854 // Olfml2a // olfactomedin-like 2A // 2 B|2 // 241327 /// ENSMUST00000057279	Olfml2a	NM_172854		0.0305108	4.60182	0.147797	0.0738986	4.33426	0.119437	0.0597187	0.0305108	1.20377	1.20377	HIGH n-6/n-3 up vs Low n-6n-3
21644	17370573	ENSMUST00000157499 // Gm22867 // predicted gene, 22867 // --- // ---	Gm22867	ENSMUST00000157499		0.0475572	2.95534	0.228074	0.114037	2.63567	0.119309	0.0596547	0.0475572	1.24804	1.24804	HIGH n-6/n-3 up vs Low n-6n-3
21739	17371661	NM_027352 // Gorasp2 // golgi reassembly stacking protein 2 // 2 C2|2 // 70231 /// NR_0	Gorasp2	NM_027352		0.0287775	5.96799	0.139955	0.0699774	5.6384	0.18306	0.0915302	0.0287775	1.25666	1.25666	HIGH n-6/n-3 up vs Low n-6n-3
21744	17371739	NM_026115 // Hat1 // histone aminotransferase 1 // 2 C2|2 // 107435 /// ENSMUST00000028	Hat1	NM_026115		0.00638982	6.20726	0.176765	0.0883827	5.76891	0.120745	0.0603724	0.00638982	1.35506	1.35506	HIGH n-6/n-3 up vs Low n-6n-3
21778	17372052	ENSMUST00000136302 // Hoxd11 // homeobox D11 // 2 C3|2 44.13 cM // 15431	Hoxd11	ENSMUST00000136302		0.0212584	3.40224	0.289137	0.144568	4.15035	0.387483	0.193741	0.0212584	0.595383	-1.67959	HIGH n-6/n-3 down vs Low n-6n-3
21809	17372294	ENSMUST00000028398 // Ube2e3 // ubiquitin-conjugating enzyme E2E 3 // 2|2 D // 22193 //	Ube2e3	ENSMUST00000028398		0.000742638	5.87698	0.0659554	0.0329777	5.59648	0.0597319	0.0298659	0.000742638	1.21462	1.21462	HIGH n-6/n-3 up vs Low n-6n-3
21817	17372392	NM_024181 // Dnajc10 // DnaJ (Hsp40) homolog, subfamily C, member 10 // 2|2 D // 66861	Dnajc10	NM_024181		0.0362918	6.93695	0.204336	0.102168	6.5447	0.208839	0.10442	0.0362918	1.31244	1.31244	HIGH n-6/n-3 up vs Low n-6n-3																							0	0	0
21827	17372515	NM_008402 // Itgav // integrin alpha V // 2 D|2 49.33 cM // 16410 /// ENSMUST0000002849	Itgav	NM_008402		0.00107234	6.63916	0.0731804	0.0365902	6.24153	0.113749	0.0568745	0.00107234	1.31735	1.31735	HIGH n-6/n-3 up vs Low n-6n-3
21828	17372552	NM_175514 // Fam171b // family with sequence similarity 171, member B // 2 D|2 // 24152	Fam171b	NM_175514		0.00560252	3.97728	0.211385	0.105693	3.43327	0.148329	0.0741643	0.00560252	1.45802	1.45802	HIGH n-6/n-3 up vs Low n-6n-3
21847	17372725	NM_011784 // Aplnr // apelin receptor // 2|2 E1 // 23796 /// ENSMUST00000057019 // Apln	Aplnr	NM_011784		0.0143809	7.16254	0.144229	0.0721143	6.83331	0.128694	0.0643472	0.0143809	1.25634	1.25634	HIGH n-6/n-3 up vs Low n-6n-3
21887	17372842	BC119331 // Olfr1122 // olfactory receptor 1122 // 2 E1|2 // 259033	Olfr1122	BC119331		0.0392004	2.34022	0.164611	0.0823057	2.66498	0.184442	0.092221	0.0392004	0.798433	-1.25245	HIGH n-6/n-3 down vs Low n-6n-3
21889	17372848	NM_147028 // Olfr1124 // olfactory receptor 1124 // 2 E1|2 // 259030 /// ENSMUST0000006	Olfr1124	NM_147028		0.0270479	2.10326	0.210394	0.105197	2.45898	0.124835	0.0624174	0.0270479	0.78148	-1.27962	HIGH n-6/n-3 down vs Low n-6n-3
21946	17373222	NM_007387 // Acp2 // acid phosphatase 2, lysosomal // 2 E1|2 50.54 cM // 11432 /// ENSM	Acp2	NM_007387		0.0111617	5.90095	0.195853	0.0979263	5.38657	0.206448	0.103224	0.0111617	1.42838	1.42838	HIGH n-6/n-3 up vs Low n-6n-3
21951	17373328	NM_001165989 // Ckap5 // cytoskeleton associated protein 5 // 2 E1|2 // 75786 /// NM_02	Ckap5	NM_001165989		0.0079392	5.36013	0.133413	0.0667063	5.05912	0.0772673	0.0386336	0.0079392	1.23201	1.23201	HIGH n-6/n-3 up vs Low n-6n-3
21968	17373550	NM_001025246 // Trp53i11 // transformation related protein 53 inducible protein 11 // 2	Trp53i11	NM_001025246		0.00936604	7.86435	0.168404	0.0842019	7.34849	0.216372	0.108186	0.00936604	1.42986	1.42986	HIGH n-6/n-3 up vs Low n-6n-3
21991	17373721	NM_019735 // Apip // APAF1 interacting protein // 2|2 E3 // 56369 /// ENSMUST0000001105	Apip	NM_019735		0.0323163	5.28352	0.336783	0.168391	4.78289	0.130391	0.0651953	0.0323163	1.41483	1.41483	HIGH n-6/n-3 up vs Low n-6n-3																							0	0	0
22005	17373842	ENSMUST00000158075 // Gm25554 // predicted gene, 25554 // --- // ---	Gm25554	ENSMUST00000158075		0.00899615	2.74234	0.135125	0.0675626	2.44977	0.0740608	0.0370304	0.00899615	1.22481	1.22481	HIGH n-6/n-3 up vs Low n-6n-3
22026	17374058	NM_139303 // Kif18a // kinesin family member 18A // 2 E3|2 // 228421 /// ENSMUST0000002	Kif18a	NM_139303		0.00607401	3.54448	0.153455	0.0767273	3.19078	0.0750996	0.0375498	0.00607401	1.27784	1.27784	HIGH n-6/n-3 up vs Low n-6n-3
22056	17374283	NM_024254 // Katnbl1 // katanin p80 subunit B like 1 // 2|2 E4 // 72425 /// ENSMUST0000	Katnbl1	NM_024254		0.025485	5.13201	0.0570871	0.0285436	4.75333	0.24996	0.12498	0.025485	1.30015	1.30015	HIGH n-6/n-3 up vs Low n-6n-3																							0	0	0
22089	17374632	XR_374487 // Knstrn // kinetochore-localized astrin/SPAG5 binding // 2 E5|2 // 51944 //	Knstrn	XR_374487		0.0230611	4.1424	0.169352	0.0846761	3.78826	0.160984	0.080492	0.0230611	1.27822	1.27822	HIGH n-6/n-3 up vs Low n-6n-3
22095	17374692	NM_029617 // Casc5 // cancer susceptibility candidate 5 // 2 E5|2 // 76464 /// ENSMUST0	Casc5	NM_029617		0.0227299	4.01995	0.214663	0.107331	3.54453	0.227136	0.113568	0.0227299	1.39033	1.39033	HIGH n-6/n-3 up vs Low n-6n-3
22127	17375220	NM_001290824 // Tubgcp4 // tubulin, gamma complex associated protein 4 // 2 F1|2 60.37	Tubgcp4	NM_001290824		0.0460499	5.41355	0.153266	0.0766331	5.14457	0.150108	0.0750542	0.0460499	1.20496	1.20496	HIGH n-6/n-3 up vs Low n-6n-3
22155	17375641	NM_001159646 // Dut // deoxyuridine triphosphatase // 2 F1|2 61.33 cM // 110074 /// NM_	Dut	NM_001159646		0.00128283	4.85092	0.134258	0.0671292	4.27456	0.152166	0.0760828	0.00128283	1.49108	1.49108	HIGH n-6/n-3 up vs Low n-6n-3
22159	17375661	NM_025613 // Eid1 // EP300 interacting inhibitor of differentiation 1 // 2 F1|2 // 5852	Eid1	NM_025613		0.00840183	4.62444	0.180854	0.0904269	4.18521	0.138545	0.0692724	0.00840183	1.35588	1.35588	HIGH n-6/n-3 up vs Low n-6n-3
22160	17375665	NM_001291002 // Galk2 // galactokinase 2 // 2 F1|2 // 69976 /// NM_175154 // Galk2 // g	Galk2	NM_001291002		0.0348637	4.35922	0.234769	0.117384	3.98471	0.144843	0.0724214	0.0348637	1.29639	1.29639	HIGH n-6/n-3 up vs Low n-6n-3
22189	17376084	NM_027192 // Ttl // tubulin tyrosine ligase // 2|2 F3 // 69737 /// ENSMUST00000035812 /	Ttl	NM_027192		0.00293225	3.94553	0.124422	0.0622108	3.54752	0.108461	0.0542306	0.00293225	1.31769	1.31769	HIGH n-6/n-3 up vs Low n-6n-3
22333	17377538	ENSMUST00000157819 // Gm22187 // predicted gene, 22187 // --- // ---	Gm22187	ENSMUST00000157819		0.0160645	2.23796	0.0564713	0.0282356	2.54329	0.175221	0.0876104	0.0160645	0.809262	-1.23569	HIGH n-6/n-3 down vs Low n-6n-3
22353	17377691	NM_024196 // Tbc1d20 // TBC1 domain family, member 20 // 2|2 H1 // 67231 /// ENSMUST000	Tbc1d20	NM_024196		0.03628	7.1825	0.157732	0.0788659	6.90808	0.129985	0.0649923	0.03628	1.20951	1.20951	HIGH n-6/n-3 up vs Low n-6n-3
22366	17377793	NM_001141975 // Tpx2 // TPX2, microtubule-associated protein homolog (Xenopus laevis) /	Tpx2	NM_001141975		0.0108427	4.99437	0.159139	0.0795694	4.57433	0.167206	0.083603	0.0108427	1.33797	1.33797	HIGH n-6/n-3 up vs Low n-6n-3
22458	17378721	NM_001025395 // Src // Rous sarcoma oncogene // 2 H1|2 78.35 cM // 20779 /// NM_009271	Src	NM_001025395		0.035931	4.79396	0.0809341	0.040467	4.50021	0.202632	0.101316	0.035931	1.22582	1.22582	HIGH n-6/n-3 up vs Low n-6n-3
22478	17378958	NM_027975 // Fam83d // family with sequence similarity 83, member D // 2 H1|2 // 71878	Fam83d	NM_027975		0.00247006	3.76858	0.149001	0.0745003	3.2856	0.123407	0.0617034	0.00247006	1.39762	1.39762	HIGH n-6/n-3 up vs Low n-6n-3
22502	17379258	NR_028122 // 2310001K24Rik // RIKEN cDNA 2310001K24 gene // 2 H3|2 // 69517 /// ENSMUST	2310001K24Rik	NR_028122		0.00667577	2.31019	0.137909	0.0689543	2.63556	0.0819395	0.0409697	0.00667577	0.798092	-1.25299	HIGH n-6/n-3 down vs Low n-6n-3
22571	17379922	NM_011427 // Snai1 // snail family zinc finger 1 // 2 H3|2 87.33 cM // 20613 /// ENSMUS	Snai1	NM_011427		0.0115062	2.35021	0.149416	0.0747082	2.06627	0.0519491	0.0259746	0.0115062	1.21751	1.21751	HIGH n-6/n-3 up vs Low n-6n-3
22611	17380185	NM_175112 // Rae1 // RAE1 RNA export 1 homolog (S. pombe) // 2 H3|2 95.66 cM // 66679 /	Rae1	NM_175112		0.0340026	7.53891	0.130791	0.0653957	7.20453	0.206698	0.103349	0.0340026	1.26083	1.26083	HIGH n-6/n-3 up vs Low n-6n-3
22662	17380666	NM_177727 // Lsm14b // LSM14 homolog B (SCD6, S. cerevisiae) // 2 H4|2 // 241846 /// EN	Lsm14b	NM_177727		0.00900601	4.56512	0.253516	0.126758	4.04665	0.101666	0.0508328	0.00900601	1.43244	1.43244	HIGH n-6/n-3 up vs Low n-6n-3
22699	17381056	ENSMUST00000130261 // Tpd52l2 // tumor protein D52-like 2 // 2 H4|2 // 66314 /// ENSMUS	Tpd52l2	ENSMUST00000130261		0.0428098	2.83231	0.161708	0.0808541	2.56802	0.128167	0.0640834	0.0428098	1.20105	1.20105	HIGH n-6/n-3 up vs Low n-6n-3
22795	17382104	NM_001081364 // Arhgap21 // Rho GTPase activating protein 21 // 2 A3|2 // 71435 /// NM_	Arhgap21	NM_001081364		0.0481714	5.87581	0.129513	0.0647567	5.42457	0.340965	0.170482	0.0481714	1.36722	1.36722	HIGH n-6/n-3 up vs Low n-6n-3
22813	17382357	ENSMUST00000083864 // Gm25518 // predicted gene, 25518 // --- // ---	Gm25518	ENSMUST00000083864		0.00890018	2.54485	0.111724	0.0558621	3.27067	0.364628	0.182314	0.00890018	0.604654	-1.65384	HIGH n-6/n-3 down vs Low n-6n-3
22819	17382392	NM_021393 // Nelfb // negative elongation factor complex member B, Cobra1 // 2 A3|2 //	Nelfb	NM_021393		0.0472563	6.2784	0.17635	0.0881751	5.96407	0.180885	0.0904427	0.0472563	1.24344	1.24344	HIGH n-6/n-3 up vs Low n-6n-3
22840	17382709	NM_029859 // Ccdc183 // coiled-coil domain containing 183 // 2 A3|2 // 77058 /// ENSMUS	Ccdc183	NM_029859		0.00917332	2.20854	0.116081	0.0580403	2.57278	0.153798	0.076899	0.00917332	0.776877	-1.28721	HIGH n-6/n-3 down vs Low n-6n-3
22921	17383723	NM_144884 // Tor1a // torsin family 1, member A (torsin A) // 2 B|2 // 30931 /// ENSMUS	Tor1a	NM_144884		0.0425577	4.5145	0.253033	0.126516	4.14109	0.143782	0.0718912	0.0425577	1.29541	1.29541	HIGH n-6/n-3 up vs Low n-6n-3
22973	17384441	NM_026697 // Rab14 // RAB14, member RAS oncogene family // 2 B|2 // 68365 /// ENSMUST00	Rab14	NM_026697		0.0285863	5.87834	0.0926812	0.0463406	5.55534	0.205489	0.102744	0.0285863	1.25093	1.25093	HIGH n-6/n-3 up vs Low n-6n-3
22993	17384502	NR_045894 // Gm13446 // predicted gene 13446 // 2 B|2 // 100042194 /// ENSMUST000001346	Gm13446	NR_045894		0.00934353	2.71002	0.244046	0.122023	3.17144	0.0228026	0.0114013	0.00934353	0.726273	-1.37689	HIGH n-6/n-3 down vs Low n-6n-3
23034	17384994	NM_011958 // Orc4 // origin recognition complex, subunit 4 // 2 C1.1|2 // 26428 /// NR_	Orc4	NM_011958		0.0204993	5.53822	0.0741565	0.0370783	5.22535	0.186119	0.0930593	0.0204993	1.24218	1.24218	HIGH n-6/n-3 up vs Low n-6n-3
23127	17386465	NM_001018042 // Sp3 // trans-acting transcription factor 3 // 2 C3|2 // 20687 /// NM_00	Sp3	NM_001018042		0.0278165	5.68488	0.167587	0.0837937	5.33135	0.178641	0.0893207	0.0278165	1.27768	1.27768	HIGH n-6/n-3 up vs Low n-6n-3
23222	17387652	NM_147012 // Olfr1047 // olfactory receptor 1047 // 2 E1|2 // 259014 /// ENSMUST0000009	Olfr1047	NM_147012		0.0107228	3.28911	0.369397	0.184698	4.44501	0.51477	0.257385	0.0107228	0.448786	-2.22823	HIGH n-6/n-3 down vs Low n-6n-3
23375	17388389	NM_009963 // Cry2 // cryptochrome 2 (photolyase-like) // 2|2 E // 12953 /// ENSMUST0000	Cry2	NM_009963		0.00886836	5.34625	0.0589567	0.0294783	5.07029	0.132342	0.0661711	0.00886836	1.2108	1.2108	HIGH n-6/n-3 up vs Low n-6n-3
23388	17388573	NM_019657 // Hsd17b12 // hydroxysteroid (17-beta) dehydrogenase 12 // 2 E1|2 // 56348 /	Hsd17b12	NM_019657		0.00404251	7.62788	0.0903568	0.0451784	7.34814	0.0848298	0.0424149	0.00404251	1.21397	1.21397	HIGH n-6/n-3 up vs Low n-6n-3
23429	17389009	NM_145380 // Eif3m // eukaryotic translation initiation factor 3, subunit M // 2 E2|2 5	Eif3m	NM_145380		0.0287088	7.49573	0.0857886	0.0428943	7.15509	0.222009	0.111004	0.0287088	1.26632	1.26632	HIGH n-6/n-3 up vs Low n-6n-3
23511	17389736	NM_001081971 // Ankrd63 // ankyrin repeat domain 63 // 2 E5|2 // 383787 /// ENSMUST0000	Ankrd63	NM_001081971		0.00137544	2.30023	0.082069	0.0410345	2.66021	0.0988353	0.0494177	0.00137544	0.779174	-1.28341	HIGH n-6/n-3 down vs Low n-6n-3
23528	17389936	ENSMUST00000082788 // Gm25857 // predicted gene, 25857 // --- // ---	Gm25857	ENSMUST00000082788		0.00793154	2.02533	0.139533	0.0697663	2.54742	0.228048	0.114024	0.00793154	0.696361	-1.43604	HIGH n-6/n-3 down vs Low n-6n-3
23530	17389962	NM_001163701 // Rpap1 // RNA polymerase II associated protein 1 // 2 E5|2 // 68925 ///	Rpap1	NM_001163701		0.0162301	3.35723	0.028515	0.0142575	3.07625	0.167431	0.0837155	0.0162301	1.21502	1.21502	HIGH n-6/n-3 up vs Low n-6n-3
23575	17390823	NM_001290993 // Slc30a4 // solute carrier family 30 (zinc transporter), member 4 // 2 E	Slc30a4	NM_001290993		0.0296335	5.6858	0.129527	0.0647636	5.28355	0.252117	0.126059	0.0296335	1.32157	1.32157	HIGH n-6/n-3 up vs Low n-6n-3
23599	17391212	NM_144818 // Ncaph // non-SMC condensin I complex, subunit H // 2 F1|2 // 215387 /// EN	Ncaph	NM_144818		0.018275	4.6194	0.109455	0.0547276	4.11064	0.297068	0.148534	0.018275	1.42283	1.42283	HIGH n-6/n-3 up vs Low n-6n-3
23675	17391506	ENSMUST00000099385 // Gm10762 // predicted gene 10762 // --- // ---	Gm10762	ENSMUST00000099385		0.0276018	4.97785	0.210766	0.105383	4.66584	0.0460414	0.0230207	0.0276018	1.24144	1.24144	HIGH n-6/n-3 up vs Low n-6n-3
23691	17391608	NM_130884 // Idh3b // isocitrate dehydrogenase 3 (NAD+) beta // 2|2 F3 // 170718 /// XM	Idh3b	NM_130884		0.0280177	9.45918	0.277727	0.138864	9.01576	0.132726	0.0663629	0.0280177	1.35982	1.35982	HIGH n-6/n-3 up vs Low n-6n-3
23720	17391971	ENSMUST00000028817 // Pcna // proliferating cell nuclear antigen // 2 F2|2 64.15 cM //	Pcna	ENSMUST00000028817		0.0203721	7.33395	0.169173	0.0845867	6.9076	0.213746	0.106873	0.0203721	1.34384	1.34384	HIGH n-6/n-3 up vs Low n-6n-3
23730	17392087	NM_029148 // Tmx4 // thioredoxin-related transmembrane protein 4 // 2 G1|2 65.66 cM //	Tmx4	NM_029148		0.0165463	3.12377	0.12494	0.0624701	2.82612	0.130641	0.0653204	0.0165463	1.22915	1.22915	HIGH n-6/n-3 up vs Low n-6n-3
23763	17392452	ENSMUST00000001818 // Crnkl1 // Crn, crooked neck-like 1 (Drosophila) // 2 G1|2 // 6687	Crnkl1	ENSMUST00000001818		0.0303078	4.13614	0.128006	0.0640032	3.776	0.220909	0.110454	0.0303078	1.28355	1.28355	HIGH n-6/n-3 up vs Low n-6n-3
23845	17393092	ENSMUST00000124988 // 7530422B04Rik // RIKEN cDNA 7530422B04 gene // --- // --- /// AK0	7530422B04Rik	ENSMUST00000124988		0.0214881	2.28329	0.0531965	0.0265982	2.55191	0.165748	0.0828739	0.0214881	0.830109	-1.20466	HIGH n-6/n-3 down vs Low n-6n-3
23855	17393207	NM_016661 // Ahcy // S-adenosylhomocysteine hydrolase // 2 H1|2 76.94 cM // 269378 ///	Ahcy	NM_016661		0.0421384	1.93807	0.192952	0.0964758	2.21162	0.089248	0.044624	0.0421384	0.827282	-1.20878	HIGH n-6/n-3 down vs Low n-6n-3
23866	17393351	ENSMUST00000166589 // Gm17581 // predicted gene, 17581 // --- // ---	Gm17581	ENSMUST00000166589		0.0285616	3.02844	0.246857	0.123429	2.62833	0.130386	0.0651929	0.0285616	1.31961	1.31961	HIGH n-6/n-3 up vs Low n-6n-3
23891	17393592	NM_013865 // Ndrg3 // N-myc downstream regulated gene 3 // 2 H1|2 // 29812 /// NM_18095	Ndrg3	NM_013865		0.0340695	7.02164	0.151122	0.0755609	6.74412	0.135723	0.0678613	0.0340695	1.21211	1.21211	HIGH n-6/n-3 up vs Low n-6n-3
23936	17394047	NM_012032 // Serinc3 // serine incorporator 3 // 2 H3|2 // 26943 /// XM_006499616 // Se	Serinc3	NM_012032		0.0323589	9.85145	0.129872	0.064936	8.94015	0.644673	0.322337	0.0323589	1.88074	1.88074	HIGH n-6/n-3 up vs Low n-6n-3
23974	17394385	NM_001252573 // Slc35c2 // solute carrier family 35, member C2 // 2 H3|2 85.53 cM // 22	Slc35c2	NM_001252573		0.00646706	5.0337	0.0586079	0.0293039	4.59962	0.204298	0.102149	0.00646706	1.35106	1.35106	HIGH n-6/n-3 up vs Low n-6n-3
23975	17394405	NM_080287 // Elmo2 // engulfment and cell motility 2 // 2 H3|2 // 140579 /// NM_207705	Elmo2	NM_080287		0.0135992	5.36131	0.112437	0.0562183	4.97174	0.19571	0.097855	0.0135992	1.31001	1.31001	HIGH n-6/n-3 up vs Low n-6n-3
24081	17395379	ENSMUST00000108959 // Gm14412 // predicted gene 14412 // --- // ---	Gm14412	ENSMUST00000108959		0.019585	4.69284	0.199329	0.0996647	4.03663	0.364484	0.182242	0.019585	1.57594	1.57594	HIGH n-6/n-3 up vs Low n-6n-3
24124	17395928	NM_009236 // Sox18 // SRY (sex determining region Y)-box 18 // 2 H4|2 103.71 cM // 2067	Sox18	NM_009236		0.00982052	5.52573	0.309083	0.154541	4.85034	0.190065	0.0950324	0.00982052	1.59703	1.59703	HIGH n-6/n-3 up vs Low n-6n-3
24128	17395969	ENSMUST00000104639 // Gm23237 // predicted gene, 23237 // --- // ---	Gm23237	ENSMUST00000104639		0.0128816	2.2738	0.055013	0.0275065	2.6383	0.20111	0.100555	0.0128816	0.776736	-1.28744	HIGH n-6/n-3 down vs Low n-6n-3
24134	17396001	ENSMUST00000158595 // Gm22074 // predicted gene, 22074 // --- // ---	Gm22074	ENSMUST00000158595		0.025788	2.04473	0.145392	0.0726958	2.3757	0.171428	0.085714	0.025788	0.795006	-1.25785	HIGH n-6/n-3 down vs Low n-6n-3
24183	17396363	ENSMUST00000157117 // Gm25152 // predicted gene, 25152 // --- // ---	Gm25152	ENSMUST00000157117		0.041121	2.39342	0.11037	0.0551849	2.88439	0.362459	0.181229	0.041121	0.711544	-1.40539	HIGH n-6/n-3 down vs Low n-6n-3
24189	17396403	NM_001164056 // Pld1 // phospholipase D1 // 3 A3|3 11.15 cM // 18805 /// NM_008875 // P	Pld1	NM_001164056		0.0183451	3.77487	0.0745584	0.0372792	3.48576	0.163922	0.0819608	0.0183451	1.22189	1.22189	HIGH n-6/n-3 up vs Low n-6n-3
24211	17396702	NM_001161818 // Zfp639 // zinc finger protein 639 // 3|3 B // 67778 /// NM_144519 // Zf	Zfp639	NM_001161818		0.0152275	5.0098	0.176611	0.0883056	4.56631	0.196185	0.0980924	0.0152275	1.35988	1.35988	HIGH n-6/n-3 up vs Low n-6n-3
24214	17396750	NM_025316 // Ndufb5 // NADH dehydrogenase (ubiquinone) 1 beta subcomplex, 5 // 3 A3|3 /	Ndufb5	NM_025316		0.0412987	6.5657	0.110538	0.0552692	6.2067	0.25441	0.127205	0.0412987	1.28254	1.28254	HIGH n-6/n-3 up vs Low n-6n-3																							0	0	0
24269	17397426	NM_009834 // Ccrn4l // CCR4 carbon catabolite repression 4-like (S. cerevisiae) // 3|3	Ccrn4l	NM_009834		0.0449917	3.67721	0.2493	0.12465	3.31166	0.147286	0.0736431	0.0449917	1.28837	1.28837	HIGH n-6/n-3 up vs Low n-6n-3																							0	0	0
24273	17397462	NM_016858 // Rab33b // RAB33B, member RAS oncogene family // 3|3 D // 19338 /// ENSMUST	Rab33b	NM_016858		0.0415055	5.51689	0.269013	0.134507	5.13226	0.127319	0.0636594	0.0415055	1.30553	1.30553	HIGH n-6/n-3 up vs Low n-6n-3
24308	17397783	NM_001005509 // Eif2a // eukaryotic translation initiation factor 2A // 3 D|3 28.58 cM	Eif2a	NM_001005509		0.0201764	6.3447	0.206642	0.103321	5.96609	0.124953	0.0624763	0.0201764	1.30009	1.30009	HIGH n-6/n-3 up vs Low n-6n-3
24327	17397962	NM_028712 // Rap2b // RAP2B, member of RAS oncogene family // 3 E1|3 // 74012 /// ENSMU	Rap2b	NM_028712		0.030555	4.19858	0.221984	0.110992	3.86522	0.0825865	0.0412933	0.030555	1.25995	1.25995	HIGH n-6/n-3 up vs Low n-6n-3
24378	17398428	ENSMUST00000158819 // Gm22531 // predicted gene, 22531 // --- // ---	Gm22531	ENSMUST00000158819		0.0453471	2.92244	0.165354	0.082677	3.23159	0.181405	0.0907024	0.0453471	0.807113	-1.23898	HIGH n-6/n-3 down vs Low n-6n-3
24440	17399176	NR_028359 // 5830417I10Rik // gon-4-like pseudogene // 3 F1|3 // 100302730	5830417I10Rik	NR_028359		0.024188	3.37841	0.200747	0.100374	3.04568	0.0953562	0.0476781	0.024188	1.25939	1.25939	HIGH n-6/n-3 up vs Low n-6n-3
24449	17399333	NM_001077411 // Gba // glucosidase, beta, acid // 3 F1|3 39.01 cM // 14466 /// NM_00809	Gba	NM_001077411		0.042746	6.6493	0.199	0.0995002	6.22203	0.267543	0.133771	0.042746	1.34469	1.34469	HIGH n-6/n-3 up vs Low n-6n-3
24450	17399347	NM_013691 // Thbs3 // thrombospondin 3 // 3 E3-F1|3 39.01 cM // 21827 /// ENSMUST000000	Thbs3	NM_013691		0.0499499	6.45404	0.239111	0.119556	5.50032	0.741705	0.370852	0.0499499	1.93686	1.93686	HIGH n-6/n-3 up vs Low n-6n-3
24452	17399386	ENSMUST00000040888 // Krtcap2 // keratinocyte associated protein 2 // 3|3 F2 // 66059 /	Krtcap2	ENSMUST00000040888		0.0442096	6.23849	0.296881	0.148441	5.63447	0.372092	0.186046	0.0442096	1.51995	1.51995	HIGH n-6/n-3 up vs Low n-6n-3
24495	17399823	NM_013650 // S100a8 // S100 calcium binding protein A8 (calgranulin A) // 3 F1-F2|3 39.	S100a8	NM_013650		0.0326386	3.07479	0.228558	0.114279	2.51805	0.331565	0.165782	0.0326386	1.47094	1.47094	HIGH n-6/n-3 up vs Low n-6n-3
24549	17400198	NM_001293715 // Pi4kb // phosphatidylinositol 4-kinase, catalytic, beta polypeptide //	Pi4kb	NM_001293715		0.0209798	4.91677	0.0847385	0.0423692	4.59531	0.188915	0.0944573	0.0209798	1.24959	1.24959	HIGH n-6/n-3 up vs Low n-6n-3																							0	0	0
24582	17400555	ENSMUST00000090779 // Hist2h3c1 // histone cluster 2, H3c1 // 3|3 F1-F2 // 15077 /// EN	Hist2h3c1	ENSMUST00000090779		0.0472178	6.28362	0.0722526	0.0361263	5.77933	0.398706	0.199353	0.0472178	1.41843	1.41843	HIGH n-6/n-3 up vs Low n-6n-3
24589	17400586	ENSMUST00000083374 // Gm24136 // predicted gene, 24136 // --- // ---	Gm24136	ENSMUST00000083374		0.0184867	1.95505	0.0731697	0.0365848	2.27322	0.184583	0.0922913	0.0184867	0.802086	-1.24675	HIGH n-6/n-3 down vs Low n-6n-3
24661	17401308	NM_001163467 // Phtf1 // putative homeodomain transcription factor 1 // 3 F2.2|3 // 186	Phtf1	NM_001163467		0.0196668	4.81739	0.126209	0.0631046	4.48754	0.166635	0.0833177	0.0196668	1.25688	1.25688	HIGH n-6/n-3 up vs Low n-6n-3
24676	17401463	NM_001099674 // 1810022K09Rik // RIKEN cDNA 1810022K09 gene // 3 A1|3 // 69126 /// XM_0	1810022K09Rik	NM_001099674		0.0198523	7.35702	0.267207	0.133604	6.85988	0.168295	0.0841476	0.0198523	1.41141	1.41141	HIGH n-6/n-3 up vs Low n-6n-3
24701	17401650	NM_001004293 // Amigo1 // adhesion molecule with Ig like domain 1 // 3 F2.3|3 // 229715	Amigo1	NM_001004293		0.0176408	3.30961	0.0700446	0.0350223	3.02726	0.159474	0.079737	0.0176408	1.21617	1.21617	HIGH n-6/n-3 up vs Low n-6n-3
24738	17402097	ENSMUST00000174925 // Gm22408 // predicted gene, 22408 // --- // ---	Gm22408	ENSMUST00000174925		0.0427559	2.64347	0.288257	0.144128	2.26543	0.0628804	0.0314402	0.0427559	1.29957	1.29957	HIGH n-6/n-3 up vs Low n-6n-3
24751	17402181	NM_010171 // F3 // coagulation factor III // 3 G1|3 52.94 cM // 14066 /// ENSMUST000000	F3	NM_010171		0.0138808	5.8341	0.173626	0.086813	5.30886	0.251722	0.125861	0.0138808	1.43918	1.43918	HIGH n-6/n-3 up vs Low n-6n-3
24754	17402283	NM_008129 // Gclm // glutamate-cysteine ligase, modifier subunit // 3 H1-3|3 52.94 cM /	Gclm	NM_008129		0.0448005	6.31039	0.123998	0.0619988	5.95068	0.256152	0.128076	0.0448005	1.28317	1.28317	HIGH n-6/n-3 up vs Low n-6n-3
24790	17402588	NM_001286948 // Pla2g12a // phospholipase A2, group XIIA // 3 H1|3 // 66350 /// NM_0231	Pla2g12a	NM_001286948		0.0233843	4.55679	0.228644	0.114322	4.09738	0.200645	0.100323	0.0233843	1.37497	1.37497	HIGH n-6/n-3 up vs Low n-6n-3
24807	17402756	NM_001293641 // Ppa2 // pyrophosphatase (inorganic) 2 // 3 G3|3 // 74776 /// NM_146141	Ppa2	NM_001293641		0.00699216	4.04321	0.0884159	0.0442079	3.7429	0.120632	0.0603159	0.00699216	1.23141	1.23141	HIGH n-6/n-3 up vs Low n-6n-3
24815	17402895	NM_025356 // Ube2d3 // ubiquitin-conjugating enzyme E2D 3 // 3 G3|3 // 66105 /// XM_006	Ube2d3	NM_025356		0.0314831	8.22506	0.182719	0.0913593	7.73254	0.301761	0.150881	0.0314831	1.40689	1.40689	HIGH n-6/n-3 up vs Low n-6n-3
24816	17402905	NM_027288 // Manba // mannosidase, beta A, lysosomal // 3 H2|3 62.65 cM // 110173 /// E	Manba	NM_027288		0.0331442	4.65427	0.217911	0.108956	4.26473	0.180496	0.0902482	0.0331442	1.30998	1.30998	HIGH n-6/n-3 up vs Low n-6n-3
24837	17403126	NM_001288578 // Adh5 // alcohol dehydrogenase 5 (class III), chi polypeptide // 3 G3|3	Adh5	NM_001288578		0.0380884	7.23667	0.213839	0.10692	6.79789	0.253049	0.126525	0.0380884	1.35546	1.35546	HIGH n-6/n-3 up vs Low n-6n-3
24845	17403237	NM_001289492 // Gbp3 // guanylate binding protein 3 // 3 H1|3 // 55932 /// NM_001289493	Gbp3	NM_001289492		0.0133832	4.70998	0.229543	0.114771	4.19488	0.188947	0.0944736	0.0133832	1.42909	1.42909	HIGH n-6/n-3 up vs Low n-6n-3
24847	17403268	NM_010260 // Gbp2 // guanylate binding protein 2 // 3 H1|3 66.69 cM // 14469 /// ENSMUS	Gbp2	NM_010260		0.0119834	4.91036	0.0876631	0.0438316	4.50676	0.209382	0.104691	0.0119834	1.32281	1.32281	HIGH n-6/n-3 up vs Low n-6n-3
24869	17403533	NM_001293672 // Ctbs // chitobiase, di-N-acetyl- // 3|3 H3 // 74245 /// NM_028836 // Ct	Ctbs	NM_001293672		0.0331666	3.63077	0.146065	0.0730327	3.3377	0.154917	0.0774586	0.0331666	1.22524	1.22524	HIGH n-6/n-3 up vs Low n-6n-3
24889	17403745	NM_001081263 // Slc44a5 // solute carrier family 44, member 5 // 3 H3-H4|3 // 242259 //	Slc44a5	NM_001081263		0.00122876	2.49991	0.0833595	0.0416798	2.21113	0.0567331	0.0283666	0.00122876	1.22161	1.22161	HIGH n-6/n-3 up vs Low n-6n-3
24903	17403875	XR_376285 // 1810013D15Rik // RIKEN cDNA 1810013D15 gene // 3|3 // 69042 /// ENSMUST000	1810013D15Rik	XR_376285		0.0293067	2.29781	0.119346	0.0596731	2.68996	0.248318	0.124159	0.0293067	0.761992	-1.31235	HIGH n-6/n-3 down vs Low n-6n-3																							0	0	0
24933	17404139	NM_001127191 // Snx16 // sorting nexin 16 // 3 A1|3 // 74718 /// NM_029068 // Snx16 //	Snx16	NM_001127191		0.00661952	3.9984	0.192691	0.0963455	3.52625	0.129838	0.0649191	0.00661952	1.38718	1.38718	HIGH n-6/n-3 up vs Low n-6n-3
24960	17404329	NM_013755 // Gyg // glycogenin // 3 A2|3 6.19 cM // 27357 /// ENSMUST00000118015 // Gyg	Gyg	NM_013755		0.0144563	7.47113	0.223658	0.111829	6.90137	0.24932	0.12466	0.0144563	1.48428	1.48428	HIGH n-6/n-3 up vs Low n-6n-3
24961	17404337	NM_007753 // Cpa3 // carboxypeptidase A3, mast cell // 3 A2|3 6.25 cM // 12873 /// ENSM	Cpa3	NM_007753		0.0311246	7.66534	0.640572	0.320286	6.36795	0.669232	0.334616	0.0311246	2.45785	2.45785	HIGH n-6/n-3 up vs Low n-6n-3
24964	17404371	ENSMUST00000158221 // Gm26354 // predicted gene, 26354 // --- // ---	Gm26354	ENSMUST00000158221		0.0472663	2.08082	0.20787	0.103935	2.35692	0.077693	0.0388465	0.0472663	0.825819	-1.21092	HIGH n-6/n-3 down vs Low n-6n-3
25005	17404821	NM_009828 // Ccna2 // cyclin A2 // 3 B|3 17.67 cM // 12428 /// ENSMUST00000029270 // Cc	Ccna2	NM_009828		0.0257885	5.24069	0.248876	0.124438	4.51806	0.423012	0.211506	0.0257885	1.65019	1.65019	HIGH n-6/n-3 up vs Low n-6n-3
25045	17405133	ENSMUST00000038108 // Ndufc1 // NADH dehydrogenase (ubiquinone) 1, subcomplex unknown,	Ndufc1	ENSMUST00000038108		0.035902	8.1428	0.240246	0.120123	7.59476	0.328516	0.164258	0.035902	1.4621	1.4621	HIGH n-6/n-3 up vs Low n-6n-3
25097	17405621	NM_001104615 // Vmn2r4 // vomeronasal 2, receptor 4 // 3 E1|3 // 637053 /// ENSMUST0000	Vmn2r4	NM_001104615		0.00150867	2.63662	0.0886792	0.0443396	2.35761	0.0491264	0.0245632	0.00150867	1.21336	1.21336	HIGH n-6/n-3 up vs Low n-6n-3
25147	17405985	NM_019745 // Pdcd10 // programmed cell death 10 // 3 E3|3 // 56426 /// ENSMUST000001611	Pdcd10	NM_019745		0.032025	6.20697	0.0987275	0.0493637	5.91766	0.183291	0.0916453	0.032025	1.22206	1.22206	HIGH n-6/n-3 up vs Low n-6n-3
25152	17406029	NM_019912 // Ube2d2a // ubiquitin-conjugating enzyme E2D 2A // 18 B2|18 // 56550 /// EN	Ube2d2a	NM_019912		0.0103743	8.9473	0.194032	0.0970158	8.4427	0.194181	0.0970903	0.0103743	1.41874	1.41874	HIGH n-6/n-3 up vs Low n-6n-3
25156	17406091	NM_025794 // Etfdh // electron transferring flavoprotein, dehydrogenase // 3 E3|3 34.91	Etfdh	NM_025794		0.0336388	9.28304	0.178474	0.0892372	8.91576	0.199759	0.0998797	0.0336388	1.28992	1.28992	HIGH n-6/n-3 up vs Low n-6n-3																							0	0	0
25206	17406615	NM_153562 // Rrnad1 // ribosomal RNA adenine dimethylase domain containing 1 // 3 F1|3	Rrnad1	NM_153562		0.00189636	3.05822	0.056779	0.0283895	2.77462	0.091609	0.0458045	0.00189636	1.21723	1.21723	HIGH n-6/n-3 up vs Low n-6n-3
25233	17406817	ENSMUST00000029698 // Lamtor2 // late endosomal/lysosomal adaptor, MAPK and MTOR activa	Lamtor2	ENSMUST00000029698		0.0187634	4.8298	0.131791	0.0658955	4.55054	0.115008	0.0575039	0.0187634	1.21357	1.21357	HIGH n-6/n-3 up vs Low n-6n-3
25250	17406979	NM_009057 // Slc50a1 // solute carrier family 50 (sugar transporter), member 1 // 3 F1|	Slc50a1	NM_009057		0.0385146	7.54798	0.225843	0.112921	6.96799	0.376803	0.188401	0.0385146	1.49484	1.49484	HIGH n-6/n-3 up vs Low n-6n-3
25275	17407332	NM_133854 // Snapin // SNAP-associated protein // 3 F1|3 // 20615 /// ENSMUST0000010735	Snapin	NM_133854		0.0296817	5.01001	0.316226	0.158113	4.46786	0.214643	0.107321	0.0296817	1.45614	1.45614	HIGH n-6/n-3 up vs Low n-6n-3
25284	17407341	NM_001293780 // Chtop // chromatin target of PRMT1 // 3|3 F2 // 66511 /// NM_001293781	Chtop	NM_001293780		0.00564992	5.78946	0.101091	0.0505453	5.43858	0.132751	0.0663755	0.00564992	1.27534	1.27534	HIGH n-6/n-3 up vs Low n-6n-3																							0	0	0
25287	17407363	NM_001281852 // S100a9 // S100 calcium binding protein A9 (calgranulin B) // 3 F1-F2|3	S100a9	NM_001281852		0.00333299	3.9836	0.27954	0.13977	3.27713	0.110954	0.055477	0.00333299	1.63181	1.63181	HIGH n-6/n-3 up vs Low n-6n-3
25350	17407708	NM_001163573 // Scnm1 // sodium channel modifier 1 // 3 F2|3 40.74 cM // 69269 /// NM_0	Scnm1	NM_001163573		0.0119315	5.72198	0.220072	0.110036	4.97662	0.356295	0.178148	0.0119315	1.6764	1.6764	HIGH n-6/n-3 up vs Low n-6n-3
25356	17407764	NM_173347 // Prune // prune homolog (Drosophila) // 3 F2.1|3 // 229589 /// ENSMUST00000	Prune	NM_173347		0.0239087	3.81448	0.134562	0.0672811	3.53733	0.126322	0.063161	0.0239087	1.21179	1.21179	HIGH n-6/n-3 up vs Low n-6n-3
25358	17407794	ENSMUST00000098867 // Gm10691 // predicted gene 10691 // --- // --- /// AK144859 // 633	Gm10691	ENSMUST00000098867		0.00637092	2.74357	0.0998032	0.0499016	3.02914	0.0972774	0.0486387	0.00637092	0.820415	-1.21889	HIGH n-6/n-3 down vs Low n-6n-3																							0	0	0
25381	17408024	NM_010186 // Fcgr1 // Fc receptor, IgG, high affinity I // 3 F2.1|3 41.72 cM // 14129 /	Fcgr1	NM_010186		0.0238913	3.89259	0.320727	0.160363	3.31272	0.214942	0.107471	0.0238913	1.49471	1.49471	HIGH n-6/n-3 up vs Low n-6n-3																							0	0	0
25439	17408640	ENSMUST00000083774 // Gm22826 // predicted gene, 22826 // --- // ---	Gm22826	ENSMUST00000083774		0.0400302	2.84887	0.082468	0.041234	3.16242	0.225511	0.112756	0.0400302	0.804657	-1.24277	HIGH n-6/n-3 down vs Low n-6n-3
25460	17408863	NM_009725 // Atp5f1 // ATP synthase, H+ transporting, mitochondrial F0 complex, subunit	Atp5f1	NM_009725		0.0218548	9.14674	0.121273	0.0606364	8.68423	0.275493	0.137747	0.0218548	1.37794	1.37794	HIGH n-6/n-3 up vs Low n-6n-3
25462	17408885	XM_006543807 // Chil5 // chitinase-like 5 // 3 F2.2|3 // 229687 /// XM_006543809 // Chi	Chil5	XM_006543807		0.0258253	2.31503	0.127606	0.0638029	2.63075	0.172423	0.0862116	0.0258253	0.803453	-1.24463	HIGH n-6/n-3 down vs Low n-6n-3
25489	17409217	NM_010306 // Gnai3 // guanine nucleotide binding protein (G protein), alpha inhibiting	Gnai3	NM_010306		0.016596	7.14623	0.120206	0.060103	6.76874	0.195403	0.0977013	0.016596	1.29908	1.29908	HIGH n-6/n-3 up vs Low n-6n-3
25500	17409376	ENSMUST00000157560 // Scarna2 // small Cajal body-specific RNA 2 // --- // --- /// NR_0	Scarna2	ENSMUST00000157560		0.0364091	8.32812	0.157385	0.0786927	8.83703	0.345238	0.172619	0.0364091	0.702749	-1.42298	HIGH n-6/n-3 down vs Low n-6n-3
25502	17409386	NM_029522 // Gpsm2 // G-protein signalling modulator 2 (AGS3-like, C. elegans) // 3 F3|	Gpsm2	NM_029522		0.00584553	4.57891	0.192548	0.096274	4.12922	0.0965912	0.0482956	0.00584553	1.36575	1.36575	HIGH n-6/n-3 up vs Low n-6n-3
25524	17409627	NR_027895 // A930005H10Rik // RIKEN cDNA A930005H10 gene // 3 G1|3 // 68161 /// NR_0154	A930005H10Rik	NR_027895		0.0321318	2.5669	0.142914	0.0714568	2.90968	0.201319	0.100659	0.0321318	0.78852	-1.2682	HIGH n-6/n-3 down vs Low n-6n-3
25531	17409690	NM_025517 // Rtca // RNA 3-terminal phosphate cyclase // 3 G1|3 // 66368 /// ENSMUST000	Rtca	NM_025517		0.00145154	6.00432	0.113714	0.056857	5.67576	0.0332909	0.0166454	0.00145154	1.25576	1.25576	HIGH n-6/n-3 up vs Low n-6n-3
25574	17410239	NM_027482 // 5730508B09Rik // RIKEN cDNA 5730508B09 gene // 3|3 H1 // 70617 /// ENSMUST	5730508B09Rik	NM_027482		0.0404874	5.63969	0.29055	0.145275	5.18957	0.187548	0.0937741	0.0404874	1.36616	1.36616	HIGH n-6/n-3 up vs Low n-6n-3
25592	17410424	NM_007926 // Aimp1 // aminoacyl tRNA synthetase complex-interacting multifunctional pro	Aimp1	NM_007926		0.0273911	5.90318	0.200361	0.10018	5.5609	0.125046	0.0625229	0.0273911	1.26775	1.26775	HIGH n-6/n-3 up vs Low n-6n-3
25618	17410680	NM_175224 // Metap1 // methionyl aminopeptidase 1 // 3 G3|3 // 75624 /// ENSMUST0000002	Metap1	NM_175224		0.0213437	7.15066	0.202976	0.101488	6.69484	0.213896	0.106948	0.0213437	1.37156	1.37156	HIGH n-6/n-3 up vs Low n-6n-3
25626	17410748	NM_001190852 // Pdlim5 // PDZ and LIM domain 5 // 3|3 H3 // 56376 /// NM_001190854 // P	Pdlim5	NM_001190852		0.0484665	6.67593	0.114304	0.0571522	6.41136	0.181195	0.0905974	0.0484665	1.20128	1.20128	HIGH n-6/n-3 up vs Low n-6n-3																							0	0	0
25664	17411163	ENSMUST00000029670 // Ptgfr // prostaglandin F receptor // 3 H3|3 76.96 cM // 19220 ///	Ptgfr	ENSMUST00000029670		0.0475079	2.87974	0.140544	0.0702718	2.65461	0.114401	0.0572005	0.0475079	1.16888	1.16888	HIGH n-6/n-3 up vs Low n-6n-3
25742	17411939	NM_028264 // Tmem55a // transmembrane protein 55A // 4 A1-A2|4 // 72519 /// ENSMUST0000	Tmem55a	NM_028264		0.0252214	5.77964	0.21764	0.10882	5.28804	0.250645	0.125322	0.0252214	1.406	1.406	HIGH n-6/n-3 up vs Low n-6n-3
25782	17412350	NM_009316 // Map3k7 // mitogen-activated protein kinase kinase kinase 7 // 4 A5|4 // 26	Map3k7	NM_009316		0.0317343	6.20537	0.109271	0.0546356	5.92129	0.172172	0.0860862	0.0317343	1.21764	1.21764	HIGH n-6/n-3 up vs Low n-6n-3
25870	17413137	NM_001048179 // Ccl27a // chemokine (C-C motif) ligand 27A // 4 A5|4 22.08 cM // 20301	Ccl27a	NM_001048179		0.0329434	3.63433	0.186047	0.0930234	3.25418	0.203426	0.101713	0.0329434	1.30147	1.30147	HIGH n-6/n-3 up vs Low n-6n-3
25901	17413511	NM_001080385 // Clta // clathrin, light polypeptide (Lca) // 4 B1|4 // 12757 /// ENSMUS	Clta	NM_001080385		0.0474426	7.38055	0.192739	0.0963696	6.87215	0.360817	0.180408	0.0474426	1.42247	1.42247	HIGH n-6/n-3 up vs Low n-6n-3
25904	17413528	NM_010790 // Melk // maternal embryonic leucine zipper kinase // 4 B1|4 23.46 cM // 172	Melk	NM_010790		0.025667	3.45448	0.180408	0.0902039	3.10483	0.153978	0.0769888	0.025667	1.27425	1.27425	HIGH n-6/n-3 up vs Low n-6n-3
25914	17413649	NM_153167 // Dcaf10 // DDB1 and CUL4 associated factor 10 // 4 B1|4 // 242418 /// ENSMU	Dcaf10	NM_153167		0.0418248	5.87129	0.246203	0.123102	5.45664	0.206842	0.103421	0.0418248	1.33298	1.33298	HIGH n-6/n-3 up vs Low n-6n-3
25956	17414114	NM_008017 // Smc2 // structural maintenance of chromosomes 2 // 4 B3|4 28.31 cM // 1421	Smc2	NM_008017		0.00823473	5.27194	0.139836	0.0699179	4.90152	0.130497	0.0652486	0.00823473	1.29273	1.29273	HIGH n-6/n-3 up vs Low n-6n-3
25963	17414188	NM_001159633 // Slc44a1 // solute carrier family 44, member 1 // 4 B2|4 // 100434 /// N	Slc44a1	NM_001159633		0.044028	7.28176	0.154576	0.077288	6.97389	0.186635	0.0933175	0.044028	1.23788	1.23788	HIGH n-6/n-3 up vs Low n-6n-3
25981	17414331	NM_001081420 // Fam206a // family with sequence similarity 206, member A // 4 B3|4 // 2	Fam206a	NM_001081420		0.0413716	3.82039	0.160143	0.0800714	3.52437	0.163468	0.0817342	0.0413716	1.22775	1.22775	HIGH n-6/n-3 up vs Low n-6n-3
26000	17414497	XM_006536399 // Mup6 // major urinary protein 6 // 4 B3|4 // 620807	Mup6	XM_006536399		0.0384273	2.19172	0.068644	0.034322	2.46138	0.192228	0.0961141	0.0384273	0.829516	-1.20552	HIGH n-6/n-3 down vs Low n-6n-3
26011	17414600	NM_001081650 // Rgs3 // regulator of G-protein signaling 3 // 4 B3|4 33.19 cM // 50780	Rgs3	NM_001081650		0.033838	4.03701	0.0895868	0.0447934	3.84264	0.110166	0.0550829	0.033838	1.14422	1.14422	HIGH n-6/n-3 up vs Low n-6n-3
26075	17415236	ENSMUST00000130576 // Gm12631 // predicted gene 12631 // --- // ---	Gm12631	ENSMUST00000130576		0.00859061	2.79937	0.143732	0.0718659	3.09454	0.0549075	0.0274538	0.00859061	0.814975	-1.22703	HIGH n-6/n-3 down vs Low n-6n-3
26124	17415542	ENSMUST00000083811 // Gm25004 // predicted gene, 25004 // --- // ---	Gm25004	ENSMUST00000083811		0.0221781	2.4391	0.180123	0.0900613	2.82599	0.177283	0.0886413	0.0221781	0.764778	-1.30757	HIGH n-6/n-3 down vs Low n-6n-3
26134	17415715	NM_146144 // Usp1 // ubiquitin specific peptidase 1 // 4 C6|4 // 230484 /// ENSMUST0000	Usp1	NM_146144		0.00626785	6.63685	0.108328	0.0541641	6.28231	0.134133	0.0670666	0.00626785	1.27858	1.27858	HIGH n-6/n-3 up vs Low n-6n-3
26143	17415778	NM_001081264 // Alg6 // asparagine-linked glycosylation 6 (alpha-1,3,-glucosyltransfera	Alg6	NM_001081264		0.0208194	3.28602	0.101196	0.0505982	2.99738	0.155529	0.0777644	0.0208194	1.22149	1.22149	HIGH n-6/n-3 up vs Low n-6n-3
26163	17415979	NM_001122899 // Lepr // leptin receptor // 4 C6|4 46.96 cM // 16847 /// NM_010704 // Le	Lepr	NM_001122899		0.0364258	2.65886	0.112213	0.0561065	2.59228	0.0762457	0.0381229	0.364258	1.04723	1.04723	HIGH n-6/n-3 up vs Low n-6n-3
26167	17416023	NM_001177980 // Pde4b // phosphodiesterase 4B, cAMP specific // 4 C6|4 46.99 cM // 1857	Pde4b	NM_001177980		0.0397203	2.92462	0.136478	0.068239	2.65375	0.155589	0.0777947	0.0397203	1.20653	1.20653	HIGH n-6/n-3 up vs Low n-6n-3
26196	17416481	NM_028355 // Ndc1 // NDC1 transmembrane nucleoporin // 4 C7|4 // 72787 /// XM_006503423	Ndc1	NM_028355		0.00587921	5.35722	0.120522	0.0602611	4.94698	0.15553	0.0777652	0.00587921	1.32891	1.32891	HIGH n-6/n-3 up vs Low n-6n-3
26284	17417456	NM_001037916 // Ccdc17 // coiled-coil domain containing 17 // 4 D1|4 // 622665 /// ENSM	Ccdc17	NM_001037916		0.0084899	2.74484	0.0736435	0.0368217	2.45623	0.130728	0.0653641	0.0084899	1.22146	1.22146	HIGH n-6/n-3 up vs Low n-6n-3
26313	17417749	NM_173719 // Med8 // mediator complex subunit 8 // 4 D1|4 // 80509 /// XM_006503492 //	Med8	NM_173719		0.0433956	3.52652	0.256372	0.128186	3.17348	0.104157	0.0520784	0.0433956	1.27725	1.27725	HIGH n-6/n-3 up vs Low n-6n-3
26360	17418177	NM_013905 // Heyl // hairy/enhancer-of-split related with YRPW motif-like // 4 D2.2|4 /	Heyl	NM_013905		0.00668014	4.31251	0.0367199	0.01836	3.92665	0.186684	0.093342	0.00668014	1.30663	1.30663	HIGH n-6/n-3 up vs Low n-6n-3
26361	17418187	ENSMUST00000106243 // Pabpc4 // poly(A) binding protein, cytoplasmic 4 // 4 D2.2|4 // 2	Pabpc4	ENSMUST00000106243		0.0430781	5.39369	0.216424	0.108212	5.07172	0.128754	0.0643769	0.0430781	1.25004	1.25004	HIGH n-6/n-3 up vs Low n-6n-3																							0	0	0
26388	17418357	ENSMUST00000102628 // Yrdc // yrdC domain containing (E.coli) // 4 D2.2|4 // 230734 ///	Yrdc	ENSMUST00000102628		0.00601397	4.38967	0.135191	0.0675955	4.06219	0.081467	0.0407335	0.00601397	1.25482	1.25482	HIGH n-6/n-3 up vs Low n-6n-3
26399	17418507	NM_025544 // Mrps15 // mitochondrial ribosomal protein S15 // 4|4 D2.1 // 66407 /// ENS	Mrps15	NM_025544		0.046636	6.81827	0.248191	0.124096	6.34961	0.281355	0.140678	0.046636	1.38382	1.38382	HIGH n-6/n-3 up vs Low n-6n-3
26404	17418560	ENSMUST00000052876 // Eva1b // eva-1 homolog B (C. elegans) // 4 D2.2|4 // 230752 /// N	Eva1b	ENSMUST00000052876		0.0241294	3.61116	0.139575	0.0697873	3.31979	0.135461	0.0677306	0.0241294	1.2238	1.2238	HIGH n-6/n-3 up vs Low n-6n-3
26417	17418749	NM_030252 // Smim12 // small integral membrane protein 12 // 4 D2.2|4 // 80284 /// ENSM	Smim12	NM_030252		0.0404224	5.77022	0.204907	0.102453	5.346	0.253256	0.126628	0.0404224	1.34185	1.34185	HIGH n-6/n-3 up vs Low n-6n-3
26443	17419025	ENSMUST00000129515 // Tmem234 // transmembrane protein 234 // 4|4 D2.3 // 76799 /// ENS	Tmem234	ENSMUST00000129515		0.0401277	6.89713	0.197341	0.0986706	6.47239	0.258843	0.129422	0.0401277	1.34233	1.34233	HIGH n-6/n-3 up vs Low n-6n-3
26475	17419277	NM_011520 // Sdc3 // syndecan 3 // 4 D2.3|4 63.63 cM // 20970 /// ENSMUST00000070478 //	Sdc3	NM_011520		0.0313205	6.12112	0.0625178	0.0312589	5.72944	0.273089	0.136545	0.0313205	1.31192	1.31192	HIGH n-6/n-3 up vs Low n-6n-3
26489	17419407	NR_034050 // Snora44 // small nucleolar RNA, H/ACA box 44 // 4|4 // 100217418 /// ENSMU	Snora44	NR_034050		0.0287826	9.9629	0.416442	0.208221	10.9248	0.528121	0.26406	0.0287826	0.51337	-1.94791	HIGH n-6/n-3 down vs Low n-6n-3
26506	17419587	NM_016981 // Slc9a1 // solute carrier family 9 (sodium/hydrogen exchanger), member 1 //	Slc9a1	NM_016981		0.0448538	5.7454	0.118718	0.0593588	5.43122	0.218477	0.109239	0.0448538	1.24331	1.24331	HIGH n-6/n-3 up vs Low n-6n-3
26516	17419658	ENSMUST00000137962 // Gm13061 // predicted gene 13061 // --- // ---	Gm13061	ENSMUST00000137962		0.0436482	2.06626	0.119336	0.0596679	2.41663	0.247857	0.123929	0.0436482	0.784383	-1.27489	HIGH n-6/n-3 down vs Low n-6n-3
26561	17420152	ENSMUST00000175107 // Gm23263 // predicted gene, 23263 // --- // ---	Gm23263	ENSMUST00000175107		0.00153145	3.91848	0.0387943	0.0193971	3.57221	0.120074	0.0600372	0.00153145	1.27127	1.27127	HIGH n-6/n-3 up vs Low n-6n-3
26702	17421536	NM_029841 // 2510039O18Rik // RIKEN cDNA 2510039O18 gene // 4|4 E1 // 77034 /// ENSMUST	2510039O18Rik	NM_029841		0.0283702	6.2369	0.246735	0.123368	5.71552	0.266443	0.133221	0.0283702	1.43533	1.43533	HIGH n-6/n-3 up vs Low n-6n-3
26704	17421545	NM_008725 // Nppa // natriuretic peptide type A // 4 E2|4 78.66 cM // 230899 /// ENSMUS	Nppa	NM_008725		0.0334182	2.81634	0.15783	0.0789151	3.17509	0.208101	0.10405	0.0334182	0.779839	-1.28232	HIGH n-6/n-3 down vs Low n-6n-3
26712	17421665	NM_016699 // Exosc10 // exosome component 10 // 4 E2|4 // 50912 /// XM_006539023 // Exo	Exosc10	NM_016699		0.010852	6.29017	0.155797	0.0778987	5.93936	0.113612	0.0568061	0.010852	1.27528	1.27528	HIGH n-6/n-3 up vs Low n-6n-3
26750	17422039	NM_001033352 // Klhl21 // kelch-like 21 // 4 E2|4 // 242785 /// ENSMUST00000097773 // K	Klhl21	NM_001033352		0.00186649	3.03109	0.0912969	0.0456484	3.33719	0.0715008	0.0357504	0.00186649	0.808824	-1.23636	HIGH n-6/n-3 down vs Low n-6n-3
26782	17422449	NM_172990 // Pank4 // pantothenate kinase 4 // 4 E2|4 // 269614 /// XR_390757 // Pank4	Pank4	NM_172990		0.0353948	4.52748	0.241909	0.120955	4.16874	0.109054	0.0545271	0.0353948	1.2823	1.2823	HIGH n-6/n-3 up vs Low n-6n-3
26784	17422476	ENSMUST00000125432 // Pex10 // peroxisomal biogenesis factor 10 // 4 E2|4 // 668173 ///	Pex10	ENSMUST00000125432		0.0504802	3.8737	0.0642486	0.0321243	3.60194	0.213302	0.106651	0.0504802	1.20728	1.20728	HIGH n-6/n-3 up vs Low n-6n-3
26821	17422949	XM_006538385 // Gm11787 // predicted gene 11787 // 4 A1|4 // 666513 /// ENSMUST00000121	Gm11787	XM_006538385		0.0151684	3.55601	0.247691	0.123845	3.09037	0.123774	0.0618871	0.0151684	1.38092	1.38092	HIGH n-6/n-3 up vs Low n-6n-3
26876	17423490	NM_138952 // Ripk2 // receptor (TNFRSF)-interacting serine-threonine kinase 2 // 4 A2|4	Ripk2	NM_138952		0.0421732	5.08886	0.196264	0.0981318	4.796	0.11535	0.0576751	0.0421732	1.22506	1.22506	HIGH n-6/n-3 up vs Low n-6n-3
26900	17423699	ENSMUST00000083106 // Gm24977 // predicted gene, 24977 // --- // ---	Gm24977	ENSMUST00000083106		0.0398027	3.85817	0.126438	0.0632189	4.31764	0.327747	0.163873	0.0398027	0.727251	-1.37504	HIGH n-6/n-3 down vs Low n-6n-3
26904	17423713	NM_172865 // Manea // mannosidase, endo-alpha // 4 A3|4 // 242362 /// ENSMUST0000004137	Manea	NM_172865		0.0457801	6.32245	0.213961	0.106981	5.873	0.286833	0.143416	0.0457801	1.36552	1.36552	HIGH n-6/n-3 up vs Low n-6n-3
26935	17423972	ENSMUST00000083410 // Gm25581 // predicted gene, 25581 // --- // ---	Gm25581	ENSMUST00000083410		0.0274183	4.39922	0.285727	0.142864	4.87661	0.164099	0.0820497	0.0274183	0.718278	-1.39222	HIGH n-6/n-3 down vs Low n-6n-3
26966	17424276	NM_027147 // Enho // energy homeostasis associated // 4 A5|4 // 69638 /// ENSMUST000001	Enho	NM_027147		0.047921	3.1553	0.206002	0.103001	2.86287	0.115148	0.0575739	0.047921	1.2247	1.2247	HIGH n-6/n-3 up vs Low n-6n-3
27063	17425228	NM_178603 // Mrpl50 // mitochondrial ribosomal protein L50 // 4 B1|4 26.54 cM // 28028	Mrpl50	NM_178603		0.0243703	5.75203	0.158826	0.0794128	5.33294	0.231172	0.115586	0.0243703	1.33708	1.33708	HIGH n-6/n-3 up vs Low n-6n-3
27218	17427051	NM_025760 // Ptplad2 // protein tyrosine phosphatase-like A domain containing 2 // 4 C4	Ptplad2	NM_025760		0.0325798	4.42944	0.332417	0.166209	3.7644	0.347389	0.173694	0.0325798	1.58562	1.58562	HIGH n-6/n-3 up vs Low n-6n-3
27271	17427379	NM_001104927 // Cyp2j8 // cytochrome P450, family 2, subfamily j, polypeptide 8 // 4 C5	Cyp2j8	NM_001104927		0.017859	1.97109	0.0725102	0.0362551	2.24733	0.154782	0.0773911	0.017859	0.825741	-1.21103	HIGH n-6/n-3 down vs Low n-6n-3
27280	17427462	NM_053157 // Tm2d1 // TM2 domain containing 1 // 4 C6|4 // 94043 /// ENSMUST00000030292	Tm2d1	NM_053157		0.0219835	7.12125	0.071957	0.0359785	6.76757	0.219	0.1095	0.0219835	1.27781	1.27781	HIGH n-6/n-3 up vs Low n-6n-3
27333	17427958	ENSMUST00000142425 // Lrp8os1 // low density lipoprotein receptor-related protein 8, ap	Lrp8os1	ENSMUST00000142425		0.0231024	1.7942	0.0453371	0.0226686	1.71828	0.0213522	0.0106761	0.0231024	1.05403	1.05403	HIGH n-6/n-3 up vs Low n-6n-3
27334	17427961	NM_009949 // Cpt2 // carnitine palmitoyltransferase 2 // 4 C7|4 50.18 cM // 12896 /// E	Cpt2	NM_009949		0.0242274	7.64502	0.162479	0.0812395	7.35547	0.105058	0.0525288	0.0242274	1.22226	1.22226	HIGH n-6/n-3 up vs Low n-6n-3
27389	17428600	NM_001042743 // Mast2 // microtubule associated serine/threonine kinase 2 // 4|4 C7 //	Mast2	NM_001042743		0.0143935	5.75791	0.101168	0.0505841	5.44118	0.156072	0.0780362	0.0143935	1.2455	1.2455	HIGH n-6/n-3 up vs Low n-6n-3
27448	17429177	NM_023223 // Cdc20 // cell division cycle 20 // 4 D2.1|4 // 107995 /// ENSMUST000000065	Cdc20	NM_023223		0.033673	5.79164	0.187487	0.0937433	5.29791	0.307556	0.153778	0.033673	1.40807	1.40807	HIGH n-6/n-3 up vs Low n-6n-3
27482	17429495	NM_001048168 // Nfyc // nuclear transcription factor-Y gamma // 4 D2.2|4 56.52 cM // 18	Nfyc	NM_001048168		0.0223027	4.25596	0.112013	0.0560066	3.98784	0.134971	0.0674857	0.0223027	1.20424	1.20424	HIGH n-6/n-3 up vs Low n-6n-3
27485	17429516	NM_001160043 // Exo5 // exonuclease 5 // 4 D2.2|4 // 73172 /// NM_028457 // Exo5 // exo	Exo5	NM_001160043		0.0100008	3.81523	0.13653	0.0682649	3.41839	0.164903	0.0824515	0.0100008	1.31663	1.31663	HIGH n-6/n-3 up vs Low n-6n-3
27490	17429564	NM_001081312 // Tmco2 // transmembrane and coiled-coil domains 2 // 4 D2.2|4 // 69469 /	Tmco2	NM_001081312		9.80877e-05	2.38482	0.036254	0.018127	2.70987	0.0614351	0.0307175	9.80877e-05	0.798269	-1.25271	HIGH n-6/n-3 down vs Low n-6n-3
27545	17430192	NM_026670 // Zmym1 // zinc finger, MYM domain containing 1 // 4 D2.2|4 // 68310 /// ENS	Zmym1	NM_026670		0.0496137	3.72983	0.0842601	0.04213	3.43196	0.227813	0.113907	0.0496137	1.22933	1.22933	HIGH n-6/n-3 up vs Low n-6n-3
27586	17430609	XM_006536985 // Serinc2 // serine incorporator 2 // 4 D2.2|4 // 230779 /// NM_001253386	Serinc2	XM_006536985		0.0287212	2.72211	0.230003	0.115002	2.38805	0.0398881	0.0199441	0.0287212	1.26056	1.26056	HIGH n-6/n-3 up vs Low n-6n-3
27609	17430833	NR_028512 // Snora73a // small nucleolar RNA, H/ACA box 73a // 4 D2.3|4 // 100306944 //	Snora73a	NR_028512		0.0356703	8.22135	0.288665	0.144333	8.76213	0.278158	0.139079	0.0356703	0.687399	-1.45476	HIGH n-6/n-3 down vs Low n-6n-3
27634	17431053	NM_001017968 // Zdhhc18 // zinc finger, DHHC domain containing 18 // 4 D2.3|4 // 503610	Zdhhc18	NM_001017968		0.0119208	6.77257	0.10686	0.0534298	6.43274	0.158176	0.079088	0.0119208	1.2656	1.2656	HIGH n-6/n-3 up vs Low n-6n-3
27639	17431134	ENSMUST00000158696 // Gm22523 // predicted gene, 22523 // --- // ---	Gm22523	ENSMUST00000158696		0.00320654	1.82068	0.0501594	0.0250797	2.08785	0.101075	0.0505376	0.00320654	0.830951	-1.20344	HIGH n-6/n-3 down vs Low n-6n-3
27667	17431454	NM_028995 // Nipal3 // NIPA-like domain containing 3 // 4 D3|4 // 74552 /// XM_00653922	Nipal3	NM_028995		0.0159701	3.69988	0.116717	0.0583587	3.40212	0.136081	0.0680403	0.0159701	1.22923	1.22923	HIGH n-6/n-3 up vs Low n-6n-3
27736	17432264	NM_001033150 // Plekhm2 // pleckstrin homology domain containing, family M (with RUN do	Plekhm2	NM_001033150		0.0383507	4.7327	0.154923	0.0774613	4.38145	0.215899	0.10795	0.0383507	1.27567	1.27567	HIGH n-6/n-3 up vs Low n-6n-3
27835	17433328	NM_001289877 // Per3 // period circadian clock 3 // 4 E2|4 // 18628 /// NM_001289878 //	Per3	NM_001289877		0.0155981	4.55658	0.190656	0.095328	4.1546	0.146852	0.0734258	0.0155981	1.32132	1.32132	HIGH n-6/n-3 up vs Low n-6n-3
27884	17433920	NM_001033490 // Pusl1 // pseudouridylate synthase-like 1 // 4 E2|4 87.66 cM // 433813 /	Pusl1	NM_001033490		0.00509647	4.42622	0.139801	0.0699006	3.80809	0.251269	0.125635	0.00509647	1.53488	1.53488	HIGH n-6/n-3 up vs Low n-6n-3
27885	17433931	NM_080445 // B3galt6 // UDP-Gal:betaGal beta 1,3-galactosyltransferase, polypeptide 6 /	B3galt6	NM_080445		0.00428021	2.73727	0.0760558	0.0380279	2.47392	0.0903232	0.0451616	0.00428021	1.20027	1.20027	HIGH n-6/n-3 up vs Low n-6n-3
27915	17434210	NM_001199961 // Ccl27b // chemokine (C-C motif) ligand 27b // 4 A5|4 // 100040048 /// N	Ccl27b	NM_001199961		0.0292525	3.72009	0.163781	0.0818904	3.42041	0.132145	0.0660723	0.0292525	1.23088	1.23088	HIGH n-6/n-3 up vs Low n-6n-3
27915	17434210	NM_001199961 // Ccl27b // chemokine (C-C motif) ligand 27b // 4 A5|4 // 100040048 /// N	Ccl27b	NM_001199961		0.0292525	3.72009	0.163781	0.0818904	3.42041	0.132145	0.0660723	0.0292525	1.23088	1.23088	HIGH n-6/n-3 up vs Low n-6n-3
27941	17434475	ENSMUST00000181751 // Gm26825 // predicted gene, 26825 // --- // ---	Gm26825	ENSMUST00000181751		0.00239527	7.94048	0.472171	0.236085	9.39552	0.335572	0.167786	0.00239527	0.364746	-2.74163	HIGH n-6/n-3 down vs Low n-6n-3
28009	17435311	NM_029020 // Abcb8 // ATP-binding cassette, sub-family B (MDR/TAP), member 8 // 5 A3|5	Abcb8	NM_029020		0.0176402	4.95119	0.132823	0.0664114	4.69526	0.085348	0.042674	0.0176402	1.19411	1.19411	HIGH n-6/n-3 up vs Low n-6n-3
28033	17435584	NM_153526 // Insig1 // insulin induced gene 1 // 5 B1|5 // 231070 /// ENSMUST0000005915	Insig1	NM_153526		0.0455426	8.11676	0.610864	0.305432	7.32503	0.151606	0.0758028	0.0455426	1.73115	1.73115	HIGH n-6/n-3 up vs Low n-6n-3
28086	17436328	NM_001205132 // Yes1 // Yamaguchi sarcoma viral (v-yes) oncogene homolog 1 // 5 B1|5 17	Yes1	NM_001205132		0.0202844	5.08134	0.180653	0.0903264	4.77635	0.072832	0.036416	0.0202844	1.23541	1.23541	HIGH n-6/n-3 up vs Low n-6n-3
28155	17437263	NM_025895 // Med28 // mediator complex subunit 28 // 5 B3|5 // 66999 /// ENSMUST0000001	Med28	NM_025895		0.00210357	4.0732	0.0804274	0.0402137	3.80048	0.0687306	0.0343653	0.00210357	1.20808	1.20808	HIGH n-6/n-3 up vs Low n-6n-3
28183	17437558	NM_001122758 // Pcdh7 // protocadherin 7 // 5 C3-D|5 // 54216 /// NM_018764 // Pcdh7 //	Pcdh7	NM_001122758		0.0385487	4.67678	0.208598	0.104299	4.17349	0.319187	0.159594	0.0385487	1.41744	1.41744	HIGH n-6/n-3 up vs Low n-6n-3
28194	17437631	NM_019636 // Tbc1d1 // TBC1 domain family, member 1 // 5 C3.1|5 // 57915 /// ENSMUST000	Tbc1d1	NM_019636		0.0166874	4.32214	0.205648	0.102824	3.92487	0.127117	0.0635586	0.0166874	1.31702	1.31702	HIGH n-6/n-3 up vs Low n-6n-3
28215	17437937	NM_178651 // Slc30a9 // solute carrier family 30 (zinc transporter), member 9 // 5 C3.1	Slc30a9	NM_178651		0.00278902	7.10347	0.0832355	0.0416177	6.82073	0.080895	0.0404475	0.00278902	1.2165	1.2165	HIGH n-6/n-3 up vs Low n-6n-3
28237	17438177	ENSMUST00000152787 // Usp46os2 // ubiquitin specific peptidase 46, opposite strand 2 //	Usp46os2	ENSMUST00000152787		0.0175363	2.91004	0.126398	0.063199	3.17856	0.106686	0.0533432	0.0175363	0.830172	-1.20457	HIGH n-6/n-3 down vs Low n-6n-3
28239	17438189	NM_026878 // Rasl11b // RAS-like, family 11, member B // 5|5 D // 68939 /// ENSMUST0000	Rasl11b	NM_026878		0.0262634	3.69097	0.290013	0.145006	3.14068	0.238583	0.119292	0.0262634	1.46438	1.46438	HIGH n-6/n-3 up vs Low n-6n-3
28248	17438301	NM_020611 // Srd5a3 // steroid 5 alpha-reductase 3 // 5 C3.3|5 // 57357 /// XM_00653516	Srd5a3	NM_020611		0.0348682	5.16266	0.189793	0.0948964	4.87661	0.0915232	0.0457616	0.0348682	1.2193	1.2193	HIGH n-6/n-3 up vs Low n-6n-3
28332	17439037	NM_145562 // Parm1 // prostate androgen-regulated mucin-like protein 1 // 5 E2|5 // 231	Parm1	NM_145562		0.0210663	4.43417	0.214297	0.107148	4.02469	0.154222	0.0771108	0.0210663	1.32821	1.32821	HIGH n-6/n-3 up vs Low n-6n-3
28333	17439045	NR_028429 // Thap6 // THAP domain containing 6 // 5 E2|5 // 381650 /// AK015967 // Thap	Thap6	NR_028429		0.00446451	4.1498	0.0649721	0.032486	3.87747	0.104662	0.052331	0.00446451	1.20776	1.20776	HIGH n-6/n-3 up vs Low n-6n-3
28397	17439560	ENSMUST00000046721 // 4930524J08Rik // RIKEN cDNA 4930524J08 gene // --- // --- /// AK0	4930524J08Rik	ENSMUST00000046721		0.000288603	2.6215	0.110509	0.0552544	2.15887	0.0544992	0.0272496	0.000288603	1.37805	1.37805	HIGH n-6/n-3 up vs Low n-6n-3
28402	17439590	NM_012001 // Cops4 // COP9 (constitutive photomorphogenic) homolog, subunit 4 (Arabidop	Cops4	NM_012001		0.00620987	6.94281	0.135483	0.0677415	6.54994	0.134163	0.0670816	0.00620987	1.313	1.313	HIGH n-6/n-3 up vs Low n-6n-3
28406	17439622	ENSMUST00000092990 // Agpat9 // 1-acylglycerol-3-phosphate O-acyltransferase 9 // 5 E4|	Agpat9	ENSMUST00000092990		0.0346708	6.73304	0.428394	0.214197	6.14017	0.0812666	0.0406333	0.0346708	1.50825	1.50825	HIGH n-6/n-3 up vs Low n-6n-3
28422	17439815	NM_008318 // Ibsp // integrin binding sialoprotein // 5 E5|5 50.68 cM // 15891 /// ENSM	Ibsp	NM_008318		0.00404685	2.20897	0.0467111	0.0233555	2.63339	0.182184	0.091092	0.00404685	0.745143	-1.34202	HIGH n-6/n-3 down vs Low n-6n-3
28518	17440826	NM_133904 // Acacb // acetyl-Coenzyme A carboxylase beta // 5 F|5 // 100705 /// XM_0065	Acacb	NM_133904		0.0436457	5.14023	0.268797	0.134399	5.32017	0.33785	0.168925	0.436457	0.882743	-1.13283	HIGH n-6/n-3 down vs Low n-6n-3
28521	17440954	NM_023556 // Mvk // mevalonate kinase // 5 F|5 55.99 cM // 17855 /// XM_006530183 // Mv	Mvk	NM_023556		0.00794134	4.19588	0.205114	0.102557	3.64965	0.190286	0.095143	0.00794134	1.46027	1.46027	HIGH n-6/n-3 up vs Low n-6n-3																							0	0	0
28572	17441585	ENSMUST00000122599 // n-R5s175 // nuclear encoded rRNA 5S 175 // --- // ---	n-R5s175	ENSMUST00000122599		0.0344699	2.33625	0.243612	0.121806	2.68496	0.0788384	0.0394192	0.0344699	0.785285	-1.27342	HIGH n-6/n-3 down vs Low n-6n-3
28606	17442071	ENSMUST00000155671 // Vps29 // vacuolar protein sorting 29 (S. pombe) // 5 F|5 // 56433	Vps29	ENSMUST00000155671		0.0333608	6.2129	0.153458	0.076729	5.88428	0.183394	0.0916971	0.0333608	1.25581	1.25581	HIGH n-6/n-3 up vs Low n-6n-3
28668	17442940	ENSMUST00000083370 // Gm23245 // predicted gene, 23245 // --- // ---	Gm23245	ENSMUST00000083370		0.0431866	12.2988	0.13972	0.06986	11.8845	0.292652	0.146326	0.0431866	1.33267	1.33267	HIGH n-6/n-3 up vs Low n-6n-3
28698	17443181	NM_025362 // Dnajc30 // DnaJ (Hsp40) homolog, subfamily C, member 30 // 5 G2|5 // 66114	Dnajc30	NM_025362		0.00338156	4.23289	0.118918	0.0594588	3.88438	0.0894568	0.0447284	0.00338156	1.27325	1.27325	HIGH n-6/n-3 up vs Low n-6n-3
28745	17443785	ENSMUST00000110934 // Cnpy4 // canopy 4 homolog (zebrafish) // 5 G2|5 // 66455 /// BC09	Cnpy4	ENSMUST00000110934		0.047557	4.9325	0.108167	0.0540833	4.65716	0.193535	0.0967676	0.047557	1.21029	1.21029	HIGH n-6/n-3 up vs Low n-6n-3
28780	17444117	NM_001276287 // Brat1 // BRCA1-associated ATM activator 1 // 5 G2|5 // 231841 /// NM_18	Brat1	NM_001276287		0.00341422	3.74213	0.102	0.0510002	3.38745	0.112347	0.0561736	0.00341422	1.27871	1.27871	HIGH n-6/n-3 up vs Low n-6n-3																							0	0	0
28783	17444152	NM_177879 // Sdk1 // sidekick homolog 1 (chicken) // 5 G2|5 // 330222 /// ENSMUST000000	Sdk1	NM_177879		0.00668962	3.50791	0.0767276	0.0383638	3.13689	0.166138	0.083069	0.00668962	1.29326	1.29326	HIGH n-6/n-3 up vs Low n-6n-3
28792	17444304	NR_027874 // 0610040B10Rik // RIKEN cDNA 0610040B10 gene // 5 G2|5 // 67672 /// ENSMUST	0610040B10Rik	NR_027874		0.0061859	2.93497	0.147988	0.0739939	2.58723	0.0808438	0.0404219	0.0061859	1.27257	1.27257	HIGH n-6/n-3 up vs Low n-6n-3
28811	17444628	ENSMUST00000160075 // Bud31 // BUD31 homolog (yeast) // 5 G2|5 // 231889 /// NM_0010087	Bud31	ENSMUST00000160075		0.0116268	5.61614	0.125673	0.0628366	5.32631	0.102013	0.0510066	0.0116268	1.2225	1.2225	HIGH n-6/n-3 up vs Low n-6n-3
28812	17444640	NM_001291248 // Cpsf4 // cleavage and polyadenylation specific factor 4 // 5 G2|5 // 54	Cpsf4	NM_001291248		0.00249754	5.99301	0.0692805	0.0346402	5.72316	0.0832899	0.041645	0.00249754	1.20568	1.20568	HIGH n-6/n-3 up vs Low n-6n-3
28846	17444938	ENSMUST00000175023 // Gm23362 // predicted gene, 23362 // --- // ---	Gm23362	ENSMUST00000175023		0.0353343	3.36357	0.251	0.1255	3.88698	0.29453	0.147265	0.0353343	0.695727	-1.43735	HIGH n-6/n-3 down vs Low n-6n-3
28867	17445268	NM_026033 // Gatad1 // GATA zinc finger domain containing 1 // 5|5 A2 // 67210 /// ENSM	Gatad1	NM_026033		0.0377703	7.48689	0.149642	0.0748209	7.15236	0.202744	0.101372	0.0377703	1.26096	1.26096	HIGH n-6/n-3 up vs Low n-6n-3
28870	17445308	NM_020010 // Cyp51 // cytochrome P450, family 51 // 5 A2|5 2.3 cM // 13121 /// ENSMUST0	Cyp51	NM_020010		0.0065761	3.86759	0.225456	0.112728	3.21543	0.227759	0.113879	0.0065761	1.57152	1.57152	HIGH n-6/n-3 up vs Low n-6n-3
28871	17445325	NM_021457 // Fzd1 // frizzled homolog 1 (Drosophila) // 5 A1|5 2.61 cM // 14362 /// ENS	Fzd1	NM_021457		0.0271612	5.00791	0.171915	0.0859573	4.59785	0.223952	0.111976	0.0271612	1.32875	1.32875	HIGH n-6/n-3 up vs Low n-6n-3
28915	17445715	NM_001159555 // Cd36 // CD36 antigen // 5 A3|5 8.11 cM // 12491 /// NM_001159556 // Cd3	Cd36	NM_001159555		0.0254565	11.4674	0.160789	0.0803943	10.9528	0.801122	0.400561	0.254565	1.42864	1.42864	HIGH n-6/n-3 up vs Low n-6n-3
28946	17446093	ENSMUST00000083395 // Gm22054 // predicted gene, 22054 // --- // ---	Gm22054	ENSMUST00000083395		0.0432087	3.42018	0.638739	0.319369	4.38267	0.399646	0.199823	0.0432087	0.513173	-1.94866	HIGH n-6/n-3 down vs Low n-6n-3
28966	17446322	NM_145401 // Prkag2 // protein kinase, AMP-activated, gamma 2 non-catalytic subunit //	Prkag2	NM_145401		0.0351218	6.55921	0.20712	0.10356	6.24043	0.111635	0.0558174	0.0351218	1.24727	1.24727	HIGH n-6/n-3 up vs Low n-6n-3
28976	17446458	ENSMUST00000168875 // Gm21680 // predicted gene, 21680 // 5|5 // 100862368 /// ENSMUST0	Gm21680	ENSMUST00000168875		0.0054219	1.93021	0.138489	0.0692447	2.26358	0.0742502	0.0371251	0.0054219	0.793682	-1.25995	HIGH n-6/n-3 down vs Low n-6n-3
28978	17446474	ENSMUST00000079447 // Speer4a // spermatogenesis associated glutamate (E)-rich protein	Speer4a	ENSMUST00000079447		0.0267878	3.37229	0.18605	0.0930249	3.91562	0.322965	0.161483	0.0267878	0.686183	-1.45734	HIGH n-6/n-3 down vs Low n-6n-3
28999	17446669	NM_001014394 // Gpr113 // G protein-coupled receptor 113 // 5 B1|5 // 381628 /// XM_006	Gpr113	NM_001014394		0.0383897	2.28331	0.0500454	0.0250227	2.4013	0.0739454	0.0369727	0.0383897	0.921469	-1.08522	HIGH n-6/n-3 down vs Low n-6n-3
29015	17446853	NM_027901 // Gtf3c2 // general transcription factor IIIC, polypeptide 2, beta // 5 B1|5	Gtf3c2	NM_027901		0.0162441	6.3167	0.104338	0.0521692	5.92942	0.209609	0.104804	0.0162441	1.30792	1.30792	HIGH n-6/n-3 up vs Low n-6n-3
29021	17446981	NM_022424 // Fndc4 // fibronectin type III domain containing 4 // 5 B1|5 // 64339 /// E	Fndc4	NM_022424		0.0140779	4.02138	0.257725	0.128863	3.43278	0.227588	0.113794	0.0140779	1.50379	1.50379	HIGH n-6/n-3 up vs Low n-6n-3
29036	17447089	NM_001198859 // Ctbp1 // C-terminal binding protein 1 // 5 B1|5 17.52 cM // 13016 /// N	Ctbp1	NM_001198859		0.00354764	7.93463	0.164942	0.082471	7.43905	0.135877	0.0679384	0.00354764	1.40989	1.40989	HIGH n-6/n-3 up vs Low n-6n-3
29052	17447143	NM_026698 // Tmem129 // transmembrane protein 129 // 5 B2|5 // 68366 /// ENSMUST0000001	Tmem129	NM_026698		0.027374	4.3735	0.202179	0.101089	4.0729	0.0461991	0.0230995	0.027374	1.23166	1.23166	HIGH n-6/n-3 up vs Low n-6n-3
29078	17447446	NM_001170454 // Tada2b // transcriptional adaptor 2B // 5 B3|5 // 231151 /// ENSMUST000	Tada2b	NM_001170454		0.00193416	4.93475	0.0653603	0.0326802	5.23375	0.0934886	0.0467443	0.00193416	0.812819	-1.23029	HIGH n-6/n-3 down vs Low n-6n-3
29084	17447514	NM_008550 // Man2b2 // mannosidase 2, alpha B2 // 5|5 B2 // 17160 /// ENSMUST0000003100	Man2b2	NM_008550		0.0295706	5.55424	0.156346	0.0781728	5.26086	0.13507	0.067535	0.0295706	1.22551	1.22551	HIGH n-6/n-3 up vs Low n-6n-3
29098	17447696	ENSMUST00000104085 // Gm22779 // predicted gene, 22779 // --- // ---	Gm22779	ENSMUST00000104085		0.0291089	3.77715	0.0818828	0.0409414	4.10855	0.217504	0.108752	0.0291089	0.794765	-1.25823	HIGH n-6/n-3 down vs Low n-6n-3
29305	17449155	NM_007683 // Cenpc1 // centromere protein C1 // 5|5 E2-E5 // 12617 /// ENSMUST000000311	Cenpc1	NM_007683		0.000406936	4.34192	0.120897	0.0604483	3.86866	0.0583197	0.0291598	0.000406936	1.38824	1.38824	HIGH n-6/n-3 up vs Low n-6n-3
29451	17450180	NM_172405 // Fam175a // family with sequence similarity 175, member A // 5 E4|5 // 7068	Fam175a	NM_172405		0.0206565	5.47659	0.130838	0.0654189	5.0413	0.246728	0.123364	0.0206565	1.35218	1.35218	HIGH n-6/n-3 up vs Low n-6n-3
29473	17450515	NM_001039647 // Gbp11 // guanylate binding protein 11 // 5 E5|5 // 634650 /// ENSMUST00	Gbp11	NM_001039647		0.0336697	3.07431	0.288871	0.144436	2.64211	0.126366	0.0631831	0.0336697	1.34929	1.34929	HIGH n-6/n-3 up vs Low n-6n-3
29474	17450527	XM_001478495 // Rps15a-ps5 // ribosomal protein S15A, pseudogene 5 // 5 E5|5 // 1000423	Rps15a-ps5	XM_001478495		0.0463215	6.51469	0.160423	0.0802115	6.18653	0.207379	0.103689	0.0463215	1.25541	1.25541	HIGH n-6/n-3 up vs Low n-6n-3
29525	17451126	ENSMUST00000104066 // Gm26079 // predicted gene, 26079 // --- // --- /// ENSMUST0000012	Gm26079	ENSMUST00000104066		0.0390448	10.8115	0.307714	0.153857	10.1825	0.366145	0.183072	0.0390448	1.5465	1.5465	HIGH n-6/n-3 up vs Low n-6n-3
29541	17451345	NM_172884 // 2900026A02Rik // RIKEN cDNA 2900026A02 gene // 5 F|5 // 243219 /// ENSMUST	2900026A02Rik	NM_172884		0.00514093	3.65047	0.063829	0.0319145	3.3328	0.133582	0.0667909	0.00514093	1.24631	1.24631	HIGH n-6/n-3 up vs Low n-6n-3
29549	17451460	ENSMUST00000083386 // Gm22056 // predicted gene, 22056 // --- // ---	Gm22056	ENSMUST00000083386		0.0175257	2.05021	0.135325	0.0676626	2.34251	0.118728	0.059364	0.0175257	0.8166	-1.22459	HIGH n-6/n-3 down vs Low n-6n-3
29561	17451614	NM_181075 // 2610524H06Rik // RIKEN cDNA 2610524H06 gene // 5 F|5 // 330173 /// ENSMUST	2610524H06Rik	NM_181075		0.0209344	6.32716	0.254792	0.127396	5.75637	0.264768	0.132384	0.0209344	1.48534	1.48534	HIGH n-6/n-3 up vs Low n-6n-3
29616	17452097	NM_033541 // Oas1c // 2-5 oligoadenylate synthetase 1C // 5 F|5 60.64 cM // 114643 ///	Oas1c	NM_033541		0.0208347	2.86467	0.14876	0.0743802	2.48834	0.190839	0.0954197	0.0208347	1.29803	1.29803	HIGH n-6/n-3 up vs Low n-6n-3
29651	17452615	ENSMUST00000145152 // Diablo // diablo homolog (Drosophila) // 5 F|5 // 66593 /// BC024	Diablo	ENSMUST00000145152		0.0105519	5.99291	0.165867	0.0829335	5.65045	0.0864082	0.0432041	0.0105519	1.26792	1.26792	HIGH n-6/n-3 up vs Low n-6n-3
29654	17452672	NM_027494 // Zcchc8 // zinc finger, CCHC domain containing 8 // 5 F|5 // 70650 /// ENSM	Zcchc8	NM_027494		0.00496632	6.04232	0.116808	0.0584041	5.68949	0.11402	0.05701	0.00496632	1.27706	1.27706	HIGH n-6/n-3 up vs Low n-6n-3
29673	17452978	NM_019639 // Ubc // ubiquitin C // 5 G1.1|5 64.18 cM // 22190 /// ENSMUST00000136312 //	Ubc	NM_019639		0.0426889	4.72401	0.190853	0.0954265	4.42943	0.127997	0.0639987	0.0426889	1.22653	1.22653	HIGH n-6/n-3 up vs Low n-6n-3
29702	17453160	NM_010368 // Gusb // glucuronidase, beta // 5 G1.3|5 68.32 cM // 110006 /// ENSMUST0000	Gusb	NM_010368		0.0363443	6.65955	0.15691	0.0784551	6.32793	0.190907	0.0954533	0.0363443	1.25843	1.25843	HIGH n-6/n-3 up vs Low n-6n-3
29712	17453347	NM_001081462 // Gtf2ird1 // general transcription factor II I repeat domain-containing	Gtf2ird1	NM_001081462		0.0126631	4.15926	0.128472	0.0642358	3.84663	0.123362	0.0616808	0.0126631	1.24197	1.24197	HIGH n-6/n-3 up vs Low n-6n-3
29724	17453513	NM_025375 // Wbscr22 // Williams Beuren syndrome chromosome region 22 // 5 G2|5 // 6613	Wbscr22	NM_025375		0.0152792	4.98811	0.219285	0.109643	4.586	0.096404	0.048202	0.0152792	1.32144	1.32144	HIGH n-6/n-3 up vs Low n-6n-3
29731	17453607	NM_001013412 // Ccl26 // chemokine (C-C motif) ligand 26 // 5 G2|5 // 541307 /// ENSMUS	Ccl26	NM_001013412		0.0242784	2.55175	0.0393326	0.0196663	2.6574	0.0586694	0.0293347	0.0242784	0.929389	-1.07598	HIGH n-6/n-3 down vs Low n-6n-3
29779	17454250	NR_029787 // Mir25 // microRNA 25 // 5|5 // 723926 /// ENSMUST00000083460 // Mir25 // m	Mir25	NR_029787		0.0302992	3.28477	0.270052	0.135026	2.83398	0.170847	0.0854237	0.0302992	1.36679	1.36679	HIGH n-6/n-3 up vs Low n-6n-3
29825	17454836	NM_172726 // E130309D02Rik // RIKEN cDNA E130309D02 gene // 5 G2|5 // 231868 /// ENSMUS	E130309D02Rik	NM_172726		0.00412975	4.70969	0.153333	0.0766666	4.32156	0.0795273	0.0397636	0.00412975	1.3087	1.3087	HIGH n-6/n-3 up vs Low n-6n-3
29828	17454877	NM_029749 // Usp42 // ubiquitin specific peptidase 42 // 5 G2|5 82.5 cM // 76800 /// XM	Usp42	NM_029749		0.0102271	4.86519	0.163454	0.0817272	4.4641	0.143463	0.0717313	0.0102271	1.32051	1.32051	HIGH n-6/n-3 up vs Low n-6n-3
29830	17454908	NM_001172146 // Aimp2 // aminoacyl tRNA synthetase complex-interacting multifunctional	Aimp2	NM_001172146		0.0232221	4.81815	0.18118	0.0905898	4.47749	0.133698	0.0668488	0.0232221	1.26634	1.26634	HIGH n-6/n-3 up vs Low n-6n-3
29832	17454919	NM_177682 // Ccz1 // CCZ1 vacuolar protein trafficking and biogenesis associated // 5 G	Ccz1	NM_177682		0.0335897	6.48295	0.128581	0.0642907	6.20218	0.159268	0.0796338	0.0335897	1.21484	1.21484	HIGH n-6/n-3 up vs Low n-6n-3																							0	0	0
29869	17455418	NM_011908 // Ubl3 // ubiquitin-like 3 // 5|5 G2-3 // 24109 /// ENSMUST00000079324 // Ub	Ubl3	NM_011908		0.00516641	8.0153	0.0513718	0.0256859	7.67946	0.148024	0.0740118	0.00516641	1.26212	1.26212	HIGH n-6/n-3 up vs Low n-6n-3
29924	17455752	NM_001167750 // Ccdc132 // coiled-coil domain containing 132 // 6 A1|6 // 73288 /// NM_	Ccdc132	NM_001167750		0.00666579	5.12834	0.207328	0.103664	4.70007	0.0395975	0.0197988	0.00666579	1.34562	1.34562	HIGH n-6/n-3 up vs Low n-6n-3
29947	17456051	ENSMUST00000083096 // n-R5s160 // nuclear encoded rRNA 5S 160 // --- // ---	n-R5s160	ENSMUST00000083096		0.0149158	2.89667	0.218469	0.109234	3.48765	0.273468	0.136734	0.0149158	0.663892	-1.50627	HIGH n-6/n-3 down vs Low n-6n-3
30031	17456995	NM_013791 // Mkln1 // muskelin 1, intracellular mediator containing kelch motifs // 6|6	Mkln1	NM_013791		0.0144358	6.38933	0.0859534	0.0429767	6.06093	0.172786	0.0863928	0.0144358	1.25562	1.25562	HIGH n-6/n-3 up vs Low n-6n-3
30048	17457143	NM_172398 // Akr1b10 // aldo-keto reductase family 1, member B10 (aldose reductase) //	Akr1b10	NM_172398		0.0438828	5.19491	0.0751993	0.0375996	4.49398	0.54604	0.27302	0.0438828	1.62556	1.62556	HIGH n-6/n-3 up vs Low n-6n-3
30050	17457171	ENSMUST00000045372 // Bpgm // 2,3-bisphosphoglycerate mutase // 6 B1|6 // 12183 /// NM_	Bpgm	ENSMUST00000045372		0.0449499	5.41218	0.204223	0.102111	5.04199	0.210316	0.105158	0.0449499	1.29252	1.29252	HIGH n-6/n-3 up vs Low n-6n-3
30063	17457320	ENSMUST00000116686 // Gm25111 // predicted gene, 25111 // --- // ---	Gm25111	ENSMUST00000116686		0.00924291	2.5906	0.0733954	0.0366977	2.9081	0.151396	0.0756982	0.00924291	0.802457	-1.24617	HIGH n-6/n-3 down vs Low n-6n-3
30116	17457731	NM_011646 // Try4 // trypsin 4 // 6 B1|6 // 22074 /// ENSMUST00000031913 // Try4 // try	Try4	NM_011646		0.0150399	3.3504	0.112397	0.0561984	3.66794	0.151253	0.0756266	0.0150399	0.802438	-1.2462	HIGH n-6/n-3 down vs Low n-6n-3
30152	17457942	NM_001289617 // Zyx // zyxin // 6 B2.1|6 // 22793 /// NM_001289619 // Zyx // zyxin // 6	Zyx	NM_001289617		0.0374185	6.47377	0.171761	0.0858804	6.10754	0.214943	0.107472	0.0374185	1.28898	1.28898	HIGH n-6/n-3 up vs Low n-6n-3
30185	17458120	NM_146175 // Zfp282 // zinc finger protein 282 // 6 B2.3|6 // 101095 /// ENSMUST0000006	Zfp282	NM_146175		0.00857578	3.22157	0.0902538	0.0451269	2.94225	0.114179	0.0570896	0.00857578	1.21362	1.21362	HIGH n-6/n-3 up vs Low n-6n-3
30192	17458189	ENSMUST00000175344 // Gm24325 // predicted gene, 24325 // --- // ---	Gm24325	ENSMUST00000175344		0.0202299	4.75083	0.157763	0.0788815	5.0558	0.114008	0.0570041	0.0202299	0.809454	-1.2354	HIGH n-6/n-3 down vs Low n-6n-3
30196	17458315	NM_001110160 // Lrrc61 // leucine rich repeat containing 61 // 6 B2.3|6 // 243371 /// N	Lrrc61	NM_001110160		0.036371	3.27404	0.229742	0.114871	3.62286	0.121691	0.0608453	0.036371	0.785228	-1.27351	HIGH n-6/n-3 down vs Low n-6n-3
30216	17458454	NM_029353 // Malsu1 // mitochondrial assembly of ribosomal large subunit 1 // 6 B3|6 //	Malsu1	NM_029353		0.0216081	4.91678	0.122746	0.0613729	4.60696	0.159236	0.079618	0.0216081	1.23956	1.23956	HIGH n-6/n-3 up vs Low n-6n-3
30276	17458990	NM_133737 // Lancl2 // LanC (bacterial lantibiotic synthetase component C)-like 2 // 6|	Lancl2	NM_133737		0.0156423	4.92447	0.183626	0.091813	4.46596	0.204286	0.102143	0.0156423	1.37412	1.37412	HIGH n-6/n-3 up vs Low n-6n-3																							0	0	0
30306	17459291	ENSMUST00000103303 // Igkv1-135 // immunoglobulin kappa variable 1-135 // --- // --- //	Igkv1-135	ENSMUST00000103303		0.0425702	4.24125	0.902048	0.451024	5.52275	0.429029	0.214514	0.0425702	0.411367	-2.43092	HIGH n-6/n-3 down vs Low n-6n-3
30357	17459455	NM_017399 // Fabp1 // fatty acid binding protein 1, liver // 6 C1|6 32.14 cM // 14080 /	Fabp1	NM_017399		0.0284036	2.17555	0.0865409	0.0432704	2.53708	0.236545	0.118272	0.0284036	0.778341	-1.28478	HIGH n-6/n-3 down vs Low n-6n-3																							0	0	0
30357	17459455	NM_017399 // Fabp1 // fatty acid binding protein 1, liver // 6 C1|6 32.14 cM // 14080 /	Fabp1	NM_017399		0.0284036	2.17555	0.0865409	0.0432704	2.53708	0.236545	0.118272	0.0284036	0.778341	-1.28478	HIGH n-6/n-3 down vs Low n-6n-3
30403	17459870	NM_013586 // Loxl3 // lysyl oxidase-like 3 // 6 C3|6 35.94 cM // 16950 /// ENSMUST00000	Loxl3	NM_013586		0.0485394	4.17118	0.17433	0.0871648	3.61583	0.414751	0.207376	0.0485394	1.46952	1.46952	HIGH n-6/n-3 up vs Low n-6n-3
30404	17459888	NM_007517 // Aup1 // ancient ubiquitous protein 1 // 6 C3|6 35.94 cM // 11993 /// ENSMU	Aup1	NM_007517		0.0385102	7.39674	0.145492	0.0727458	7.0135	0.251173	0.125587	0.0385102	1.30427	1.30427	HIGH n-6/n-3 up vs Low n-6n-3
30423	17459947	NM_026744 // Mrpl53 // mitochondrial ribosomal protein L53 // 6|6 D1 // 68499 /// ENSMU	Mrpl53	NM_026744		0.0326801	7.13935	0.380287	0.190143	6.44668	0.326485	0.163242	0.0326801	1.61628	1.61628	HIGH n-6/n-3 up vs Low n-6n-3
30429	17460059	NM_145571 // Mob1a // MOB kinase activator 1A // 6 C3|6 // 232157 /// ENSMUST0000003865	Mob1a	NM_145571		0.0338458	6.22402	0.170247	0.0851234	5.867	0.197611	0.0988053	0.0338458	1.28078	1.28078	HIGH n-6/n-3 up vs Low n-6n-3
30470	17460548	ENSMUST00000095740 // E230015B07Rik // RIKEN cDNA E230015B07 gene // 6 D1|6 // 320001 /	E230015B07Rik	ENSMUST00000095740		0.0422998	2.50791	0.168321	0.0841603	2.23637	0.127678	0.0638389	0.0422998	1.2071	1.2071	HIGH n-6/n-3 up vs Low n-6n-3
30541	17461080	ENSMUST00000158444 // Gm22840 // predicted gene, 22840 // --- // ---	Gm22840	ENSMUST00000158444		0.0356037	2.53292	0.0902326	0.0451163	2.8888	0.247758	0.123879	0.0356037	0.781389	-1.27977	HIGH n-6/n-3 down vs Low n-6n-3
30545	17461112	ENSMUST00000089304 // Gm10234 // predicted gene 10234 // --- // ---	Gm10234	ENSMUST00000089304		0.0443284	1.6428	0.0428439	0.021422	1.93952	0.230066	0.115033	0.0443284	0.8141	-1.22835	HIGH n-6/n-3 down vs Low n-6n-3
30547	17461124	NM_022992 // Arl6ip5 // ADP-ribosylation factor-like 6 interacting protein 5 // 6 D3|6	Arl6ip5	NM_022992		0.0275925	7.04912	0.187556	0.0937781	6.56895	0.27392	0.13696	0.0275925	1.39491	1.39491	HIGH n-6/n-3 up vs Low n-6n-3
30599	17461798	ENSMUST00000035673 // Vhl // von Hippel-Lindau tumor suppressor // 6 E3|6 52.81 cM // 2	Vhl	ENSMUST00000035673		0.0146054	4.48425	0.165515	0.0827575	4.09075	0.162408	0.0812041	0.0146054	1.31358	1.31358	HIGH n-6/n-3 up vs Low n-6n-3
30612	17461942	NM_001127330 // Pparg // peroxisome proliferator activated receptor gamma // 6 E3-F1|6	Pparg	NM_001127330		0.0391886	8.06412	0.135277	0.0676386	7.87805	0.300483	0.150242	0.301886	1.13766	1.13766	HIGH n-6/n-3 up vs Low n-6n-3
30614	17461968	NM_023290 // Mkrn2 // makorin, ring finger protein, 2 // 6 E3|6 // 67027 /// ENSMUST000	Mkrn2	NM_023290		0.0351889	5.82282	0.225862	0.112931	5.48442	0.106956	0.0534779	0.0351889	1.26436	1.26436	HIGH n-6/n-3 up vs Low n-6n-3																							0	0	0
30631	17462149	NM_001012477 // Cxcl12 // chemokine (C-X-C motif) ligand 12 // 6 F1|6 54.81 cM // 20315	Cxcl12	NM_001012477		0.041151	7.49394	0.283342	0.141671	6.97298	0.28534	0.14267	0.041151	1.43492	1.43492	HIGH n-6/n-3 up vs Low n-6n-3
30677	17462719	NM_026267 // Necap1 // NECAP endocytosis associated 1 // 6 F2|6 // 67602 /// ENSMUST000	Necap1	NM_026267		0.0251752	5.47358	0.129957	0.0649786	5.12314	0.197615	0.0988075	0.0251752	1.27495	1.27495	HIGH n-6/n-3 up vs Low n-6n-3																							0	0	0
30700	17462905	NM_145130 // Lpcat3 // lysophosphatidylcholine acyltransferase 3 // 6 F2|6 59.17 cM //	Lpcat3	NM_145130		0.0328433	7.63368	0.110206	0.0551029	7.25724	0.2495	0.12475	0.0328433	1.29813	1.29813	HIGH n-6/n-3 up vs Low n-6n-3
30705	17462958	NM_013538 // Cdca3 // cell division cycle associated 3 // 6 F2|6 59.17 cM // 14793 ///	Cdca3	NM_013538		0.0152236	2.90939	0.13143	0.0657149	2.60862	0.121534	0.060767	0.0152236	1.2318	1.2318	HIGH n-6/n-3 up vs Low n-6n-3
30743	17463387	NM_026743 // Tspan11 // tetraspanin 11 // 6 F3|6 // 68498 /// ENSMUST00000032501 // Tsp	Tspan11	NM_026743		0.00190955	3.79281	0.102889	0.0514443	3.48862	0.053048	0.026524	0.00190955	1.23472	1.23472	HIGH n-6/n-3 up vs Low n-6n-3
30770	17463585	ENSMUST00000158758 // Gm24676 // predicted gene, 24676 // --- // ---	Gm24676	ENSMUST00000158758		0.0179159	3.09682	0.198351	0.0991753	2.70422	0.140571	0.0702853	0.0179159	1.31275	1.31275	HIGH n-6/n-3 up vs Low n-6n-3
30831	17463971	ENSMUST00000083948 // n-R5s168 // nuclear encoded rRNA 5S 168 // --- // ---	n-R5s168	ENSMUST00000083948		0.0290023	2.17756	0.181727	0.0908637	2.57498	0.210957	0.105478	0.0290023	0.75921	-1.31716	HIGH n-6/n-3 down vs Low n-6n-3
30832	17463973	NM_144920 // Plekha5 // pleckstrin homology domain containing, family A member 5 // 6 G	Plekha5	NM_144920		0.016559	4.99867	0.146404	0.0732021	4.70708	0.0996707	0.0498353	0.016559	1.22398	1.22398	HIGH n-6/n-3 up vs Low n-6n-3
30898	17464573	NM_009364 // Tfpi2 // tissue factor pathway inhibitor 2 // 6 A2|6 1.81 cM // 21789 ///	Tfpi2	NM_009364		0.0116305	4.8389	0.379195	0.189597	3.89201	0.368642	0.184321	0.0116305	1.92771	1.92771	HIGH n-6/n-3 up vs Low n-6n-3
30993	17465557	NM_017478 // Copg2 // coatomer protein complex, subunit gamma 2 // 6 A3.3|6 // 54160 //	Copg2	NM_017478		0.00332435	6.77475	0.145228	0.0726138	6.17259	0.211075	0.105538	0.00332435	1.51799	1.51799	HIGH n-6/n-3 up vs Low n-6n-3
31004	17465671	NM_025336 // Chchd3 // coiled-coil-helix-coiled-coil-helix domain containing 3 // 6|6 B	Chchd3	NM_025336		0.0228021	7.20634	0.249586	0.124793	6.77635	0.133161	0.0665806	0.0228021	1.34723	1.34723	HIGH n-6/n-3 up vs Low n-6n-3
31022	17465856	NM_008973 // Ptn // pleiotrophin // 6 B1|6 15.48 cM // 19242 /// ENSMUST00000101534 //	Ptn	NM_008973		0.04917	6.18651	0.213487	0.106743	5.66112	0.37012	0.18506	0.04917	1.43932	1.43932	HIGH n-6/n-3 up vs Low n-6n-3
31069	17466421	NM_001011528 // Olfr456 // olfactory receptor 456 // 6 B2.1|6 // 259144 /// BC139108 //	Olfr456	NM_001011528		0.00984504	2.4707	0.197134	0.098567	2.8931	0.112673	0.0563363	0.00984504	0.746179	-1.34016	HIGH n-6/n-3 down vs Low n-6n-3
31075	17466468	ENSMUST00000103301 // Gm20730 // predicted gene, 20730 // --- // ---	Gm20730	ENSMUST00000103301		0.0274607	2.51047	0.167866	0.0839332	2.21525	0.115659	0.0578293	0.0274607	1.22708	1.22708	HIGH n-6/n-3 up vs Low n-6n-3
31118	17466861	NR_045199 // Mira // mistral long non-coding RNA // 6 B3|6 // 100736249 /// XM_00650561	Mira	NR_045199		0.0211327	4.29189	0.244335	0.122168	3.80907	0.193313	0.0966564	0.0211327	1.39748	1.39748	HIGH n-6/n-3 up vs Low n-6n-3
31130	17466932	NM_025817 // Tril // TLR4 interactor with leucine-rich repeats // 6 B3|6 // 66873 /// E	Tril	NM_025817		0.0275975	3.55945	0.212766	0.106383	3.15159	0.185076	0.0925379	0.0275975	1.32672	1.32672	HIGH n-6/n-3 up vs Low n-6n-3
31152	17467128	NM_001252374 // Nt5c3 // 5-nucleotidase, cytosolic III // 6 B3|6 // 107569 /// XM_00650	Nt5c3	NM_001252374		0.0122253	4.46795	0.143505	0.0717524	4.09457	0.154648	0.0773239	0.0122253	1.29538	1.29538	HIGH n-6/n-3 up vs Low n-6n-3
31161	17467181	ENSMUST00000081186 // Vmn1r21 // vomeronasal 1 receptor 21 // 6 B3|6 // 171201 /// BC12	Vmn1r21	ENSMUST00000081186		0.0166097	2.41444	0.231676	0.115838	2.88893	0.171806	0.0859028	0.0166097	0.719719	-1.38943	HIGH n-6/n-3 down vs Low n-6n-3
31163	17467187	NM_134178 // Vmn1r22 // vomeronasal 1 receptor 22 // 6 B3|6 // 171196 /// ENSMUST000001	Vmn1r22	NM_134178		0.013048	2.51466	0.219419	0.10971	3.12176	0.270516	0.135258	0.013048	0.656514	-1.5232	HIGH n-6/n-3 down vs Low n-6n-3
31188	17467298	NM_001166719 // Vmn1r34 // vomeronasal 1 receptor 34 // 6 C1|6 // 546901 /// ENSMUST000	Vmn1r34	NM_001166719		0.0469959	3.12098	0.185005	0.0925024	2.85109	0.112544	0.0562721	0.0469959	1.20571	1.20571	HIGH n-6/n-3 up vs Low n-6n-3
31190	17467302	NM_134166 // Vmn1r36 // vomeronasal 1 receptor 36 // 6 C1|6 // 171184 /// ENSMUST000001	Vmn1r36	NM_134166		0.0487394	3.03168	0.381137	0.190568	4.27536	0.934009	0.467004	0.0487394	0.422292	-2.36803	HIGH n-6/n-3 down vs Low n-6n-3
31255	17467519	ENSMUST00000103378 // Igkv8-30 // immunoglobulin kappa chain variable 8-30 // 6 C1|6 //	Igkv8-30	ENSMUST00000103378		0.0250305	2.87531	0.300736	0.150368	2.27553	0.270068	0.135034	0.0250305	1.51549	1.51549	HIGH n-6/n-3 up vs Low n-6n-3
31321	17468102	NM_001083922 // Wbp1 // WW domain binding protein 1 // 6 C3|6 // 22377 /// NM_016757 //	Wbp1	NM_001083922		0.030369	5.08682	0.0982199	0.0491099	4.75642	0.212783	0.106391	0.030369	1.25736	1.25736	HIGH n-6/n-3 up vs Low n-6n-3
31335	17468250	ENSMUST00000014892 // Tex261 // testis expressed gene 261 // 6 C3|6 35.94 cM // 21766 /	Tex261	ENSMUST00000014892		0.0455899	6.56749	0.159234	0.079617	6.30376	0.136482	0.0682411	0.0455899	1.20058	1.20058	HIGH n-6/n-3 up vs Low n-6n-3
31392	17468690	NM_001109745 // Cnbp // cellular nucleic acid binding protein // 6|6 D1-D2 // 12785 ///	Cnbp	NM_001109745		0.0475516	9.45026	0.158335	0.0791677	8.92484	0.392311	0.196156	0.0475516	1.43936	1.43936	HIGH n-6/n-3 up vs Low n-6n-3
31395	17468705	NM_001293652 // Rab7 // RAB7, member RAS oncogene family // 6 D1|6 39.13 cM // 19349 //	Rab7	NM_001293652		0.0293171	8.99535	0.162942	0.0814711	8.42051	0.369565	0.184782	0.0293171	1.4895	1.4895	HIGH n-6/n-3 up vs Low n-6n-3
31443	17469121	NM_001081146 // Prickle2 // prickle homolog 2 (Drosophila) // 6 D1|6 // 243548 /// XM_0	Prickle2	NM_001081146		0.00925356	2.80684	0.120701	0.0603504	2.47459	0.128236	0.064118	0.00925356	1.25897	1.25897	HIGH n-6/n-3 up vs Low n-6n-3																							0	0	0
31452	17469274	NR_003643 // 1700123L14Rik // nucleoporin 50 pseudogene // 6 D3|6 // 78482 /// ENSMUST0	1700123L14Rik	NR_003643		0.0427444	2.37629	0.086007	0.0430035	2.72837	0.260948	0.130474	0.0427444	0.783454	-1.2764	HIGH n-6/n-3 down vs Low n-6n-3
31455	17469289	NM_175313 // Eogt // EGF domain-specific O-linked N-acetylglucosamine (GlcNAc) transfer	Eogt	NM_175313		0.00686453	5.22546	0.0856444	0.0428222	4.9476	0.107988	0.0539942	0.00686453	1.2124	1.2124	HIGH n-6/n-3 up vs Low n-6n-3
31490	17469636	NM_001167730 // Rad18 // RAD18 homolog (S. cerevisiae) // 6|6 F // 58186 /// ENSMUST000	Rad18	NM_001167730		0.00560335	4.63549	0.114893	0.0574465	4.36933	0.0525658	0.0262829	0.00560335	1.2026	1.2026	HIGH n-6/n-3 up vs Low n-6n-3
31499	17469739	NM_001033204 // Rpusd3 // RNA pseudouridylate synthase domain containing 3 // 6 E3|6 //	Rpusd3	NM_001033204		0.0297842	3.53393	0.104121	0.0520607	3.19594	0.214555	0.107278	0.0297842	1.26399	1.26399	HIGH n-6/n-3 up vs Low n-6n-3
31502	17469775	NM_175101 // Emc3 // ER membrane protein complex subunit 3 // 6 E3|6 // 66087 /// ENSMU	Emc3	NM_175101		0.0165439	7.33416	0.263606	0.131803	6.76333	0.225127	0.112564	0.0165439	1.48538	1.48538	HIGH n-6/n-3 up vs Low n-6n-3
31514	17469894	NM_029780 // Raf1 // v-raf-leukemia viral oncogene 1 // 6 C3|6 53.62 cM // 110157 /// E	Raf1	NM_029780		0.0211513	6.96245	0.125816	0.0629082	6.67241	0.138616	0.069308	0.0211513	1.22267	1.22267	HIGH n-6/n-3 up vs Low n-6n-3
31522	17469967	NM_026376 // Plxnd1 // plexin D1 // 6 E3|6 // 67784 /// ENSMUST00000015511 // Plxnd1 //	Plxnd1	NM_026376		0.000125992	7.05404	0.0473891	0.0236946	6.68164	0.0710938	0.0355469	0.000125992	1.2945	1.2945	HIGH n-6/n-3 up vs Low n-6n-3
31545	17470301	NM_197985 // Adipor2 // adiponectin receptor 2 // 6 F1|6 56.78 cM // 68465 /// ENSMUST0	Adipor2	NM_197985		0.0482333	8.90455	0.238042	0.119021	8.35781	0.372532	0.186266	0.0482333	1.46078	1.46078	HIGH n-6/n-3 up vs Low n-6n-3
31554	17470435	NM_144815 // Cecr5 // cat eye syndrome chromosome region, candidate 5 // 6 F1|6 56.95 c	Cecr5	NM_144815		0.000350866	5.17468	0.0520234	0.0260117	4.88967	0.0590048	0.0295024	0.000350866	1.21841	1.21841	HIGH n-6/n-3 up vs Low n-6n-3
31695	17471936	NM_001024705 // Prpmp5 // proline-rich protein MP5 // 6 G1|6 // 381832 /// ENSMUST00000	Prpmp5	NM_001024705		0.0134186	2.60836	0.182455	0.0912273	3.27376	0.338215	0.169107	0.0134186	0.630518	-1.586	HIGH n-6/n-3 down vs Low n-6n-3
31713	17472030	NM_001048054 // Dusp16 // dual specificity phosphatase 16 // 6 G1|6 65.77 cM // 70686 /	Dusp16	NM_001048054		0.0200214	4.23343	0.0864946	0.0432473	3.90393	0.191086	0.0955432	0.0200214	1.25658	1.25658	HIGH n-6/n-3 up vs Low n-6n-3
31729	17472192	NM_008597 // Mgp // matrix Gla protein // 6 G1|6 // 17313 /// ENSMUST00000032342 // Mgp	Mgp	NM_008597		0.0366366	7.46025	0.391702	0.195851	6.88818	0.170601	0.0853006	0.0366366	1.48665	1.48665	HIGH n-6/n-3 up vs Low n-6n-3
31757	17472536	NM_001044720 // Abcc9 // ATP-binding cassette, sub-family C (CFTR/MRP), member 9 // 6 G	Abcc9	NM_001044720		0.0266309	7.28634	0.0498766	0.0249383	6.9169	0.248075	0.124038	0.0266309	1.29185	1.29185	HIGH n-6/n-3 up vs Low n-6n-3
31809	17473161	NM_133190 // Cacng8 // calcium channel, voltage-dependent, gamma subunit 8 // 7 A1|7 1.	Cacng8	NM_133190		0.0426729	2.93885	0.171273	0.0856365	2.65401	0.141523	0.0707616	0.0426729	1.21828	1.21828	HIGH n-6/n-3 up vs Low n-6n-3
31811	17473171	NM_025348 // Ndufa3 // NADH dehydrogenase (ubiquinone) 1 alpha subcomplex, 3 // 7 A1|7	Ndufa3	NM_025348		0.0183998	9.35804	0.316537	0.158268	8.59087	0.358434	0.179217	0.0183998	1.70192	1.70192	HIGH n-6/n-3 up vs Low n-6n-3
31848	17473561	NM_133204 // Zscan5b // zinc finger and SCAN domain containing 5B // 7 A1|7 // 170734 /	Zscan5b	NM_133204		0.0139292	2.4435	0.0852825	0.0426413	2.71635	0.134169	0.0670845	0.0139292	0.827686	-1.20819	HIGH n-6/n-3 down vs Low n-6n-3
31869	17473688	NM_001013765 // Zscan4c // zinc finger and SCAN domain containing 4C // 7 A1|7 // 24510	Zscan4c	NM_001013765		0.0441366	2.27034	0.135998	0.067999	2.66546	0.279944	0.139972	0.0441366	0.760428	-1.31505	HIGH n-6/n-3 down vs Low n-6n-3
31925	17474157	NM_001039878 // Strn4 // striatin, calmodulin binding protein 4 // 7 A2|7 // 97387 ///	Strn4	NM_001039878		0.0499221	5.97335	0.18761	0.0938049	5.67773	0.152089	0.0760444	0.0499221	1.22741	1.22741	HIGH n-6/n-3 up vs Low n-6n-3
32159	17475916	NM_001195091 // Gm6537 // predicted gene 6537 // 7 A3|7 // 100504112 /// XM_006539435 /	Gm6537	NM_001195091		0.0452537	2.2297	0.0838393	0.0419197	2.55974	0.248096	0.124048	0.0452537	0.795515	-1.25705	HIGH n-6/n-3 down vs Low n-6n-3
32162	17475956	NM_177301 // Hnrnpl // heterogeneous nuclear ribonucleoprotein L // 7 A3|7 // 15388 ///	Hnrnpl	NM_177301		0.037336	8.74935	0.109127	0.0545635	8.45872	0.18896	0.0944802	0.037336	1.22317	1.22317	HIGH n-6/n-3 up vs Low n-6n-3
32181	17476219	NM_172740 // Zfp420 // zinc finger protein 420 // 7 B1|7 // 233058 /// ENSMUST000000576	Zfp420	NM_172740		0.0139487	2.83668	0.162076	0.081038	2.42786	0.174677	0.0873384	0.0139487	1.3276	1.3276	HIGH n-6/n-3 up vs Low n-6n-3
32193	17476317	NM_001081114 // Clip3 // CAP-GLY domain containing linker protein 3 // 7 B1|7 // 76686	Clip3	NM_001081114		0.0230934	4.77902	0.127228	0.0636141	4.41674	0.202456	0.101228	0.0230934	1.28545	1.28545	HIGH n-6/n-3 up vs Low n-6n-3
32262	17476866	NM_172298 // Tshz3 // teashirt zinc finger family member 3 // 7 B2|7 // 243931 /// XM_0	Tshz3	NM_172298		0.0354027	3.40488	0.245166	0.122583	3.02498	0.137361	0.0686806	0.0354027	1.30125	1.30125	HIGH n-6/n-3 up vs Low n-6n-3
32264	17476872	NM_001085385 // 1600014C10Rik // RIKEN cDNA 1600014C10 gene // 7|7 B1 // 72244 /// ENSM	1600014C10Rik	NM_001085385		0.0275825	4.94544	0.237786	0.118893	4.52114	0.171744	0.0858721	0.0275825	1.34192	1.34192	HIGH n-6/n-3 up vs Low n-6n-3
32265	17476877	ENSMUST00000179674 // Gm22638 // predicted gene, 22638 // --- // ---	Gm22638	ENSMUST00000179674		0.00330587	3.25434	0.403197	0.201598	4.42933	0.294617	0.147308	0.00330587	0.442888	-2.25791	HIGH n-6/n-3 down vs Low n-6n-3
32270	17476902	ENSMUST00000093724 // Gm26327 // predicted gene, 26327 // --- // ---	Gm26327	ENSMUST00000093724		0.0421997	3.51106	0.479728	0.239864	4.18886	0.218117	0.109058	0.0421997	0.625116	-1.5997	HIGH n-6/n-3 down vs Low n-6n-3
32283	17476959	ENSMUST00000163475 // 2610021A01Rik // RIKEN cDNA 2610021A01 gene // --- // --- /// XR_	2610021A01Rik	ENSMUST00000163475		0.0364413	3.85969	0.211847	0.105924	3.49682	0.168368	0.0841841	0.0364413	1.28599	1.28599	HIGH n-6/n-3 up vs Low n-6n-3
32284	17476970	XM_006541123 // Zfp788 // zinc finger protein 788 // 7 B3|7 // 67607 /// NM_023363 // Z	Zfp788	XM_006541123		0.0477658	2.63623	0.178503	0.0892514	2.34216	0.156047	0.0780234	0.0477658	1.22609	1.22609	HIGH n-6/n-3 up vs Low n-6n-3
32335	17477391	NM_010639 // Klk1 // kallikrein 1 // 7 B4|7 28.74 cM // 16612 /// ENSMUST00000075162 //	Klk1	NM_010639		0.00557024	2.92698	0.150451	0.0752256	2.50868	0.1292	0.0645999	0.00557024	1.33635	1.33635	HIGH n-6/n-3 up vs Low n-6n-3
32340	17477428	NM_001034115 // Shank1 // SH3/ankyrin domain gene 1 // 7 B4|7 // 243961 /// XM_00654086	Shank1	NM_001034115		0.00483827	2.28645	0.103627	0.0518133	2.02328	0.0626278	0.0313139	0.00483827	1.20011	1.20011	HIGH n-6/n-3 up vs Low n-6n-3
32355	17477619	NM_027376 // Fuz // fuzzy homolog (Drosophila) // 7 B2|7 28.99 cM // 70300 /// XM_00654	Fuz	NM_027376		0.00562148	5.25103	0.160958	0.080479	4.82323	0.124059	0.0620293	0.00562148	1.34518	1.34518	HIGH n-6/n-3 up vs Low n-6n-3
32358	17477655	NM_016849 // Irf3 // interferon regulatory factor 3 // 7|7 B2 // 54131 /// NR_045611 //	Irf3	NM_016849		0.00537576	4.21169	0.128606	0.0643028	3.86507	0.100286	0.050143	0.00537576	1.27157	1.27157	HIGH n-6/n-3 up vs Low n-6n-3
32401	17478201	NM_001291075 // Gtf2h1 // general transcription factor II H, polypeptide 1 // 7 B4|7 //	Gtf2h1	NM_001291075		0.0345337	6.43403	0.157426	0.0787129	6.04655	0.237176	0.118588	0.0345337	1.30811	1.30811	HIGH n-6/n-3 up vs Low n-6n-3
32435	17478745	NM_009728 // Atp10a // ATPase, class V, type 10A // 7 C|7 // 11982 /// XM_006540582 //	Atp10a	NM_009728		0.0152122	4.72059	0.151409	0.0757044	4.35664	0.154858	0.0774292	0.0152122	1.28694	1.28694	HIGH n-6/n-3 up vs Low n-6n-3
32437	17478785	NR_003376 // Gm7367 // 1110014K08Rik pseudogene // 7 C|7 // 664849	Gm7367	NR_003376		0.0212205	2.79626	0.188413	0.0942066	3.37784	0.325013	0.162506	0.0212205	0.668234	-1.49648	HIGH n-6/n-3 down vs Low n-6n-3
32464	17479075	NM_001168475 // Ttc23 // tetratricopeptide repeat domain 23 // 7 C|7 // 67009 /// NM_00	Ttc23	NM_001168475		0.0104535	2.73911	0.0988609	0.0494305	2.46353	0.113051	0.0565253	0.0104535	1.21048	1.21048	HIGH n-6/n-3 up vs Low n-6n-3
32490	17479317	NM_001291220 // Isg20 // interferon-stimulated protein // 7 D3|7 // 57444 /// NM_001113	Isg20	NM_001291220		0.0399389	4.9697	0.307443	0.153722	4.37989	0.330484	0.165242	0.0399389	1.50505	1.50505	HIGH n-6/n-3 up vs Low n-6n-3
32501	17479479	ENSMUST00000180715 // Gm26646 // predicted gene, 26646 // --- // ---	Gm26646	ENSMUST00000180715		0.0188978	3.21033	0.141709	0.0708543	3.53258	0.144234	0.0721169	0.0188978	0.799823	-1.25028	HIGH n-6/n-3 down vs Low n-6n-3
32503	17479485	ENSMUST00000103871 // Gm24541 // predicted gene, 24541 // --- // ---	Gm24541	ENSMUST00000103871		0.0456727	3.46244	0.446318	0.223159	4.54492	0.736595	0.368297	0.0456727	0.472214	-2.11768	HIGH n-6/n-3 down vs Low n-6n-3
32510	17479575	NM_001285997 // Prc1 // protein regulator of cytokinesis 1 // 7 D3|7 45.62 cM // 233406	Prc1	NM_001285997		0.0139382	5.18628	0.103944	0.0519721	4.52659	0.370123	0.185062	0.0139382	1.57974	1.57974	HIGH n-6/n-3 up vs Low n-6n-3
32569	17480102	NM_001040085 // Sytl2 // synaptotagmin-like 2 // 7 E1|7 // 83671 /// NM_001289583 // Sy	Sytl2	NM_001040085		0.0274248	3.84996	0.24458	0.12229	3.44592	0.134024	0.0670118	0.0274248	1.32321	1.32321	HIGH n-6/n-3 up vs Low n-6n-3
32577	17480216	NM_028243 // Prcp // prolylcarboxypeptidase (angiotensinase C) // 7|7 E2 // 72461 /// E	Prcp	NM_028243		0.0397398	7.28671	0.15434	0.0771698	7.01878	0.134542	0.067271	0.0397398	1.20408	1.20408	HIGH n-6/n-3 up vs Low n-6n-3
32579	17480233	NM_021427 // Fam181b // family with sequence similarity 181, member B // 7 E1|7 // 5823	Fam181b	NM_021427		0.0442083	3.36026	0.215057	0.107528	2.99622	0.189876	0.0949381	0.0442083	1.28702	1.28702	HIGH n-6/n-3 up vs Low n-6n-3
32588	17480327	NM_199035 // Alg8 // asparagine-linked glycosylation 8 (alpha-1,3-glucosyltransferase)	Alg8	NM_199035		0.0082777	4.66352	0.173894	0.086947	4.00741	0.291216	0.145608	0.0082777	1.57583	1.57583	HIGH n-6/n-3 up vs Low n-6n-3
32610	17480566	ENSMUST00000083377 // n-R5s156 // nuclear encoded rRNA 5S 156 // --- // ---	n-R5s156	ENSMUST00000083377		0.0315114	4.51419	0.381713	0.190856	5.08959	0.155676	0.077838	0.0315114	0.671101	-1.49009	HIGH n-6/n-3 down vs Low n-6n-3
32638	17480978	NM_025605 // Lamtor1 // late endosomal/lysosomal adaptor, MAPK and MTOR activator 1 //	Lamtor1	NM_025605		0.00848962	5.38384	0.102027	0.0510137	4.94209	0.205749	0.102875	0.00848962	1.35825	1.35825	HIGH n-6/n-3 up vs Low n-6n-3
32644	17481102	NM_009103 // Rrm1 // ribonucleotide reductase M1 // 7 E3|7 54.72 cM // 20133 /// ENSMUS	Rrm1	NM_009103		0.0397099	6.59132	0.183155	0.0915774	6.13331	0.298174	0.149087	0.0397099	1.37364	1.37364	HIGH n-6/n-3 up vs Low n-6n-3
32717	17481354	XM_006544290 // Olfr687 // olfactory receptor 687 // 7 E3|7 // 668035	Olfr687	XM_006544290		0.0133744	2.82413	0.16097	0.0804849	3.39556	0.287812	0.143906	0.0133744	0.672948	-1.486	HIGH n-6/n-3 down vs Low n-6n-3
32761	17481632	NM_146311 // Olfr510 // olfactory receptor 510 // 7 E3|7 // 258308 /// ENSMUST000000762	Olfr510	NM_146311		0.02751	2.43507	0.195117	0.0975587	2.84983	0.209825	0.104913	0.02751	0.750144	-1.33308	HIGH n-6/n-3 down vs Low n-6n-3
32764	17481640	NM_025344 // Eif3f // eukaryotic translation initiation factor 3, subunit F // 7 E3|7 /	Eif3f	NM_025344		0.0379256	8.67175	0.133004	0.0665022	8.34768	0.20503	0.102515	0.0379256	1.25186	1.25186	HIGH n-6/n-3 up vs Low n-6n-3
32775	17481725	NM_009281 // Zfp143 // zinc finger protein 143 // 7 E3-F1|7 57.7 cM // 20841 /// ENSMUS	Zfp143	NM_009281		0.0244284	5.4084	0.158091	0.0790456	5.13305	0.0949068	0.0474534	0.0244284	1.21029	1.21029	HIGH n-6/n-3 up vs Low n-6n-3
32778	17481770	NM_009627 // Adm // adrenomedullin // 7 F1|7 57.7 cM // 11535 /// ENSMUST00000033054 //	Adm	NM_009627		0.0436584	5.07814	0.252594	0.126297	4.53386	0.34473	0.172365	0.0436584	1.45829	1.45829	HIGH n-6/n-3 up vs Low n-6n-3
32797	17482079	XR_404462 // Sox6os // SRY (sex determining region Y)-box 6, opposite strand // 7 F1|7	Sox6os	XR_404462		0.0402547	4.43395	0.284297	0.142149	4.04561	0.0888551	0.0444275	0.0402547	1.30888	1.30888	HIGH n-6/n-3 up vs Low n-6n-3
32799	17482093	AK140810 // Gm10589 // predicted gene 10589 // --- // 100037281	Gm10589	AK140810		0.0389151	3.28713	0.159581	0.0797905	2.86759	0.275876	0.137938	0.0389151	1.3375	1.3375	HIGH n-6/n-3 up vs Low n-6n-3
32814	17482290	NM_178414 // Acsm4 // acyl-CoA synthetase medium-chain family member 4 // 7 F2|7 // 233	Acsm4	NM_178414		0.0463787	2.09438	0.0312756	0.0156378	2.17259	0.0541193	0.0270596	0.0463787	0.947234	-1.05571	HIGH n-6/n-3 down vs Low n-6n-3
32856	17482884	NM_025304 // Lcmt1 // leucine carboxyl methyltransferase 1 // 7 F3|7 // 30949 /// ENSMU	Lcmt1	NM_025304		0.0304644	5.87268	0.233203	0.116602	5.36081	0.278674	0.139337	0.0304644	1.42589	1.42589	HIGH n-6/n-3 up vs Low n-6n-3																							0	0	0
32887	17483220	NM_026638 // Cdipt // CDP-diacylglycerol--inositol 3-phosphatidyltransferase (phosphati	Cdipt	NM_026638		0.00380296	7.53133	0.115858	0.0579291	7.08371	0.157865	0.0789325	0.00380296	1.36379	1.36379	HIGH n-6/n-3 up vs Low n-6n-3																							0	0	0
32910	17483516	NM_009739 // Bckdk // branched chain ketoacid dehydrogenase kinase // 7 F3|7 // 12041 /	Bckdk	NM_009739		0.0347564	7.02134	0.196786	0.098393	6.58831	0.250683	0.125342	0.0347564	1.35007	1.35007	HIGH n-6/n-3 up vs Low n-6n-3
32928	17483840	ENSMUST00000083829 // Gm23847 // predicted gene, 23847 // --- // ---	Gm23847	ENSMUST00000083829		0.0387482	5.42319	0.239214	0.119607	5.79742	0.152969	0.0764845	0.0387482	0.771516	-1.29615	HIGH n-6/n-3 down vs Low n-6n-3																							0	0	0
33003	17484569	BC119308 // Olfr61 // olfactory receptor 61 // 7 F5|7 // 18362 /// BC119334 // Olfr61 /	Olfr61	BC119308		0.00690055	1.88791	0.0806316	0.0403158	2.16694	0.112689	0.0563445	0.00690055	0.824146	-1.21338	HIGH n-6/n-3 down vs Low n-6n-3
33032	17484907	NR_034049 // Snora52 // small nucleolar RNA, H/ACA box 52 // 7|7 // 100217419 /// ENSMU	Snora52	NR_034049		0.0360255	10.1902	0.154109	0.0770543	9.76556	0.275506	0.137753	0.0360255	1.34227	1.34227	HIGH n-6/n-3 up vs Low n-6n-3
33122	17485998	XR_391129 // LOC102640192 // uncharacterized LOC102640192 // --- // 102640192 /// ENSMU	LOC102640192	XR_391129		0.0429938	2.96779	0.140389	0.0701947	3.28301	0.202507	0.101253	0.0429938	0.803726	-1.2442	HIGH n-6/n-3 down vs Low n-6n-3
33151	17486152	NM_145577 // Zfp772 // zinc finger protein 772 // 7 A1|7 // 232855 /// ENSMUST000000744	Zfp772	NM_145577		0.0292583	2.23848	0.256397	0.128199	2.63352	0.105912	0.0529561	0.0292583	0.760472	-1.31497	HIGH n-6/n-3 down vs Low n-6n-3
33199	17486519	NM_134210 // Vmn1r81 // vomeronasal 1 receptor 81 // 7 A1|7 // 171244 /// ENSMUST000000	Vmn1r81	NM_134210		0.00907184	2.26343	0.0605633	0.0302817	2.54744	0.137088	0.0685438	0.00907184	0.821303	-1.21758	HIGH n-6/n-3 down vs Low n-6n-3
33224	17486683	ENSMUST00000098809 // Sult2a3 // sulfotransferase family 2A, dehydroepiandrosterone (DH	Sult2a3	ENSMUST00000098809		0.00668794	2.51727	0.0724962	0.0362481	3.82554	0.641172	0.320586	0.00668794	0.403805	-2.47644	HIGH n-6/n-3 down vs Low n-6n-3
33297	17487346	NM_019649 // Clptm1 // cleft lip and palate associated transmembrane protein 1 // 7 A3|	Clptm1	NM_019649		0.032993	7.76098	0.100068	0.0500339	7.48725	0.171522	0.085761	0.032993	1.20892	1.20892	HIGH n-6/n-3 up vs Low n-6n-3
33420	17488148	NR_037283 // Mir3101 // microRNA 3101 // 7|7 15.84 cM // 100526505 /// ENSMUST000001344	Mir3101	NR_037283		0.0487462	3.1805	0.458039	0.22902	2.46027	0.362646	0.181323	0.0487462	1.64745	1.64745	HIGH n-6/n-3 up vs Low n-6n-3
33424	17488176	ENSMUST00000148699 // Gm15567 // predicted gene 15567 // --- // ---	Gm15567	ENSMUST00000148699		0.00626972	2.61348	0.078912	0.039456	2.93735	0.13632	0.06816	0.00626972	0.798921	-1.25169	HIGH n-6/n-3 down vs Low n-6n-3
33429	17488292	NM_011116 // Pld3 // phospholipase D family, member 3 // 7 A3|7 // 18807 /// XM_0065396	Pld3	NM_011116		0.0213729	6.09526	0.169776	0.0848882	5.73299	0.161669	0.0808344	0.0213729	1.28545	1.28545	HIGH n-6/n-3 up vs Low n-6n-3
33446	17488501	NM_027470 // Pak4 // p21 protein (Cdc42/Rac)-activated kinase 4 // 7 A3|7 // 70584 ///	Pak4	NM_027470		0.00500739	4.11609	0.112818	0.0564092	3.77013	0.113924	0.056962	0.00500739	1.27099	1.27099	HIGH n-6/n-3 up vs Low n-6n-3
33461	17488792	NM_001033525 // Kcnk6 // potassium inwardly-rectifying channel, subfamily K, member 6 /	Kcnk6	NM_001033525		0.0367976	5.16298	0.309027	0.154514	4.69279	0.167691	0.0838456	0.0367976	1.3853	1.3853	HIGH n-6/n-3 up vs Low n-6n-3
33568	17489738	NM_026181 // Gpatch1 // G patch domain containing 1 // 7 B1|7 // 67471 /// ENSMUST00000	Gpatch1	NM_026181		0.0178553	4.47753	0.129142	0.0645712	4.15053	0.155749	0.0778746	0.0178553	1.25441	1.25441	HIGH n-6/n-3 up vs Low n-6n-3
33600	17489983	NR_040329 // A230077H06Rik // RIKEN cDNA A230077H06 gene // 7 B3|7 // 320210 /// AK0389	A230077H06Rik	NR_040329		0.00163458	2.16544	0.0975332	0.0487666	2.4717	0.0571317	0.0285658	0.00163458	0.808737	-1.2365	HIGH n-6/n-3 down vs Low n-6n-3																							0	0	0
33606	17490031	NM_001105056 // Vmn2r59 // vomeronasal 2, receptor 59 // 7 B3|7 // 628444 /// ENSMUST00	Vmn2r59	NM_001105056		0.0113516	2.82676	0.0521796	0.0260898	3.24635	0.227114	0.113557	0.0113516	0.74764	-1.33754	HIGH n-6/n-3 down vs Low n-6n-3
33625	17490180	ENSMUST00000072123 // Gm10109 // predicted gene 10109 // --- // --- /// AK131849 // Gm1	Gm10109	ENSMUST00000072123		0.0265653	3.66014	0.205169	0.102584	4.01975	0.136003	0.0680015	0.0265653	0.779371	-1.28309	HIGH n-6/n-3 down vs Low n-6n-3																							0	0	0
33640	17490417	NM_133949 // Ptov1 // prostate tumor over expressed gene 1 // 7 B2|7 // 84113 /// XR_39	Ptov1	NM_133949		0.00385519	7.20306	0.249071	0.124536	6.45281	0.215157	0.107578	0.00385519	1.68209	1.68209	HIGH n-6/n-3 up vs Low n-6n-3
33704	17491242	ENSMUST00000014546 // Tsg101 // tumor susceptibility gene 101 // 7|7 B5 // 22088 /// NM	Tsg101	ENSMUST00000014546		0.0348286	6.44408	0.101968	0.050984	6.1298	0.207761	0.103881	0.0348286	1.2434	1.2434	HIGH n-6/n-3 up vs Low n-6n-3
33729	17491417	NM_001115087 // Fancf // Fanconi anemia, complementation group F // 7 B5|7 // 100040608	Fancf	NM_001115087		0.0383291	3.01852	0.0980729	0.0490365	2.69918	0.220737	0.110368	0.0383291	1.24775	1.24775	HIGH n-6/n-3 up vs Low n-6n-3
33859	17492066	NM_009697 // Nr2f2 // nuclear receptor subfamily 2, group F, member 2 // 7 D1|7 38.66 c	Nr2f2	NM_009697		0.00175625	4.21065	0.121802	0.0609008	3.82065	0.0804759	0.0402379	0.00175625	1.3104	1.3104	HIGH n-6/n-3 up vs Low n-6n-3
33868	17492173	NR_033604 // Gm4971 // Smad nuclear interacting protein 1 pseudogene // 7 D2|7 // 24406	Gm4971	NR_033604		0.00479319	3.02246	0.0966192	0.0483096	2.74322	0.084292	0.042146	0.00479319	1.21356	1.21356	HIGH n-6/n-3 up vs Low n-6n-3
33879	17492244	NM_008746 // Ntrk3 // neurotrophic tyrosine kinase, receptor, type 3 // 7 D3|7 44.01 cM	Ntrk3	NM_008746		0.0196297	4.97625	0.161973	0.0809865	4.63012	0.147766	0.0738829	0.0196297	1.27114	1.27114	HIGH n-6/n-3 up vs Low n-6n-3
33892	17492406	NM_001113471 // Plin1 // perilipin 1 // 7 D3|7 // 103968 /// NM_175640 // Plin1 // peri	Plin1	NM_001113471		0.0718462	8.82977	0.298172	0.149086	8.38674	0.27562	0.13781	0.0718462	1.35946	1.35946	HIGH n-6/n-3 up vs Low n-6n-3
33905	17492549	NM_172903 // Man2a2 // mannosidase 2, alpha 2 // 7 D2|7 // 140481 /// ENSMUST0000009834	Man2a2	NM_172903		0.0339271	7.20165	0.164454	0.082227	6.81157	0.232972	0.116486	0.0339271	1.31046	1.31046	HIGH n-6/n-3 up vs Low n-6n-3
33909	17492644	NM_173863 // Crtc3 // CREB regulated transcription coactivator 3 // 7 D3|7 // 70461 ///	Crtc3	NM_173863		0.0486115	5.00504	0.139058	0.0695288	4.82969	0.0293307	0.0146653	0.0486115	1.12924	1.12924	HIGH n-6/n-3 up vs Low n-6n-3
33913	17492729	NM_019951 // Sec11a // SEC11 homolog A (S. cerevisiae) // 7 D3|7 // 56529 /// ENSMUST00	Sec11a	NM_019951		0.0221172	6.38212	0.19221	0.0961048	6.01288	0.145443	0.0727214	0.0221172	1.29167	1.29167	HIGH n-6/n-3 up vs Low n-6n-3
33921	17492847	NM_146193 // Btbd1 // BTB (POZ) domain containing 1 // 7 D1|7 // 83962 /// ENSMUST00000	Btbd1	NM_146193		0.0283634	8.36116	0.106237	0.0531184	7.94858	0.266982	0.133491	0.0283634	1.33107	1.33107	HIGH n-6/n-3 up vs Low n-6n-3
33931	17492905	NM_010551 // Il16 // interleukin 16 // 7 D2-D3|7 47.43 cM // 16170 /// XM_006507384 //	Il16	NM_010551		0.0238492	3.84699	0.0478132	0.0239066	3.57898	0.171838	0.0859192	0.0238492	1.20414	1.20414	HIGH n-6/n-3 up vs Low n-6n-3
33939	17493034	XM_884867 // Gm6155 // predicted pseudogene 6155 // 7 D3|7 // 620480	Gm6155	XM_884867		0.00123172	2.94722	0.0668706	0.0334353	3.40839	0.14657	0.0732849	0.00123172	0.726394	-1.37666	HIGH n-6/n-3 down vs Low n-6n-3
33975	17493292	NM_025460 // Tmem126a // transmembrane protein 126A // 7|7 E1 // 66271 /// ENSMUST00000	Tmem126a	NM_025460		0.018194	7.23202	0.191366	0.0956832	6.62858	0.322609	0.161305	0.018194	1.51933	1.51933	HIGH n-6/n-3 up vs Low n-6n-3
33998	17493436	NM_001177945 // Aamdc // adipogenesis associated Mth938 domain containing // 7 E2|7 //	Aamdc	NM_001177945		0.0414373	4.74985	0.22716	0.11358	4.42015	0.115848	0.0579238	0.0414373	1.25675	1.25675	HIGH n-6/n-3 up vs Low n-6n-3
34029	17493772	NM_153527 // Dnajb13 // DnaJ (Hsp40) related, subfamily B, member 13 // 7 E3|7 // 69387	Dnajb13	NM_153527		0.00235751	2.32586	0.0446069	0.0223035	2.64249	0.11747	0.0587352	0.00235751	0.802943	-1.24542	HIGH n-6/n-3 down vs Low n-6n-3
34096	17494228	ENSMUST00000023934 // Hbb-bt // hemoglobin, beta adult t chain // 7|7 // 101488143 ///	Hbb-bt	ENSMUST00000023934		0.00372004	2.55586	0.167801	0.0839003	2.11642	0.0919911	0.0459956	0.00372004	1.35608	1.35608	HIGH n-6/n-3 up vs Low n-6n-3
34100	17494254	NM_013618 // Olfr66 // olfactory receptor 66 // 7 E3|7 // 18367 /// ENSMUST00000079117	Olfr66	NM_013618		0.00169	1.85093	0.0398818	0.0199409	2.15302	0.104901	0.0524505	0.00169	0.811078	-1.23293	HIGH n-6/n-3 down vs Low n-6n-3
34196	17494772	NM_146425 // Olfr470 // olfactory receptor 470 // 7 E3|7 // 258417 /// ENSMUST000000847	Olfr470	NM_146425		0.0204051	2.55789	0.190782	0.0953909	2.23836	0.0732819	0.0366409	0.0204051	1.24792	1.24792	HIGH n-6/n-3 up vs Low n-6n-3
34239	17495097	NM_053247 // Lyve1 // lymphatic vessel endothelial hyaluronan receptor 1 // 7|7 F2 // 1	Lyve1	NM_053247		0.0476887	7.57782	0.387447	0.193724	6.71201	0.580257	0.290128	0.0476887	1.82235	1.82235	HIGH n-6/n-3 up vs Low n-6n-3
34259	17495297	NM_011965 // Psma1 // proteasome (prosome, macropain) subunit, alpha type 1 // 7 F1|7 5	Psma1	NM_011965		0.00650382	7.81516	0.0501996	0.0250998	7.46676	0.163247	0.0816233	0.00650382	1.27314	1.27314	HIGH n-6/n-3 up vs Low n-6n-3
34343	17496183	NM_010900 // Nfatc2ip // nuclear factor of activated T cells, cytoplasmic, calcineurin	Nfatc2ip	NM_010900		0.00987027	3.2373	0.136597	0.0682986	2.83815	0.165626	0.0828131	0.00987027	1.31873	1.31873	HIGH n-6/n-3 up vs Low n-6n-3
34384	17496657	NM_146202 // Zfp768 // zinc finger protein 768 // 7 F3|7 // 233890 /// ENSMUST000000607	Zfp768	NM_146202		0.0477764	4.5526	0.266668	0.133334	4.16571	0.16188	0.0809399	0.0477764	1.30758	1.30758	HIGH n-6/n-3 up vs Low n-6n-3
34391	17496713	NR_024331 // 1700008J07Rik // RIKEN cDNA 1700008J07 gene // 7 F3|7 // 629159	1700008J07Rik	NR_024331		0.0153422	4.75466	0.157527	0.0787634	4.44731	0.0936735	0.0468368	0.0153422	1.23744	1.23744	HIGH n-6/n-3 up vs Low n-6n-3
34415	17496920	NM_145955 // Mcmbp // MCM (minichromosome maintenance deficient) binding protein // 7 F	Mcmbp	NM_145955		0.0238101	6.51438	0.0817214	0.0408607	6.20953	0.185604	0.0928022	0.0238101	1.23529	1.23529	HIGH n-6/n-3 up vs Low n-6n-3
34443	17497246	NM_007400 // Adam12 // a disintegrin and metallopeptidase domain 12 (meltrin alpha) //	Adam12	NM_007400		0.00796791	5.31967	0.172145	0.0860723	4.87515	0.149281	0.0746406	0.00796791	1.36086	1.36086	HIGH n-6/n-3 up vs Low n-6n-3																							0	0	0
34468	17497554	NM_001286007 // Tubgcp2 // tubulin, gamma complex associated protein 2 // 7|7 F5 // 742	Tubgcp2	NM_001286007		0.0406578	5.45942	0.170394	0.0851968	5.15747	0.157834	0.078917	0.0406578	1.23281	1.23281	HIGH n-6/n-3 up vs Low n-6n-3
34472	17497612	NM_053119 // Echs1 // enoyl Coenzyme A hydratase, short chain, 1, mitochondrial // 7 F4	Echs1	NM_053119		0.0297637	9.19846	0.270181	0.13509	8.72221	0.199728	0.0998638	0.0297637	1.39113	1.39113	HIGH n-6/n-3 up vs Low n-6n-3
34562	17498502	NM_007631 // Ccnd1 // cyclin D1 // 7 F5|7 88.92 cM // 12443 /// ENSMUST00000093962 // C	Ccnd1	NM_007631		0.0142745	6.32652	0.0530539	0.0265269	6.05477	0.15017	0.0750851	0.0142745	1.20727	1.20727	HIGH n-6/n-3 up vs Low n-6n-3
34598	17498874	ENSMUST00000051687 // Gm1840 // predicted gene 1840 // --- // ---	Gm1840	ENSMUST00000051687		0.00361794	6.28542	0.204419	0.10221	5.61432	0.206489	0.103245	0.00361794	1.59228	1.59228	HIGH n-6/n-3 up vs Low n-6n-3
34604	17498892	NM_001081119 // Abhd13 // abhydrolase domain containing 13 // 8|8 A2 // 68904 /// NM_02	Abhd13	NM_001081119		0.0153721	4.91288	0.13611	0.0680552	4.56262	0.158549	0.0792745	0.0153721	1.27479	1.27479	HIGH n-6/n-3 up vs Low n-6n-3
34615	17499038	NM_001113517 // Arhgef7 // Rho guanine nucleotide exchange factor (GEF7) // 8 A1.1|8 //	Arhgef7	NM_001113517		0.000149764	3.80877	0.0671504	0.0335752	3.42791	0.0601026	0.0300513	0.000149764	1.30212	1.30212	HIGH n-6/n-3 up vs Low n-6n-3
34634	17499310	NM_001291765 // Tfdp1 // transcription factor Dp 1 // 8|8 A1-A3 // 21781 /// NM_0012917	Tfdp1	NM_001291765		0.0078525	7.05179	0.102374	0.0511869	6.55211	0.23388	0.11694	0.0078525	1.4139	1.4139	HIGH n-6/n-3 up vs Low n-6n-3
34638	17499353	NM_027276 // Cdc16 // CDC16 cell division cycle 16 // 8|8 A2 // 69957 /// XM_006508883	Cdc16	NM_027276		0.0136495	6.3481	0.150749	0.0753744	5.79674	0.281951	0.140975	0.0136495	1.46547	1.46547	HIGH n-6/n-3 up vs Low n-6n-3
34670	17499626	ENSMUST00000133001 // LOC101056094 // cadherin-11-like // --- // 101056094 /// ENSMUST0	LOC101056094	ENSMUST00000133001		0.0449446	5.8664	0.179703	0.0898517	5.48491	0.24284	0.12142	0.0449446	1.30269	1.30269	HIGH n-6/n-3 up vs Low n-6n-3
34702	17499796	NM_001177528 // Gm15315 // predicted gene 15315 // 8 A2|8 // 100041952 /// ENSMUST00000	Gm15315	NM_001177528		0.0324772	4.93547	0.170476	0.0852379	4.62934	0.140853	0.0704263	0.0324772	1.23639	1.23639	HIGH n-6/n-3 up vs Low n-6n-3
34709	17499828	NM_139224 // Defb35 // defensin beta 35 // 8 A2|8 // 246084 /// ENSMUST00000076786 // D	Defb35	NM_139224		0.0173593	2.17585	0.061298	0.030649	2.6405	0.278848	0.139424	0.0173593	0.724648	-1.37998	HIGH n-6/n-3 down vs Low n-6n-3
34744	17500188	NM_026032 // Lsm1 // LSM1 homolog, U6 small nuclear RNA associated (S. cerevisiae) // 8	Lsm1	NM_026032		0.0191676	4.15469	0.175337	0.0876685	3.8457	0.0843505	0.0421753	0.0191676	1.23885	1.23885	HIGH n-6/n-3 up vs Low n-6n-3
34763	17500391	NM_175136 // Rnf122 // ring finger protein 122 // 8 A3|8 // 68867 /// XM_006509189 // R	Rnf122	NM_175136		0.0147048	5.45594	0.276929	0.138464	4.86036	0.216544	0.108272	0.0147048	1.51108	1.51108	HIGH n-6/n-3 up vs Low n-6n-3
34774	17500468	NM_017374 // Ppp2cb // protein phosphatase 2 (formerly 2A), catalytic subunit, beta iso	Ppp2cb	NM_017374		0.0372218	7.90947	0.152617	0.0763087	7.55253	0.220012	0.110006	0.0372218	1.2807	1.2807	HIGH n-6/n-3 up vs Low n-6n-3
34795	17500626	NM_030254 // Tusc3 // tumor suppressor candidate 3 // 8|8 B1.2 // 80286 /// ENSMUST0000	Tusc3	NM_030254		0.0285734	6.58832	0.129544	0.064772	6.19365	0.243038	0.121519	0.0285734	1.31464	1.31464	HIGH n-6/n-3 up vs Low n-6n-3
34814	17500812	ENSMUST00000157687 // Gm26181 // predicted gene, 26181 // --- // ---	Gm26181	ENSMUST00000157687		0.0368732	2.17173	0.181138	0.090569	2.46597	0.12512	0.0625599	0.0368732	0.8155	-1.22624	HIGH n-6/n-3 down vs Low n-6n-3
34851	17501140	ENSMUST00000157144 // Gm23986 // predicted gene, 23986 // --- // ---	Gm23986	ENSMUST00000157144		0.0462985	2.00386	0.121015	0.0605073	2.36248	0.259664	0.129832	0.0462985	0.779909	-1.2822	HIGH n-6/n-3 down vs Low n-6n-3
34924	17501633	NM_008509 // Lpl // lipoprotein lipase // 8 B3.3|8 33.88 cM // 16956 /// ENSMUST0000001	Lpl	NM_008509		0.0371607	10.8655	0.195196	0.0975979	10.4946	0.743229	0.371615	0.371607	1.2932	1.2932	HIGH n-6/n-3 up vs Low n-6n-3
34953	17501976	NM_023627 // Isyna1 // myo-inositol 1-phosphate synthase A1 // 8 B3.3|8 // 71780 /// EN	Isyna1	NM_023627		0.0493238	5.10996	0.304734	0.152367	4.60864	0.271422	0.135711	0.0493238	1.41551	1.41551	HIGH n-6/n-3 up vs Low n-6n-3
34977	17502221	NM_028617 // Mvb12a // multivesicular body subunit 12A // 8|8 C1 // 73711 /// ENSMUST00	Mvb12a	NM_028617		0.0483092	5.73791	0.121207	0.0606037	5.32448	0.311716	0.155858	0.0483092	1.33185	1.33185	HIGH n-6/n-3 up vs Low n-6n-3
34981	17502280	NM_146211 // Glt25d1 // glycosyltransferase 25 domain containing 1 // 8 B3.3|8 // 23440	Glt25d1	NM_146211		0.046922	6.88035	0.145693	0.0728466	6.57912	0.192705	0.0963525	0.046922	1.23219	1.23219	HIGH n-6/n-3 up vs Low n-6n-3
34985	17502342	NM_133358 // Zfp617 // zinc finger protein 617 // 8 B3.3|8 // 170938 /// ENSMUST0000011	Zfp617	NM_133358		0.0303697	4.90564	0.321389	0.160695	4.40676	0.148089	0.0740447	0.0303697	1.41312	1.41312	HIGH n-6/n-3 up vs Low n-6n-3
34993	17502378	NM_001001491 // Tpm4 // tropomyosin 4 // 8 B3.3|8 // 326618 /// ENSMUST00000003575 // T	Tpm4	NM_001001491		0.0217818	5.55034	0.18756	0.0937799	5.03377	0.278655	0.139328	0.0217818	1.43054	1.43054	HIGH n-6/n-3 up vs Low n-6n-3
34994	17502390	NM_023126 // Rab8a // RAB8A, member RAS oncogene family // 8 B3.3|8 34.84 cM // 17274 /	Rab8a	NM_023126		0.0397108	7.27133	0.155751	0.0778754	6.96182	0.177943	0.0889716	0.0397108	1.23929	1.23929	HIGH n-6/n-3 up vs Low n-6n-3
34995	17502406	NM_197944 // Hsh2d // hematopoietic SH2 domain containing // 8 B3.3|8 // 209488 /// ENS	Hsh2d	NM_197944		0.0243173	2.46788	0.169002	0.084501	2.15059	0.128367	0.0641835	0.0243173	1.24599	1.24599	HIGH n-6/n-3 up vs Low n-6n-3
34998	17502423	NM_007456 // Ap1m1 // adaptor-related protein complex AP-1, mu subunit 1 // 8 B3.3|8 34	Ap1m1	NM_007456		0.0449157	6.22174	0.199056	0.0995281	5.93438	0.110175	0.0550873	0.0449157	1.2204	1.2204	HIGH n-6/n-3 up vs Low n-6n-3
35011	17502573	NM_010442 // Hmox1 // heme oxygenase (decycling) 1 // 8 C1|8 35.59 cM // 15368 /// ENSM	Hmox1	NM_010442		0.00992563	5.42098	0.07554	0.03777	4.94936	0.242493	0.121247	0.00992563	1.38667	1.38667	HIGH n-6/n-3 up vs Low n-6n-3
35023	17502714	NM_001009981 // Slc10a7 // solute carrier family 10 (sodium/bile acid cotransporter fam	Slc10a7	NM_001009981		0.0243036	5.13059	0.135525	0.0677627	4.8664	0.11336	0.0566799	0.0243036	1.20096	1.20096	HIGH n-6/n-3 up vs Low n-6n-3
35047	17502994	NM_181039 // Lphn1 // latrophilin 1 // 8 C3|8 // 330814 /// ENSMUST00000045393 // Lphn1	Lphn1	NM_181039		0.00163177	4.93999	0.0968835	0.0484418	4.65693	0.0389934	0.0194967	0.00163177	1.21677	1.21677	HIGH n-6/n-3 up vs Low n-6n-3
35068	17503245	NM_001168244 // Syce2 // synaptonemal complex central element protein 2 // 8 C3|8 // 71	Syce2	NM_001168244		0.017682	3.49027	0.0870551	0.0435276	3.1167	0.213513	0.106757	0.017682	1.29555	1.29555	HIGH n-6/n-3 up vs Low n-6n-3
35083	17503431	NM_001163791 // Orc6 // origin recognition complex, subunit 6 // 8 C3|8 // 56452 /// NM	Orc6	NM_001163791		0.00984006	5.97774	0.111595	0.0557976	5.69106	0.106249	0.0531244	0.00984006	1.21983	1.21983	HIGH n-6/n-3 up vs Low n-6n-3
35098	17503559	ENSMUST00000121097 // Cnep1r1 // CTD nuclear envelope phosphatase 1 regulatory subunit	Cnep1r1	ENSMUST00000121097		0.00728529	6.14493	0.21186	0.10593	5.65546	0.124989	0.0624944	0.00728529	1.40393	1.40393	HIGH n-6/n-3 up vs Low n-6n-3
35117	17503841	NM_173014 // Lpcat2 // lysophosphatidylcholine acyltransferase 2 // 8 C5|8 // 270084 //	Lpcat2	NM_173014		0.0241926	3.28458	0.242276	0.121138	2.88723	0.108394	0.054197	0.0241926	1.31708	1.31708	HIGH n-6/n-3 up vs Low n-6n-3
35148	17504242	NM_028805 // Katnb1 // katanin p80 (WD40-containing) subunit B 1 // 8 D1|8 // 74187 ///	Katnb1	NM_028805		0.00277937	4.40107	0.127165	0.0635825	4.06246	0.0558948	0.0279474	0.00277937	1.26454	1.26454	HIGH n-6/n-3 up vs Low n-6n-3
35222	17505114	NM_011764 // Zfp90 // zinc finger protein 90 // 8 D3|8 53.14 cM // 22751 /// XM_0065308	Zfp90	NM_011764		0.0167652	3.19674	0.210903	0.105451	2.80609	0.110302	0.055151	0.0167652	1.31099	1.31099	HIGH n-6/n-3 up vs Low n-6n-3
35231	17505225	NM_126165 // Vps4a // vacuolar protein sorting 4a (yeast) // 8|8 D // 116733 /// ENSMUS	Vps4a	NM_126165		0.0495749	6.58278	0.183964	0.091982	6.30292	0.134953	0.0674765	0.0495749	1.21407	1.21407	HIGH n-6/n-3 up vs Low n-6n-3
35236	17505283	NM_025830 // Wwp2 // WW domain containing E3 ubiquitin protein ligase 2 // 8 D3|8 // 66	Wwp2	NM_025830		0.0443963	4.48608	0.213254	0.106627	4.17185	0.126484	0.0632421	0.0443963	1.24335	1.24335	HIGH n-6/n-3 up vs Low n-6n-3
35254	17505599	NM_146216 // Vac14 // Vac14 homolog (S. cerevisiae) // 8 E1|8 57.59 cM // 234729 /// EN	Vac14	NM_146216		0.00996002	5.66341	0.0795092	0.0397546	5.35152	0.148106	0.0740531	0.00996002	1.24133	1.24133	HIGH n-6/n-3 up vs Low n-6n-3
35264	17505742	ENSMUST00000104289 // Gm24793 // predicted gene, 24793 // --- // ---	Gm24793	ENSMUST00000104289		0.00454642	2.38186	0.148022	0.0740111	1.99013	0.0986426	0.0493213	0.00454642	1.31197	1.31197	HIGH n-6/n-3 up vs Low n-6n-3
35289	17505967	NM_001163262 // Cmip // c-Maf inducing protein // 8 E1|8 // 74440 /// NM_028941 // Cmip	Cmip	NM_001163262		0.0238853	5.90154	0.119808	0.0599039	5.44261	0.281078	0.140539	0.0238853	1.37452	1.37452	HIGH n-6/n-3 up vs Low n-6n-3
35384	17506987	XM_006531564 // Gm6921 // predicted pseudogene 6921 // 8 E2|8 // 628847 /// ENSMUST0000	Gm6921	XM_006531564		0.0196243	2.33095	0.0826722	0.0413361	2.65182	0.185661	0.0928303	0.0196243	0.800587	-1.24908	HIGH n-6/n-3 down vs Low n-6n-3
35416	17507288	NM_011369 // Shcbp1 // Shc SH2-domain binding protein 1 // 8|8 A1.2 // 20419 /// ENSMUS	Shcbp1	NM_011369		0.00714497	3.40184	0.105197	0.0525983	2.89263	0.232077	0.116039	0.00714497	1.42327	1.42327	HIGH n-6/n-3 up vs Low n-6n-3
35466	17507788	ENSMUST00000157695 // Gm25665 // predicted gene, 25665 // --- // ---	Gm25665	ENSMUST00000157695		0.011606	3.71597	0.126763	0.0633815	3.3578	0.15463	0.0773148	0.011606	1.2818	1.2818	HIGH n-6/n-3 up vs Low n-6n-3																							0	0	0
35507	17508025	NM_001004140 // Ckap2 // cytoskeleton associated protein 2 // 8 A2|8 // 80986 /// XM_00	Ckap2	NM_001004140		0.0212295	4.10709	0.185077	0.0925387	3.67168	0.211822	0.105911	0.0212295	1.35229	1.35229	HIGH n-6/n-3 up vs Low n-6n-3
35544	17508416	NM_026121 // Bag4 // BCL2-associated athanogene 4 // 8|8 A3 // 67384 /// ENSMUST0000003	Bag4	NM_026121		0.00970109	5.53726	0.14319	0.0715952	5.2413	0.0680945	0.0340473	0.00970109	1.2277	1.2277	HIGH n-6/n-3 up vs Low n-6n-3
35635	17509274	NM_023503 // Ing2 // inhibitor of growth family, member 2 // 8|8 B2 // 69260 /// ENSMUS	Ing2	NM_023503		0.00255135	3.0438	0.125032	0.0625158	2.73258	0.010631	0.00531551	0.00255135	1.24076	1.24076	HIGH n-6/n-3 up vs Low n-6n-3
35703	17509923	NM_001167939 // Mau2 // MAU2 chromatid cohesion factor homolog (C. elegans) // 8|8 C1 /	Mau2	NM_001167939		0.0447287	6.48015	0.159754	0.0798771	6.06417	0.287542	0.143771	0.0447287	1.3342	1.3342	HIGH n-6/n-3 up vs Low n-6n-3																							0	0	0
35711	17510040	NM_001004062 // Crtc1 // CREB regulated transcription coactivator 1 // 8 B3.3|8 // 3820	Crtc1	NM_001004062		0.00886982	3.9064	0.244949	0.122475	3.41082	0.0877283	0.0438641	0.00886982	1.40988	1.40988	HIGH n-6/n-3 up vs Low n-6n-3
35724	17510200	NM_027560 // Arrdc2 // arrestin domain containing 2 // 8|8 C1 // 70807 /// ENSMUST00000	Arrdc2	NM_027560		0.0261598	3.57026	0.141461	0.0707305	3.29044	0.127975	0.0639874	0.0261598	1.21404	1.21404	HIGH n-6/n-3 up vs Low n-6n-3
35732	17510264	NM_001163042 // Haus8 // 4HAUS augmin-like complex, subunit 8 // 8|8 C1 // 76478 /// NM	Haus8	NM_001163042		0.0212305	4.05789	0.160698	0.0803489	3.722	0.145821	0.0729105	0.0212305	1.26215	1.26215	HIGH n-6/n-3 up vs Low n-6n-3
35744	17510422	NM_028189 // B3gnt3 // UDP-GlcNAc:betaGal beta-1,3-N-acetylglucosaminyltransferase 3 //	B3gnt3	NM_028189		0.0237134	3.56761	0.122604	0.0613019	3.15181	0.247624	0.123812	0.0237134	1.33403	1.33403	HIGH n-6/n-3 up vs Low n-6n-3
35755	17510542	NM_138585 // Cherp // calcium homeostasis endoplasmic reticulum protein // 8 B3.3|8 35.	Cherp	NM_138585		0.0111084	5.65383	0.0720544	0.0360272	5.22576	0.225319	0.112659	0.0111084	1.34544	1.34544	HIGH n-6/n-3 up vs Low n-6n-3																							0	0	0
35769	17510618	ENSMUST00000108740 // Gm10358 // predicted gene 10358 // --- // ---	Gm10358	ENSMUST00000108740		0.0340966	4.37843	0.441391	0.220696	3.76852	0.067335	0.0336675	0.0340966	1.52616	1.52616	HIGH n-6/n-3 up vs Low n-6n-3																							0	0	0
35778	17510667	NM_145599 // Tmem184c // transmembrane protein 184C // 8 C1|8 // 234463 /// XM_00653085	Tmem184c	NM_145599		0.0112513	6.02709	0.086999	0.0434995	5.57645	0.234124	0.117062	0.0112513	1.36665	1.36665	HIGH n-6/n-3 up vs Low n-6n-3
35825	17511134	NM_025788 // Nacc1 // nucleus accumbens associated 1, BEN and BTB (POZ) domain containi	Nacc1	NM_025788		0.00694064	5.64929	0.0710012	0.0355006	5.17565	0.224552	0.112276	0.00694064	1.38861	1.38861	HIGH n-6/n-3 up vs Low n-6n-3
35841	17511318	NM_022997 // Vps35 // vacuolar protein sorting 35 // 8 C3|8 41.61 cM // 65114 /// ENSMU	Vps35	NM_022997		0.0231916	7.43046	0.0558431	0.0279215	7.04588	0.247897	0.123948	0.0231916	1.30548	1.30548	HIGH n-6/n-3 up vs Low n-6n-3
35844	17511366	NM_019794 // Dnaja2 // DnaJ (Hsp40) homolog, subfamily A, member 2 // 8|8 C4 // 56445 /	Dnaja2	NM_019794		0.0246847	7.90928	0.0571236	0.0285618	7.59985	0.199773	0.0998865	0.0246847	1.23922	1.23922	HIGH n-6/n-3 up vs Low n-6n-3
35845	17511377	NM_001081324 // Neto2 // neuropilin (NRP) and tolloid (TLL)-like 2 // 8|8 C4 // 74513 /	Neto2	NM_001081324		0.033164	3.34508	0.171793	0.0858964	3.0161	0.166173	0.0830867	0.033164	1.25613	1.25613	HIGH n-6/n-3 up vs Low n-6n-3																							0	0	0
35860	17511548	ENSMUST00000158258 // Gm24212 // predicted gene, 24212 // --- // ---	Gm24212	ENSMUST00000158258		0.00809701	1.85688	0.0666099	0.0333049	2.19894	0.162872	0.0814362	0.00809701	0.788912	-1.26757	HIGH n-6/n-3 down vs Low n-6n-3
35873	17511643	NM_001013764 // Ces1a // carboxylesterase 1A // 8 C5|8 // 244595 /// ENSMUST00000095211	Ces1a	NM_001013764		0.0168832	1.85732	0.0560817	0.0280409	2.00834	0.0731418	0.0365709	0.0168832	0.900612	-1.11036	HIGH n-6/n-3 down vs Low n-6n-3
35877	17511714	NM_133660 // Ces1e // carboxylesterase 1E // 8 C5|8 45.11 cM // 13897 /// ENSMUST000000	Ces1e	NM_133660		0.0107772	2.04947	0.082004	0.041002	2.36771	0.154192	0.0770958	0.0107772	0.802049	-1.24681	HIGH n-6/n-3 down vs Low n-6n-3
35877	17511714	NM_133660 // Ces1e // carboxylesterase 1E // 8 C5|8 45.11 cM // 13897 /// ENSMUST000000	Ces1e	NM_133660		0.0107772	2.04947	0.082004	0.041002	2.36771	0.154192	0.0770958	0.0107772	0.802049	-1.24681	HIGH n-6/n-3 down vs Low n-6n-3
35886	17511825	NM_026623 // Nudt21 // nudix (nucleoside diphosphate linked moiety X)-type motif 21 //	Nudt21	NM_026623		0.0434076	6.16443	0.113632	0.0568161	5.89999	0.173361	0.0866804	0.0434076	1.20116	1.20116	HIGH n-6/n-3 up vs Low n-6n-3
35926	17512275	NM_144931 // Nae1 // NEDD8 activating enzyme E1 subunit 1 // 8 D3|8 // 234664 /// ENSMU	Nae1	NM_144931		0.0328881	6.35344	0.0954668	0.0477334	6.02845	0.215353	0.107676	0.0328881	1.25265	1.25265	HIGH n-6/n-3 up vs Low n-6n-3
35954	17512476	XM_006531547 // LOC102636686 // uncharacterized LOC102636686 // --- // 102636686 /// EN	LOC102636686	XM_006531547		0.0184971	3.69402	0.174593	0.0872963	3.40858	0.035468	0.017734	0.0184971	1.21879	1.21879	HIGH n-6/n-3 up vs Low n-6n-3
35971	17512657	NM_001007567 // Slc7a6os // solute carrier family 7, member 6 opposite strand // 8 D3|8	Slc7a6os	NM_001007567		0.0446871	5.04776	0.19706	0.09853	4.69172	0.200976	0.100488	0.0446871	1.27991	1.27991	HIGH n-6/n-3 up vs Low n-6n-3
35984	17512740	NM_026277 // Nob1 // NIN1/RPN12 binding protein 1 homolog (S. cerevisiae) // 8|8 D2 //	Nob1	NM_026277		0.0425872	5.78301	0.211914	0.105957	5.47171	0.11824	0.0591198	0.0425872	1.24082	1.24082	HIGH n-6/n-3 up vs Low n-6n-3
35997	17512852	ENSMUST00000122558 // Gm25321 // predicted gene, 25321 // --- // ---	Gm25321	ENSMUST00000122558		0.0447055	5.11439	0.523557	0.261779	6.78053	1.20882	0.604412	0.0447055	0.315094	-3.17366	HIGH n-6/n-3 down vs Low n-6n-3
36063	17513525	ENSMUST00000034278 // Gins2 // GINS complex subunit 2 (Psf2 homolog) // 8 E1|8 // 27255	Gins2	ENSMUST00000034278		0.0399665	4.50608	0.221821	0.11091	4.08214	0.23685	0.118425	0.0399665	1.34159	1.34159	HIGH n-6/n-3 up vs Low n-6n-3
36079	17513695	NR_015497 // Gm20735 // predicted gene, 20735 // 8 E1|8 // 319574	Gm20735	NR_015497		0.0231591	2.40169	0.13586	0.06793	2.71728	0.158094	0.0790468	0.0231591	0.803523	-1.24452	HIGH n-6/n-3 down vs Low n-6n-3
36081	17513705	NM_001033142 // Rnf166 // ring finger protein 166 // 8 E1|8 // 68718 /// XM_006531336 /	Rnf166	NM_001033142		0.0378849	4.3812	0.247329	0.123665	3.98814	0.163212	0.081606	0.0378849	1.31317	1.31317	HIGH n-6/n-3 up vs Low n-6n-3
36115	17514087	NM_175149 // 2310022B05Rik // RIKEN cDNA 2310022B05 gene // 8 E2|8 // 69551 /// ENSMUST	2310022B05Rik	NM_175149		0.0186464	5.5202	0.181936	0.0909678	5.12783	0.164654	0.0823271	0.0186464	1.31254	1.31254	HIGH n-6/n-3 up vs Low n-6n-3
36146	17514377	ENSMUST00000104060 // Gm23275 // predicted gene, 23275 // --- // ---	Gm23275	ENSMUST00000104060		0.0374344	2.7602	0.0991002	0.0495501	3.05459	0.197752	0.0988758	0.0374344	0.81542	-1.22636	HIGH n-6/n-3 down vs Low n-6n-3
36153	17514435	NM_007609 // Casp4 // caspase 4, apoptosis-related cysteine peptidase // 9 A1|9 2.46 cM	Casp4	NM_007609		0.00645319	3.26726	0.184787	0.0923937	2.867	0.0649906	0.0324953	0.00645319	1.31974	1.31974	HIGH n-6/n-3 up vs Low n-6n-3
36279	17515496	NM_175678 // Npsr1 // neuropeptide S receptor 1 // 9 A3-A4|9 // 319239 /// ENSMUST00000	Npsr1	NM_175678		0.0157228	2.27421	0.0974531	0.0487266	2.54779	0.132036	0.0660181	0.0157228	0.82726	-1.20881	HIGH n-6/n-3 down vs Low n-6n-3
36288	17515577	NM_178113 // Ncapd3 // non-SMC condensin II complex, subunit D3 // 9 A4|9 // 78658 ///	Ncapd3	NM_178113		0.0341237	4.88886	0.113606	0.0568032	4.52715	0.239249	0.119625	0.0341237	1.28494	1.28494	HIGH n-6/n-3 up vs Low n-6n-3
36381	17516257	NM_146326 // Olfr943 // olfactory receptor 943 // 9 A5|9 // 258323 /// ENSMUST000000716	Olfr943	NM_146326		0.0445428	2.65596	0.37923	0.189615	3.15416	0.104919	0.0524595	0.0445428	0.707992	-1.41245	HIGH n-6/n-3 down vs Low n-6n-3
36431	17516518	NM_023061 // Mcam // melanoma cell adhesion molecule // 9 A5.1|9 // 84004 /// ENSMUST00	Mcam	NM_023061		0.02267	7.89272	0.0875599	0.04378	7.35116	0.344812	0.172406	0.02267	1.45554	1.45554	HIGH n-6/n-3 up vs Low n-6n-3
36433	17516546	NM_007875 // Dpagt1 // dolichyl-phosphate (UDP-N-acetylglucosamine) acetylglucosamineph	Dpagt1	NM_007875		0.0460832	6.08501	0.172233	0.0861167	5.66024	0.291813	0.145906	0.0460832	1.34235	1.34235	HIGH n-6/n-3 up vs Low n-6n-3
36434	17516558	NM_010436 // H2afx // H2A histone family, member X // 9 A5.2|9 24.84 cM // 15270 /// EN	H2afx	NM_010436		0.0398871	7.48625	0.227159	0.11358	6.7521	0.513645	0.256822	0.0398871	1.66342	1.66342	HIGH n-6/n-3 up vs Low n-6n-3
36463	17516915	NM_080434 // Apoa5 // apolipoprotein A-V // 9|9 B // 66113 /// ENSMUST00000034584 // Ap	Apoa5	NM_080434		0.0150871	1.99141	0.0961291	0.0480645	2.16742	0.0410469	0.0205234	0.0150871	0.885153	-1.12975	HIGH n-6/n-3 down vs Low n-6n-3
36471	17516993	NM_011482 // Nhp2l1 // NHP2 non-histone chromosome protein 2-like 1 (S. cerevisiae) //	Nhp2l1	NM_011482		0.0431747	7.30037	0.172524	0.0862622	6.88736	0.273352	0.136676	0.0431747	1.33146	1.33146	HIGH n-6/n-3 up vs Low n-6n-3																							0	0	0
36513	17517368	NM_177350 // Gldn // gliomedin // 9 A5.3|9 // 235379 /// ENSMUST00000056740 // Gldn //	Gldn	NM_177350		0.010725	3.04579	0.131275	0.0656374	2.70952	0.129398	0.064699	0.010725	1.26248	1.26248	HIGH n-6/n-3 up vs Low n-6n-3
36545	17517727	NM_007747 // Cox5a // cytochrome c oxidase subunit Va // 9 B|9 // 12858 /// ENSMUST0000	Cox5a	NM_007747		0.0350152	9.27743	0.141867	0.0709337	8.80432	0.318765	0.159382	0.0350152	1.3881	1.3881	HIGH n-6/n-3 up vs Low n-6n-3
36588	17518227	NM_001033175 // Cln6 // ceroid-lipofuscinosis, neuronal 6 // 9 B|9 33.89 cM // 76524 //	Cln6	NM_001033175		0.0360548	5.26561	0.167306	0.0836532	4.84173	0.267084	0.133542	0.0360548	1.34153	1.34153	HIGH n-6/n-3 up vs Low n-6n-3
36613	17518458	NM_001290315 // Igdcc4 // immunoglobulin superfamily, DCC subclass, member 4 // 9 C|9 /	Igdcc4	NM_001290315		0.0185333	3.07951	0.123528	0.061764	2.78532	0.135969	0.0679843	0.0185333	1.22619	1.22619	HIGH n-6/n-3 up vs Low n-6n-3
36617	17518526	NM_001044389 // Clpx // caseinolytic mitochondrial matrix peptidase chaperone subunit /	Clpx	NM_001044389		0.0186016	6.97346	0.184004	0.0920022	6.63235	0.107684	0.0538419	0.0186016	1.26673	1.26673	HIGH n-6/n-3 up vs Low n-6n-3
36687	17519481	NM_010313 // Gnb5 // guanine nucleotide binding protein (G protein), beta 5 // 9 D|9 42	Gnb5	NM_010313		0.0465762	5.19494	0.104342	0.0521708	4.83457	0.268848	0.134424	0.0465762	1.28376	1.28376	HIGH n-6/n-3 up vs Low n-6n-3
36700	17519598	NM_134255 // Elovl5 // ELOVL family member 5, elongation of long chain fatty acids (yea	Elovl5	NM_134255		0.0354544	7.77271	0.135455	0.0677273	7.51633	0.132855	0.0664273	0.0354544	1.19448	1.19448	HIGH n-6/n-3 up vs Low n-6n-3
36745	17520043	NM_024195 // Cyb5r4 // cytochrome b5 reductase 4 // 9 E3.1|9 // 266690 /// ENSMUST00000	Cyb5r4	NM_024195		0.00677053	6.53796	0.0688174	0.0344087	6.26723	0.11485	0.057425	0.00677053	1.20642	1.20642	HIGH n-6/n-3 up vs Low n-6n-3
36759	17520167	XR_379689 // LOC102632389 // uncharacterized LOC102632389 // --- // 102632389 /// XR_37	LOC102632389	XR_379689		0.0292331	10.085	0.259971	0.129985	9.33002	0.461915	0.230958	0.0292331	1.68759	1.68759	HIGH n-6/n-3 up vs Low n-6n-3
36831	17520886	NM_001042607 // Ryk // receptor-like tyrosine kinase // 9 F1|9 54.72 cM // 20187 /// NM	Ryk	NM_001042607		0.0374476	6.93449	0.181898	0.0909489	6.44618	0.318686	0.159343	0.0374476	1.40281	1.40281	HIGH n-6/n-3 up vs Low n-6n-3
36855	17521159	NM_011876 // Twf2 // twinfilin, actin-binding protein, homolog 2 (Drosophila) // 9 F1|9	Twf2	NM_011876		0.00721955	7.35997	0.232742	0.116371	6.67728	0.251132	0.125566	0.00721955	1.60513	1.60513	HIGH n-6/n-3 up vs Low n-6n-3
36872	17521300	NM_009895 // Cish // cytokine inducible SH2-containing protein // 9 F1|9 57.99 cM // 12	Cish	NM_009895		0.0212191	3.62427	0.249147	0.124574	2.97307	0.338918	0.169459	0.0212191	1.57047	1.57047	HIGH n-6/n-3 up vs Low n-6n-3
36880	17521422	NM_010489 // Hyal2 // hyaluronoglucosaminidase 2 // 9 F1|9 58.12 cM // 15587 /// XM_006	Hyal2	NM_010489		0.0433855	4.05495	0.21418	0.10709	3.46628	0.408653	0.204327	0.0433855	1.50386	1.50386	HIGH n-6/n-3 up vs Low n-6n-3
36897	17521621	NM_177275 // Amigo3 // adhesion molecule with Ig like domain 3 // 9 F2|9 // 320844 ///	Amigo3	NM_177275		0.014298	2.91982	0.0956064	0.0478032	2.62738	0.142328	0.0711642	0.014298	1.22471	1.22471	HIGH n-6/n-3 up vs Low n-6n-3
36972	17522761	NM_146229 // Dync1li1 // dynein cytoplasmic 1 light intermediate chain 1 // 9 F3|9 // 2	Dync1li1	NM_146229		0.00817165	6.33186	0.123782	0.0618911	6.00841	0.111704	0.0558518	0.00817165	1.25132	1.25132	HIGH n-6/n-3 up vs Low n-6n-3
37057	17523668	AK136247 // Nlrp4g // NLR family, pyrin domain containing 4G // 9|9 // 235779	Nlrp4g	AK136247		0.0287147	2.02139	0.0723027	0.0361513	2.37071	0.233128	0.116564	0.0287147	0.784954	-1.27396	HIGH n-6/n-3 down vs Low n-6n-3
37059	17523676	ENSMUST00000181957 // Gm26870 // predicted gene, 26870 // --- // ---	Gm26870	ENSMUST00000181957		0.00606726	2.35244	0.145593	0.0727964	3.69956	0.634021	0.317011	0.00606726	0.393074	-2.54405	HIGH n-6/n-3 down vs Low n-6n-3																							0	0	0
37066	17523734	ENSMUST00000083448 // Gm23097 // predicted gene, 23097 // --- // ---	Gm23097	ENSMUST00000083448		0.0155805	2.53219	0.215595	0.107798	2.92805	0.0982456	0.0491228	0.0155805	0.760038	-1.31572	HIGH n-6/n-3 down vs Low n-6n-3
37088	17524087	NM_019683 // Ankrd49 // ankyrin repeat domain 49 // 9|9 A3 // 56503 /// XM_006510503 //	Ankrd49	NM_019683		0.00600132	4.86153	0.077323	0.0386615	4.47392	0.169974	0.0849872	0.00600132	1.30823	1.30823	HIGH n-6/n-3 up vs Low n-6n-3
37121	17524368	NM_001004190 // Zfp560 // zinc finger protein 560 // 9 A3|9 // 434377 /// ENSMUST000000	Zfp560	NM_001004190		0.0229834	3.54966	0.250807	0.125403	3.13616	0.106776	0.053388	0.0229834	1.33191	1.33191	HIGH n-6/n-3 up vs Low n-6n-3
37129	17524515	NM_145154 // Angptl6 // angiopoietin-like 6 // 9 A3|9 // 70726 /// ENSMUST00000043726 /	Angptl6	NM_145154		0.00205578	3.33134	0.10436	0.0521801	3.02578	0.0550622	0.0275311	0.00205578	1.2359	1.2359	HIGH n-6/n-3 up vs Low n-6n-3
37168	17524969	NM_028390 // Anln // anillin, actin binding protein // 9|9 A4 // 68743 /// XM_006510581	Anln	NM_028390		0.0172808	4.61099	0.204362	0.102181	4.02727	0.294272	0.147136	0.0172808	1.49871	1.49871	HIGH n-6/n-3 up vs Low n-6n-3
37175	17525075	NM_020586 // Herpud2 // HERPUD family member 2 // 9 A4|9 // 80517 /// ENSMUST0000000857	Herpud2	NM_020586		0.023381	6.9806	0.121482	0.060741	6.5517	0.256688	0.128344	0.023381	1.3462	1.3462	HIGH n-6/n-3 up vs Low n-6n-3
37183	17525186	NM_023277 // Jam3 // junction adhesion molecule 3 // 9 A4|9 // 83964 /// XM_006510715 /	Jam3	NM_023277		0.0472546	4.54808	0.423738	0.211869	3.99675	0.129519	0.0647594	0.0472546	1.46543	1.46543	HIGH n-6/n-3 up vs Low n-6n-3																							0	0	0
37202	17525363	NM_001291448 // Foxred1 // FAD-dependent oxidoreductase domain containing 1 // 9 A4|9 /	Foxred1	NM_001291448		0.00164143	6.15803	0.186627	0.0933133	5.64634	0.0299263	0.0149632	0.00164143	1.42572	1.42572	HIGH n-6/n-3 up vs Low n-6n-3
37208	17525418	NM_029762 // Hyls1 // hydrolethalus syndrome 1 // 9 A4|9 // 76832 /// ENSMUST0000011511	Hyls1	NM_029762		0.0404816	3.72895	0.14112	0.0705598	3.44496	0.166385	0.0831923	0.0404816	1.21755	1.21755	HIGH n-6/n-3 up vs Low n-6n-3
37295	17526120	ENSMUST00000056328 // Rnf26 // ring finger protein 26 // 9 A5.1|9 // 213211 /// ENSMUST	Rnf26	ENSMUST00000056328		0.00342164	5.01144	0.181599	0.0907993	4.46908	0.144603	0.0723016	0.00342164	1.45635	1.45635	HIGH n-6/n-3 up vs Low n-6n-3
37296	17526127	ENSMUST00000180670 // Gm10687 // predicted gene 10687 // --- // 100038560 /// AK143007	Gm10687	ENSMUST00000180670		0.0241721	4.92657	0.210038	0.105019	4.57861	0.0994155	0.0497078	0.0241721	1.27276	1.27276	HIGH n-6/n-3 up vs Low n-6n-3
37300	17526175	NM_138955 // Abcg4 // ATP-binding cassette, sub-family G (WHITE), member 4 // 9|9 A5.3	Abcg4	NM_138955		0.0185891	2.39624	0.044506	0.022253	2.18224	0.126112	0.0630562	0.0185891	1.15991	1.15991	HIGH n-6/n-3 up vs Low n-6n-3
37304	17526242	NM_027889 // Vps11 // vacuolar protein sorting 11 (yeast) // 9|9 B // 71732 /// ENSMUST	Vps11	NM_027889		0.0323088	6.10439	0.148461	0.0742307	5.80544	0.156399	0.0781995	0.0323088	1.23025	1.23025	HIGH n-6/n-3 up vs Low n-6n-3
37339	17526550	ENSMUST00000162209 // Gm16536 // predicted gene 16536 // --- // ---	Gm16536	ENSMUST00000162209		0.0274906	4.04958	0.115767	0.0578834	3.739	0.180592	0.090296	0.0274906	1.2402	1.2402	HIGH n-6/n-3 up vs Low n-6n-3
37366	17526813	NM_011220 // Pts // 6-pyruvoyl-tetrahydropterin synthase // 9 A5.3|9 // 19286 /// ENSMU	Pts	NM_011220		0.0321009	6.67613	0.290553	0.145277	6.24211	0.115091	0.0575457	0.0321009	1.35099	1.35099	HIGH n-6/n-3 up vs Low n-6n-3
37391	17527123	NM_144784 // Acat1 // acetyl-Coenzyme A acetyltransferase 1 // 9 C-D|9 29.12 cM // 1104	Acat1	NM_144784		0.0314366	9.7228	0.238816	0.119408	9.14236	0.340108	0.170054	0.0314366	1.4953	1.4953	HIGH n-6/n-3 up vs Low n-6n-3
37416	17527453	NM_198673 // Odf3l1 // outer dense fiber of sperm tails 3-like 1 // 9 B|9 // 382075 ///	Odf3l1	NM_198673		0.00717031	3.06745	0.11506	0.0575298	2.6729	0.160629	0.0803144	0.00717031	1.31453	1.31453	HIGH n-6/n-3 up vs Low n-6n-3
37421	17527481	NM_028347 // Neil1 // nei endonuclease VIII-like 1 (E. coli) // 9|9 C // 72774 /// XM_0	Neil1	NM_028347		0.0150277	4.36273	0.394435	0.197217	3.641	0.166727	0.0833636	0.0150277	1.64916	1.64916	HIGH n-6/n-3 up vs Low n-6n-3
37422	17527495	NM_025417 // Commd4 // COMM domain containing 4 // 9|9 C // 66199 /// ENSMUST0000006535	Commd4	NM_025417		0.0450713	6.6778	0.314433	0.157217	6.11231	0.319359	0.159679	0.0450713	1.47989	1.47989	HIGH n-6/n-3 up vs Low n-6n-3																							0	0	0
37428	17527542	NM_146223 // Cplx3 // complexin 3 // 9 B|9 // 235415 /// ENSMUST00000045068 // Cplx3 //	Cplx3	NM_146223		0.00464279	2.4328	0.0581024	0.0290512	2.70859	0.111565	0.0557825	0.00464279	0.825996	-1.21066	HIGH n-6/n-3 down vs Low n-6n-3
37461	17527934	NM_024245 // Kif23 // kinesin family member 23 // 9 B|9 // 71819 /// ENSMUST00000034815	Kif23	NM_024245		0.00121633	4.64283	0.057775	0.0288875	4.01414	0.211336	0.105668	0.00121633	1.54617	1.54617	HIGH n-6/n-3 up vs Low n-6n-3
37474	17528079	NM_027090 // 2300009A05Rik // RIKEN cDNA 2300009A05 gene // 9|9 D // 69478 /// ENSMUST0	2300009A05Rik	NM_027090		0.0199451	6.24146	0.504615	0.252307	5.32085	0.296899	0.148449	0.0199451	1.89292	1.89292	HIGH n-6/n-3 up vs Low n-6n-3
37521	17528586	NM_007630 // Ccnb2 // cyclin B2 // 9 D|9 // 12442 /// ENSMUST00000034742 // Ccnb2 // cy	Ccnb2	NM_007630		0.0171861	5.28436	0.0586887	0.0293443	4.33723	0.577566	0.288783	0.0171861	1.92803	1.92803	HIGH n-6/n-3 up vs Low n-6n-3
37523	17528615	ENSMUST00000083236 // Gm23730 // predicted gene, 23730 // --- // ---	Gm23730	ENSMUST00000083236		0.0233197	6.6954	0.461675	0.230838	7.47429	0.229074	0.114537	0.0233197	0.582815	-1.71581	HIGH n-6/n-3 down vs Low n-6n-3
37524	17528617	NM_172772 // Fam63b // family with sequence similarity 63, member B // 9 D|9 // 235461	Fam63b	NM_172772		0.0123166	5.38796	0.073164	0.036582	5.04864	0.177581	0.0887903	0.0123166	1.26516	1.26516	HIGH n-6/n-3 up vs Low n-6n-3
37531	17528714	NM_001253862 // Tcf12 // transcription factor 12 // 9 D|9 39.85 cM // 21406 /// NM_0115	Tcf12	NM_001253862		0.034773	6.19769	0.0821004	0.0410502	5.85162	0.241129	0.120565	0.034773	1.27109	1.27109	HIGH n-6/n-3 up vs Low n-6n-3
37546	17528836	NM_015806 // Mapk6 // mitogen-activated protein kinase 6 // 9 D|9 42.3 cM // 50772 ///	Mapk6	NM_015806		0.01047	6.07073	0.22493	0.112465	5.6511	0.0416997	0.0208498	0.01047	1.33759	1.33759	HIGH n-6/n-3 up vs Low n-6n-3																							0	0	0
37549	17528878	NM_001164790 // Scg3 // secretogranin III // 9 D|9 42.32 cM // 20255 /// NM_009130 // S	Scg3	NM_001164790		0.00651232	4.39428	0.0892615	0.0446307	4.02854	0.155557	0.0777786	0.00651232	1.28855	1.28855	HIGH n-6/n-3 up vs Low n-6n-3
37576	17529099	NM_001290308 // Col12a1 // collagen, type XII, alpha 1 // 9 E1|9 43.82 cM // 12816 ///	Col12a1	NM_001290308		0.0436138	4.91958	0.241787	0.120894	4.39306	0.335189	0.167595	0.0436138	1.44045	1.44045	HIGH n-6/n-3 up vs Low n-6n-3
37592	17529322	NM_001081282 // Ibtk // inhibitor of Bruton agammaglobulinemia tyrosine kinase // 9 E3.	Ibtk	NM_001081282		0.0306237	5.68913	0.122365	0.0611827	5.38338	0.17965	0.0898252	0.0306237	1.23606	1.23606	HIGH n-6/n-3 up vs Low n-6n-3
37599	17529398	NM_001198933 // Me1 // malic enzyme 1, NADP(+)-dependent, cytosolic // 9 E3.1|9 46.58 c	Me1	NM_001198933		0.0431523	8.51682	0.275478	0.137739	7.79977	0.488844	0.244422	0.0431523	1.64382	1.64382	HIGH n-6/n-3 up vs Low n-6n-3																							0	0	0
37609	17529555	XR_379689 // LOC102632389 // uncharacterized LOC102632389 // --- // 102632389 /// XR_37	LOC102632389	XR_379689		0.0292331	10.085	0.259971	0.129985	9.33002	0.461915	0.230958	0.0292331	1.68759	1.68759	HIGH n-6/n-3 up vs Low n-6n-3
37623	17529645	NR_029570 // Mir184 // microRNA 184 // 9|9 // 387179 /// ENSMUST00000083662 // Mir184 /	Mir184	NR_029570		0.0165576	2.40708	0.174583	0.0872915	2.82751	0.186375	0.0931873	0.0165576	0.7472	-1.33833	HIGH n-6/n-3 down vs Low n-6n-3
37630	17529699	NM_001033145 // 1190002N15Rik // RIKEN cDNA 1190002N15 gene // 9 E3.3|9 // 68861 /// EN	1190002N15Rik	NM_001033145		0.0130788	5.90378	0.135024	0.0675118	5.47739	0.20416	0.10208	0.0130788	1.34387	1.34387	HIGH n-6/n-3 up vs Low n-6n-3
37639	17529793	NM_007502 // Atp1b3 // ATPase, Na+/K+ transporting, beta 3 polypeptide // 9 E3.3|9 50.3	Atp1b3	NM_007502		0.0211658	8.41406	0.131293	0.0656466	8.00947	0.22578	0.11289	0.0211658	1.32371	1.32371	HIGH n-6/n-3 up vs Low n-6n-3
37683	17530291	NM_001134426 // Cdv3 // carnitine deficiency-associated gene expressed in ventricle 3 /	Cdv3	NM_001134426		0.0142775	4.83429	0.124968	0.0624842	4.55888	0.102168	0.0510841	0.0142775	1.21033	1.21033	HIGH n-6/n-3 up vs Low n-6n-3
37696	17530424	NM_029385 // Nudt16 // nudix (nucleoside diphosphate linked moiety X)-type motif 16 //	Nudt16	NM_029385		0.033706	3.4586	0.25982	0.12991	2.85156	0.358788	0.179394	0.033706	1.52313	1.52313	HIGH n-6/n-3 up vs Low n-6n-3
37742	17531168	NM_001276482 // Dag1 // dystroglycan 1 // 9 F2|9 59.08 cM // 13138 /// NM_001276486 //	Dag1	NM_001276482		0.0147369	7.78467	0.125088	0.062544	7.45969	0.145556	0.0727781	0.0147369	1.25265	1.25265	HIGH n-6/n-3 up vs Low n-6n-3
37757	17531281	NM_183250 // Tma7 // translational machinery associated 7 homolog (S. cerevisiae) // 9	Tma7	NM_183250		0.0457277	7.03986	0.272402	0.136201	6.15476	0.649667	0.324834	0.0457277	1.8469	1.8469	HIGH n-6/n-3 up vs Low n-6n-3
37806	17531900	NM_153585 // Cnot10 // CCR4-NOT transcription complex, subunit 10 // 9 F3|9 // 78893 //	Cnot10	NM_153585		0.0392313	5.35084	0.158399	0.0791993	4.96456	0.247818	0.123909	0.0392313	1.30702	1.30702	HIGH n-6/n-3 up vs Low n-6n-3
37820	17532030	NM_026442 // Cmc1 // COX assembly mitochondrial protein 1 // 9 F3|9 // 67899 /// ENSMUS	Cmc1	NM_026442		0.0357033	5.59652	0.22252	0.11126	5.27276	0.090073	0.0450365	0.0357033	1.25159	1.25159	HIGH n-6/n-3 up vs Low n-6n-3
37856	17532433	ENSMUST00000180685 // Gm26797 // predicted gene, 26797 // --- // ---	Gm26797	ENSMUST00000180685		0.0317979	3.07504	0.204271	0.102136	2.72873	0.141908	0.0709539	0.0317979	1.27131	1.27131	HIGH n-6/n-3 up vs Low n-6n-3
37950	17533134	NM_026492 // Ssxb1 // synovial sarcoma, X member B, breakpoint 1 // X A1.1|X // 67985 /	Ssxb1	NM_026492		0.0442715	2.47701	0.186831	0.0934157	2.88572	0.262536	0.131268	0.0442715	0.753294	-1.3275	HIGH n-6/n-3 down vs Low n-6n-3
37997	17533469	NM_001039941 // Cypt8 // cysteine-rich perinuclear theca 8 // --- // 664723 /// NM_0010	Cypt8	NM_001039941		0.0433875	2.69048	0.647156	0.323578	4.81486	1.53412	0.767058	0.0433875	0.229349	-4.36016	HIGH n-6/n-3 down vs Low n-6n-3
38007	17533577	NM_001167775 // Rbm10 // RNA binding motif protein 10 // X A1.3|X // 236732 /// NM_0011	Rbm10	NM_001167775		0.000339463	4.92114	0.0796029	0.0398015	4.49995	0.083759	0.0418795	0.000339463	1.33903	1.33903	HIGH n-6/n-3 up vs Low n-6n-3
38037	17533896	NM_001099347 // Gm10230 // predicted gene 10230 // X A2|X // 100042175 /// NM_001099919	Gm10230	NM_001099347		0.00653094	2.2444	0.0721208	0.0360604	2.54997	0.131451	0.0657257	0.00653094	0.80912	-1.23591	HIGH n-6/n-3 down vs Low n-6n-3
38064	17534112	NM_007451 // Slc25a5 // solute carrier family 25 (mitochondrial carrier, adenine nucleo	Slc25a5	NM_007451		0.0495845	10.0553	0.297632	0.148816	9.38837	0.45502	0.22751	0.0495845	1.58764	1.58764	HIGH n-6/n-3 up vs Low n-6n-3
38066	17534122	NM_019668 // Ube2a // ubiquitin-conjugating enzyme E2A // X A3.3|X // 22209 /// XM_0065	Ube2a	NM_019668		0.0252913	5.31445	0.274857	0.137429	4.80639	0.205719	0.10286	0.0252913	1.42214	1.42214	HIGH n-6/n-3 up vs Low n-6n-3
38098	17534335	NR_037297 // Mir3110 // microRNA 3110 // X|X 22.47 cM // 100526512 /// ENSMUST000001750	Mir3110	NR_037297		0.0379119	3.61598	0.257576	0.128788	3.25096	0.097035	0.0485175	0.0379119	1.2879	1.2879	HIGH n-6/n-3 up vs Low n-6n-3
38159	17534877	NM_027510 // 3830403N18Rik // RIKEN cDNA 3830403N18 gene // X A5|X // 70691 /// ENSMUST	3830403N18Rik	NM_027510		0.00160797	2.45775	0.156182	0.0780912	2.95552	0.0956199	0.04781	0.00160797	0.708201	-1.41203	HIGH n-6/n-3 down vs Low n-6n-3
38193	17535171	ENSMUST00000122510 // Gm24598 // predicted gene, 24598 // --- // ---	Gm24598	ENSMUST00000122510		0.0440597	5.99561	0.522174	0.261087	5.05374	0.526499	0.263249	0.0440597	1.92102	1.92102	HIGH n-6/n-3 up vs Low n-6n-3
38243	17535607	NM_001142809 // Slc6a8 // solute carrier family 6 (neurotransmitter transporter, creati	Slc6a8	NM_001142809		0.0330983	4.8641	0.416802	0.208401	4.21232	0.224183	0.112091	0.0330983	1.57111	1.57111	HIGH n-6/n-3 up vs Low n-6n-3
38244	17535627	NM_007435 // Abcd1 // ATP-binding cassette, sub-family D (ALD), member 1 // X B|X 37.39	Abcd1	NM_007435		0.0279852	5.33956	0.102941	0.0514703	5.16731	0.0607639	0.0303819	0.0279852	1.12682	1.12682	HIGH n-6/n-3 up vs Low n-6n-3
38257	17535774	NR_002899 // Snora70 // small nucleolar RNA, H/ACA box 70 // X A7.3|X // 104368 /// ENS	Snora70	NR_002899		0.0257484	6.92614	0.202343	0.101172	7.33498	0.189996	0.0949982	0.0257484	0.753228	-1.32762	HIGH n-6/n-3 down vs Low n-6n-3
38258	17535776	NM_001173547 // Taz // tafazzin // X C1-C3|X 37.95 cM // 66826 /// NM_181516 // Taz //	Taz	NM_001173547		0.0145975	5.73586	0.117885	0.0589427	5.35773	0.189056	0.0945278	0.0145975	1.29965	1.29965	HIGH n-6/n-3 up vs Low n-6n-3
38273	17535951	NM_026126 // Fundc2 // FUN14 domain containing 2 // X|X // 67391 /// ENSMUST00000033541	Fundc2	NM_026126		0.0320628	7.32375	0.231704	0.115852	6.99444	0.050032	0.025016	0.0320628	1.25641	1.25641	HIGH n-6/n-3 up vs Low n-6n-3
38274	17535957	NM_001166457 // Brcc3 // BRCA1/BRCA2-containing complex, subunit 3 // X A7.3|X // 21076	Brcc3	NM_001166457		0.00151414	5.985	0.0117006	0.00585032	5.65931	0.117843	0.0589217	0.00151414	1.25327	1.25327	HIGH n-6/n-3 up vs Low n-6n-3																							0	0	0
38403	17537112	NM_175271 // Lpar4 // lysophosphatidic acid receptor 4 // X D|X // 78134 /// ENSMUST000	Lpar4	NM_175271		0.00544726	5.6784	0.35656	0.17828	4.76516	0.24195	0.120975	0.00544726	1.88327	1.88327	HIGH n-6/n-3 up vs Low n-6n-3
38422	17537248	NM_026565 // Apool // apolipoprotein O-like // X|X E2 // 68117 /// XM_006528405 // Apoo	Apool	NM_026565		0.0232222	7.36907	0.217669	0.108834	6.95001	0.1713	0.0856498	0.0232222	1.33706	1.33706	HIGH n-6/n-3 up vs Low n-6n-3
38426	17537306	NM_001290477 // Klhl4 // kelch-like 4 // X E1|X // 237010 /// NM_001290478 // Klhl4 //	Klhl4	NM_001290477		0.04819	4.48954	0.223092	0.111546	4.01248	0.314565	0.157283	0.04819	1.3919	1.3919	HIGH n-6/n-3 up vs Low n-6n-3
38438	17537375	ENSMUST00000157914 // Gm23277 // predicted gene, 23277 // --- // ---	Gm23277	ENSMUST00000157914		0.0391608	2.12123	0.163047	0.0815235	3.02193	0.665768	0.332884	0.0391608	0.535629	-1.86696	HIGH n-6/n-3 down vs Low n-6n-3
38510	17537936	ENSMUST00000055104 // Tceal1 // transcription elongation factor A (SII)-like 1 // X F1|	Tceal1	ENSMUST00000055104		0.0117953	3.77389	0.177779	0.0888894	3.36501	0.144531	0.0722653	0.0117953	1.32766	1.32766	HIGH n-6/n-3 up vs Low n-6n-3
38536	17538206	NM_174875 // Atg4a // autophagy related 4A, cysteine peptidase // X F1|X // 666468 ///	Atg4a	NM_174875		0.0276487	6.17901	0.158893	0.0794465	5.81387	0.196348	0.0981742	0.0276487	1.28801	1.28801	HIGH n-6/n-3 up vs Low n-6n-3
38686	17539027	NM_027327 // 2210013O21Rik // RIKEN cDNA 2210013O21 gene // X F3|X // 70123 /// ENSMUST	2210013O21Rik	NM_027327		0.0419898	6.28736	0.309451	0.154725	5.80112	0.216214	0.108107	0.0419898	1.40079	1.40079	HIGH n-6/n-3 up vs Low n-6n-3
38696	17539084	ENSMUST00000104555 // n-R5s16 // nuclear encoded rRNA 5S 16 // --- // ---	n-R5s16	ENSMUST00000104555		0.0495082	7.50861	2.4042	1.2021	10.6092	0.777435	0.388717	0.0495082	0.116581	-8.57772	HIGH n-6/n-3 down vs Low n-6n-3
38748	17539682	ENSMUST00000149873 // Gm15246 // predicted gene 15246 // --- // --- /// ENSMUST00000156	Gm15246	ENSMUST00000149873		0.0460679	2.52229	0.150762	0.0753811	2.78753	0.148434	0.0742168	0.0460679	0.83206	-1.20184	HIGH n-6/n-3 down vs Low n-6n-3
38768	17539826	NR_030242 // Mir532 // microRNA 532 // X|X // 751544 /// ENSMUST00000093630 // Mir532 /	Mir532	NR_030242		0.00650743	2.06424	0.142628	0.0713141	2.37294	0.0506377	0.0253188	0.00650743	0.807369	-1.23859	HIGH n-6/n-3 down vs Low n-6n-3
38775	17539879	ENSMUST00000033486 // Plp2 // proteolipid protein 2 // X A2-A3.1|X 3.45 cM // 18824 ///	Plp2	ENSMUST00000033486		0.0371225	4.58353	0.267815	0.133908	4.07299	0.273385	0.136692	0.0371225	1.42459	1.42459	HIGH n-6/n-3 up vs Low n-6n-3
38803	17540178	NM_025975 // Dynlt3 // dynein light chain Tctex-type 3 // X A1.1|X // 67117 /// ENSMUST	Dynlt3	NM_025975		0.0390144	6.6199	0.147656	0.073828	6.24023	0.247998	0.123999	0.0390144	1.30104	1.30104	HIGH n-6/n-3 up vs Low n-6n-3
38841	17540535	NM_007922 // Elk1 // ELK1, member of ETS oncogene family // X A1-A3|X 16.45 cM // 13712	Elk1	NM_007922		0.0144403	3.96719	0.093781	0.0468905	3.65789	0.155716	0.0778582	0.0144403	1.23911	1.23911	HIGH n-6/n-3 up vs Low n-6n-3
38854	17540653	NM_001040669 // Gm5169 // predicted gene 5169 // X A2|X // 382277 /// NM_001099347 // G	Gm5169	NM_001040669		9.62959e-05	2.3659	0.058502	0.029251	2.69482	0.0418845	0.0209423	9.62959e-05	0.796127	-1.25608	HIGH n-6/n-3 down vs Low n-6n-3
38891	17540977	NM_029891 // Nkrf // NF-kappaB repressing factor // X A3.3|X // 77286 /// ENSMUST000000	Nkrf	NM_029891		0.0290053	3.14988	0.0486793	0.0243396	3.49148	0.234331	0.117166	0.0290053	0.789163	-1.26716	HIGH n-6/n-3 down vs Low n-6n-3
38907	17541089	ENSMUST00000082763 // Gm24147 // predicted gene, 24147 // --- // ---	Gm24147	ENSMUST00000082763		0.0142761	1.9539	0.198274	0.0991369	2.34173	0.111147	0.0555734	0.0142761	0.764281	-1.30842	HIGH n-6/n-3 down vs Low n-6n-3
38953	17541612	NM_172413 // Rap2c // RAP2C, member of RAS oncogene family // X A5|X // 72065 /// ENSMU	Rap2c	NM_172413		0.033538	5.98376	0.162214	0.0811068	5.64656	0.184592	0.0922961	0.033538	1.26331	1.26331	HIGH n-6/n-3 up vs Low n-6n-3
38976	17541745	NM_001166365 // Fam122b // family with sequence similarity 122, member B // X A5|X // 7	Fam122b	NM_001166365		0.00517052	4.0956	0.112356	0.0561782	3.79074	0.0872531	0.0436265	0.00517052	1.23531	1.23531	HIGH n-6/n-3 up vs Low n-6n-3
39046	17542209	NR_029808 // Mir224 // microRNA 224 // X|X // 723894 /// ENSMUST00000083608 // Mir224 /	Mir224	NR_029808		0.0169322	2.94864	0.121987	0.0609937	2.66558	0.122486	0.0612429	0.0169322	1.21677	1.21677	HIGH n-6/n-3 up vs Low n-6n-3
39067	17542392	NM_008323 // Idh3g // isocitrate dehydrogenase 3 (NAD+), gamma // X A7.3-B|X 37.41 cM /	Idh3g	NM_008323		0.0420227	10.3195	0.314212	0.157106	9.64925	0.414982	0.207491	0.0420227	1.5914	1.5914	HIGH n-6/n-3 up vs Low n-6n-3
39081	17542670	NM_001256104 // Slc10a3 // solute carrier family 10 (sodium/bile acid cotransporter fam	Slc10a3	NM_001256104		0.0361139	3.51904	0.0982114	0.0491057	3.2704	0.156721	0.0783605	0.0361139	1.18809	1.18809	HIGH n-6/n-3 up vs Low n-6n-3
39133	17543104	NR_027651 // Meg3 // maternally expressed 3 // 12 F1|12 60.25 cM // 17263 /// NR_027652	Meg3	NR_027651		0.0113848	5.93083	0.489816	0.244908	4.79465	0.398502	0.199251	0.0113848	2.19798	2.19798	HIGH n-6/n-3 up vs Low n-6n-3																							0	0	0
39223	17544061	NM_001281859 // Cysltr1 // cysteinyl leukotriene receptor 1 // X|X D // 58861 /// NM_02	Cysltr1	NM_001281859		0.00188648	3.41642	0.0714002	0.0357001	3.00988	0.136828	0.068414	0.00188648	1.3255	1.3255	HIGH n-6/n-3 up vs Low n-6n-3
39231	17544149	NM_016710 // Hmgn5 // high-mobility group nucleosome binding domain 5 // X D|X // 50887	Hmgn5	NM_016710		0.000522921	3.3598	0.0491215	0.0245608	3.68188	0.0821157	0.0410578	0.000522921	0.799912	-1.25014	HIGH n-6/n-3 down vs Low n-6n-3
39247	17544273	NM_153109 // Tgif2lx1 // TGFB-induced factor homeobox 2-like, X-linked 1 // X E1|X // 2	Tgif2lx1	NM_153109		0.0270506	2.54742	0.135479	0.0677395	2.74793	0.0257485	0.0128743	0.0270506	0.870241	-1.14911	HIGH n-6/n-3 down vs Low n-6n-3
39284	17544453	NM_001167994 // Trmt2b // TRM2 tRNA methyltransferase 2B // X E3|X // 215201 /// NM_172	Trmt2b	NM_001167994		0.0042032	4.92837	0.156073	0.0780363	4.49069	0.117734	0.0588669	0.0042032	1.35443	1.35443	HIGH n-6/n-3 up vs Low n-6n-3
39346	17545078	NM_019496 // Ammecr1 // Alport syndrome, mental retardation, midface hypoplasia and ell	Ammecr1	NM_019496		0.0404729	5.66684	0.113957	0.0569787	5.27734	0.276663	0.138332	0.0404729	1.30994	1.30994	HIGH n-6/n-3 up vs Low n-6n-3
39465	17545977	ENSMUST00000158846 // Gm25367 // predicted gene, 25367 // --- // ---	Gm25367	ENSMUST00000158846		0.0427784	2.71885	0.127041	0.0635203	3.23914	0.385743	0.192872	0.0427784	0.697228	-1.43425	HIGH n-6/n-3 down vs Low n-6n-3
39489	17546203	ENSMUST00000083782 // Gm25651 // predicted gene, 25651 // --- // ---	Gm25651	ENSMUST00000083782		0.0117545	3.98496	0.182577	0.0912884	4.42178	0.162729	0.0813646	0.0117545	0.738764	-1.35361	HIGH n-6/n-3 down vs Low n-6n-3
39809	17547559	XR_393188 // LOC102638331 // uncharacterized LOC102638331 // --- // 102638331	LOC102638331	XR_393188		0.00649516	2.76932	0.134279	0.0671397	3.12228	0.109043	0.0545215	0.00649516	0.782978	-1.27718	HIGH n-6/n-3 down vs Low n-6n-3
39876	17547698	NM_053071 // Cox6c // cytochrome c oxidase subunit VIc // 15|15 B3.3 // 12864 /// XM_00	Cox6c	NM_053071		0.0483678	9.95982	0.468378	0.234189	9.14988	0.458521	0.22926	0.0483678	1.75313	1.75313	HIGH n-6/n-3 up vs Low n-6n-3
39884	17547715	XM_006543006 // LOC102642766 // 60S ribosomal protein L29-like // --- // 102642766 ///	LOC102642766	XM_006543006		0.0278319	2.95356	0.0533579	0.0266789	2.67868	0.182858	0.0914292	0.0278319	1.2099	1.2099	HIGH n-6/n-3 up vs Low n-6n-3
39896	17547744	NM_025415 // Cks2 // CDC28 protein kinase regulatory subunit 2 // 13 A5|13 // 66197 ///	Cks2	NM_025415		0.0276258	6.17492	0.497818	0.248909	5.09762	0.55433	0.277165	0.0276258	2.11008	2.11008	HIGH n-6/n-3 up vs Low n-6n-3
39920	17547795	NM_001198998 // Vdac3 // voltage-dependent anion channel 3 // 8 A2|8 11.42 cM // 22335	Vdac3	NM_001198998		0.0290943	10.3289	0.355907	0.177953	9.49908	0.460312	0.230156	0.0290943	1.77745	1.77745	HIGH n-6/n-3 up vs Low n-6n-3
39985	17547933	NM_001024919 // Bod1 // biorientation of chromosomes in cell division 1 // 11 A4|11 18.	Bod1	NM_001024919		0.00120798	6.7573	0.224524	0.112262	5.89729	0.197917	0.0989585	0.00120798	1.81505	1.81505	HIGH n-6/n-3 up vs Low n-6n-3
39992	17547947	XM_003085105 // Gm20056 // predicted gene, 20056 // 16|16 22.67 cM // 100504089 /// NM_	Gm20056	XM_003085105		0.0472807	7.93153	0.0941313	0.0470656	7.52172	0.315674	0.157837	0.0472807	1.32851	1.32851	HIGH n-6/n-3 up vs Low n-6n-3
40022	17548012	ENSMUST00000097278 // Gm6594 // predicted pseudogene 6594 // --- // ---	Gm6594	ENSMUST00000097278		0.0145088	6.17652	0.260945	0.130472	5.45815	0.332496	0.166248	0.0145088	1.64533	1.64533	HIGH n-6/n-3 up vs Low n-6n-3
40140	17548262	XM_006543731 // Gm15466 // predicted gene 15466 // 3|3 2.21 cM // 100504173 /// ENSMUST	Gm15466	XM_006543731		0.0380275	6.88601	0.169953	0.0849767	6.51537	0.22217	0.111085	0.0380275	1.29292	1.29292	HIGH n-6/n-3 up vs Low n-6n-3
40150	17548283	NM_008211 // H3f3b // H3 histone, family 3B // 11 E2|11 // 15081 /// XM_006532248 // H3	H3f3b	NM_008211		0.0197948	9.97841	0.102759	0.0513793	9.39637	0.354877	0.177439	0.0197948	1.49696	1.49696	HIGH n-6/n-3 up vs Low n-6n-3
40158	17548303	NM_025415 // Cks2 // CDC28 protein kinase regulatory subunit 2 // 13 A5|13 // 66197 ///	Cks2	NM_025415		0.0276258	6.17492	0.497818	0.248909	5.09762	0.55433	0.277165	0.0276258	2.11008	2.11008	HIGH n-6/n-3 up vs Low n-6n-3
40173	17548334	NM_019766 // Ptges3 // prostaglandin E synthase 3 (cytosolic) // 10 D3|10 // 56351 ///	Ptges3	NM_019766		0.0199549	8.58443	0.187188	0.093594	8.21475	0.142296	0.0711478	0.0199549	1.29207	1.29207	HIGH n-6/n-3 up vs Low n-6n-3
40217	17548428	NM_026219 // Uqcrb // ubiquinol-cytochrome c reductase binding protein // 13 B3|13 // 6	Uqcrb	NM_026219		0.0374434	10.975	0.233537	0.116768	10.1066	0.609316	0.304658	0.0374434	1.82564	1.82564	HIGH n-6/n-3 up vs Low n-6n-3
40226	17548446	NM_024180 // Ormdl2 // ORM1-like 2 (S. cerevisiae) // 10 D3|10 // 66844 /// XM_00654393	Ormdl2	NM_024180		0.0335354	6.43523	0.233204	0.116602	5.93144	0.283547	0.141774	0.0335354	1.41793	1.41793	HIGH n-6/n-3 up vs Low n-6n-3
40258	17548520	NM_001142734 // Gm8994 // predicted gene 8994 // 6 G1|6 // 668137 /// NM_138669 // Eif4	Gm8994	NM_001142734		0.0426852	7.05006	0.118236	0.0591182	6.73907	0.211832	0.105916	0.0426852	1.24056	1.24056	HIGH n-6/n-3 up vs Low n-6n-3
40287	17548585	NM_008971 // Twf1 // twinfilin, actin-binding protein, homolog 1 (Drosophila) // 15|15	Twf1	NM_008971		0.0443574	7.45727	0.199276	0.0996382	7.07122	0.230284	0.115142	0.0443574	1.30681	1.30681	HIGH n-6/n-3 up vs Low n-6n-3
40440	17548912	NM_007624 // Cbx3 // chromobox 3 // 6 B-C|6 24.89 cM // 12417 /// XM_006544713 // LOC10	Cbx3	NM_007624		0.0381086	8.96625	0.235227	0.117614	8.53947	0.220312	0.110156	0.0381086	1.34423	1.34423	HIGH n-6/n-3 up vs Low n-6n-3
40457	17548946	NM_008211 // H3f3b // H3 histone, family 3B // 11 E2|11 // 15081 /// XM_006532248 // H3	H3f3b	NM_008211		0.0267126	9.73161	0.0525379	0.0262689	9.21672	0.349018	0.174509	0.0267126	1.42889	1.42889	HIGH n-6/n-3 up vs Low n-6n-3
40461	17548955	NM_025415 // Cks2 // CDC28 protein kinase regulatory subunit 2 // 13 A5|13 // 66197 ///	Cks2	NM_025415		0.0276258	6.17492	0.497818	0.248909	5.09762	0.55433	0.277165	0.0276258	2.11008	2.11008	HIGH n-6/n-3 up vs Low n-6n-3
40916	17549890	NM_007846 // Defa-rs12 // defensin, alpha, related sequence 12 // 8 A2|8 // 13221	Defa-rs12	NM_007846		0.0290036	3.17131	0.286274	0.143137	2.70778	0.153343	0.0766714	0.0290036	1.37892	1.37892	HIGH n-6/n-3 up vs Low n-6n-3
40919	17549896	XM_006536724 // H2-T18 // histocompatibility 2, T region locus 18 // --- // 15033 /// X	H2-T18	XM_006536724		0.0195027	2.80961	0.199033	0.0995165	3.18071	0.124361	0.0621805	0.0195027	0.773189	-1.29334	HIGH n-6/n-3 down vs Low n-6n-3
40997	17550158	ENSMUST00000104639 // Gm23237 // predicted gene, 23237 // --- // ---	Gm23237	ENSMUST00000104639		0.0128816	2.2738	0.055013	0.0275065	2.6383	0.20111	0.100555	0.0128816	0.776736	-1.28744	HIGH n-6/n-3 down vs Low n-6n-3
41010	17550210	ENSMUST00000158758 // Gm24676 // predicted gene, 24676 // --- // ---	Gm24676	ENSMUST00000158758		0.0179159	3.09682	0.198351	0.0991753	2.70422	0.140571	0.0702853	0.0179159	1.31275	1.31275	HIGH n-6/n-3 up vs Low n-6n-3																							0	0	0
41032	17550334	NM_001037748 // Gm20736 // predicted gene, 20736 // Y A1|Y // 380994 /// NM_201530 // S	Gm20736	NM_001037748		0.0429038	2.433	0.138756	0.0693781	2.98967	0.41215	0.206075	0.0429038	0.679872	-1.47086	HIGH n-6/n-3 down vs Low n-6n-3
41033	17550336	NM_001037748 // Gm20736 // predicted gene, 20736 // Y A1|Y // 380994 /// NM_201530 // S	Gm20736	NM_001037748		0.0429038	2.433	0.138756	0.0693781	2.98967	0.41215	0.206075	0.0429038	0.679872	-1.47086	HIGH n-6/n-3 down vs Low n-6n-3																							0	0	0
41034	17550338	NM_001037748 // Gm20736 // predicted gene, 20736 // Y A1|Y // 380994 /// NM_201530 // S	Gm20736	NM_001037748		0.0429038	2.433	0.138756	0.0693781	2.98967	0.41215	0.206075	0.0429038	0.679872	-1.47086	HIGH n-6/n-3 down vs Low n-6n-3
41035	17550340	NM_001037748 // Gm20736 // predicted gene, 20736 // Y A1|Y // 380994 /// NM_201530 // S	Gm20736	NM_001037748		0.0429038	2.433	0.138756	0.0693781	2.98967	0.41215	0.206075	0.0429038	0.679872	-1.47086	HIGH n-6/n-3 down vs Low n-6n-3
41036	17550342	NM_001037748 // Gm20736 // predicted gene, 20736 // Y A1|Y // 380994 /// NM_201530 // S	Gm20736	NM_001037748		0.0126081	2.71708	0.102437	0.0512185	3.40927	0.380399	0.1902	0.0126081	0.618911	-1.61574	HIGH n-6/n-3 down vs Low n-6n-3
41037	17550344	NM_001037748 // Gm20736 // predicted gene, 20736 // Y A1|Y // 380994 /// NM_201530 // S	Gm20736	NM_001037748		0.0429038	2.433	0.138756	0.0693781	2.98967	0.41215	0.206075	0.0429038	0.679872	-1.47086	HIGH n-6/n-3 down vs Low n-6n-3
41039	17550352	NM_001037748 // Gm20736 // predicted gene, 20736 // Y A1|Y // 380994 /// NM_201530 // S	Gm20736	NM_001037748		0.0429038	2.433	0.138756	0.0693781	2.98967	0.41215	0.206075	0.0429038	0.679872	-1.47086	HIGH n-6/n-3 down vs Low n-6n-3
41040	17550354	NM_001037748 // Gm20736 // predicted gene, 20736 // Y A1|Y // 380994 /// NM_201530 // S	Gm20736	NM_001037748		0.0429038	2.433	0.138756	0.0693781	2.98967	0.41215	0.206075	0.0429038	0.679872	-1.47086	HIGH n-6/n-3 down vs Low n-6n-3
41041	17550356	NM_001037748 // Gm20736 // predicted gene, 20736 // Y A1|Y // 380994 /// NM_201530 // S	Gm20736	NM_001037748		0.0429038	2.433	0.138756	0.0693781	2.98967	0.41215	0.206075	0.0429038	0.679872	-1.47086	HIGH n-6/n-3 down vs Low n-6n-3
41042	17550358	NM_001037748 // Gm20736 // predicted gene, 20736 // Y A1|Y // 380994 /// NM_201530 // S	Gm20736	NM_001037748		0.0429038	2.433	0.138756	0.0693781	2.98967	0.41215	0.206075	0.0429038	0.679872	-1.47086	HIGH n-6/n-3 down vs Low n-6n-3																							0	0	0
41048	17550370	ENSMUST00000162209 // Gm16536 // predicted gene 16536 // --- // ---	Gm16536	ENSMUST00000162209		0.0425017	5.41313	0.186702	0.093351	5.04543	0.217275	0.108637	0.0425017	1.29029	1.29029	HIGH n-6/n-3 up vs Low n-6n-3
41072	17550418	ENSMUST00000182185 // Mirg // miRNA containing gene // 12 F1|12 // 100040724 /// ENSMUS	Mirg	ENSMUST00000182185		0.0448115	3.15953	0.267472	0.133736	2.80125	0.0938686	0.0469343	0.0448115	1.28189	1.28189	HIGH n-6/n-3 up vs Low n-6n-3
